# Supplementary material
Source: publisher site journal article supplement (http://www.dovepress.com/get_supplementary_file.php?f=269726.xlsx)
Supplement: Supplementary file 1 [file get_supplementary_file.php]

## Sheet: Table S1
Table S1 The information of compositive ingredients and the corresponding putative targets of YZQX.
Drug	Mol ID	MolName	Symbol
Chuanxiong	MOL001494	Mandenol	PTGS1
Chuanxiong	MOL001494	Mandenol	PTGS2
Chuanxiong	MOL001494	Mandenol	NCOA2
Chuanxiong	MOL002135	Myricanone	NOS2
Chuanxiong	MOL002135	Myricanone	PTGS1
Chuanxiong	MOL002135	Myricanone	HTR
Chuanxiong	MOL002135	Myricanone	KCNH2
Chuanxiong	MOL002135	Myricanone	ESR1
Chuanxiong	MOL002135	Myricanone	AR
Chuanxiong	MOL002135	Myricanone	SCN5A
Chuanxiong	MOL002135	Myricanone	PPARG
Chuanxiong	MOL002135	Myricanone	PTGS2
Chuanxiong	MOL002135	Myricanone	F7
Chuanxiong	MOL002135	Myricanone	KDR
Chuanxiong	MOL002135	Myricanone	RXRA
Chuanxiong	MOL002135	Myricanone	ADRB2
Chuanxiong	MOL002135	Myricanone	ESR2
Chuanxiong	MOL002135	Myricanone	DPP4
Chuanxiong	MOL002135	Myricanone	MAPK14
Chuanxiong	MOL002135	Myricanone	GSK3B
Chuanxiong	MOL002135	Myricanone	HSP90AA1
Chuanxiong	MOL002135	Myricanone	CDK2
Chuanxiong	MOL002135	Myricanone	CHEK1
Chuanxiong	MOL002135	Myricanone	IGHG1
Chuanxiong	MOL002135	Myricanone	CCNA2
Chuanxiong	MOL002135	Myricanone	NCOA1
Chuanxiong	MOL002140	Perlolyrine	HTR
Chuanxiong	MOL002140	Perlolyrine	PTGS2
Chuanxiong	MOL002140	Perlolyrine	RXRA
Chuanxiong	MOL002157	wallichilide	PTGS2
Chuanxiong	MOL002157	wallichilide	NR3C2
Chuanxiong	MOL002157	wallichilide	NR3C1
Chuanxiong	MOL002157	wallichilide	NCOA2
Chuanxiong	MOL000359	sitosterol	PGR
Chuanxiong	MOL000359	sitosterol	NCOA2
Chuanxiong	MOL000359	sitosterol	NR3C2
Chuanxiong	MOL000433	FA	CDK2
Chuanxiong	MOL000433	FA	HTR
Chuanxiong	MOL000433	FA	GSK3B
Huanglian	MOL001454	berberine	NOS2
Huanglian	MOL001454	berberine	PTGS1
Huanglian	MOL001454	berberine	KCNH2
Huanglian	MOL001454	berberine	ESR1
Huanglian	MOL001454	berberine	AR
Huanglian	MOL001454	berberine	SCN5A
Huanglian	MOL001454	berberine	PTGS2
Huanglian	MOL001454	berberine	RXRA
Huanglian	MOL001454	berberine	ADRB2
Huanglian	MOL001454	berberine	HSP90AA1
Huanglian	MOL001454	berberine	PRSS1
Huanglian	MOL001454	berberine	NCOA2
Huanglian	MOL001454	berberine	PDE10A
Huanglian	MOL001454	berberine	CALM1
Huanglian	MOL002894	berberrubine	NOS2
Huanglian	MOL002894	berberrubine	PTGS1
Huanglian	MOL002894	berberrubine	KCNH2
Huanglian	MOL002894	berberrubine	ESR1
Huanglian	MOL002894	berberrubine	AR
Huanglian	MOL002894	berberrubine	SCN5A
Huanglian	MOL002894	berberrubine	PTGS2
Huanglian	MOL002894	berberrubine	RXRA
Huanglian	MOL002894	berberrubine	PRSS1
Huanglian	MOL002894	berberrubine	NCOA2
Huanglian	MOL002894	berberrubine	CALM1
Huanglian	MOL002897	epiberberine	NOS2
Huanglian	MOL002897	epiberberine	KCNH2
Huanglian	MOL002897	epiberberine	ESR1
Huanglian	MOL002897	epiberberine	AR
Huanglian	MOL002897	epiberberine	PTGS2
Huanglian	MOL002897	epiberberine	RXRA
Huanglian	MOL002897	epiberberine	PRSS1
Huanglian	MOL002897	epiberberine	NCOA2
Huanglian	MOL002897	epiberberine	PDE10A
Huanglian	MOL002903	(R)-Canadine	PTGS1
Huanglian	MOL002903	(R)-Canadine	CHRM3
Huanglian	MOL002903	(R)-Canadine	KCNH2
Huanglian	MOL002903	(R)-Canadine	CHRM1
Huanglian	MOL002903	(R)-Canadine	SCN5A
Huanglian	MOL002903	(R)-Canadine	CHRM5
Huanglian	MOL002903	(R)-Canadine	PTGS2
Huanglian	MOL002903	(R)-Canadine	HTR3A
Huanglian	MOL002903	(R)-Canadine	ADRA2C
Huanglian	MOL002903	(R)-Canadine	CHRM4
Huanglian	MOL002903	(R)-Canadine	OPRD1
Huanglian	MOL002903	(R)-Canadine	ADRA1B
Huanglian	MOL002903	(R)-Canadine	SLC6A3
Huanglian	MOL002903	(R)-Canadine	ADRB2
Huanglian	MOL002903	(R)-Canadine	ADRA1D
Huanglian	MOL002903	(R)-Canadine	SLC6A4
Huanglian	MOL002903	(R)-Canadine	OPRM1
Huanglian	MOL002903	(R)-Canadine	HSP90AA1
Huanglian	MOL002903	(R)-Canadine	PDE10A
Huanglian	MOL002903	(R)-Canadine	CALM1
Huanglian	MOL002903	(R)-Canadine	DRD1
Huanglian	MOL002903	(R)-Canadine	DRD5
Huanglian	MOL002903	(R)-Canadine	RXRA
Huanglian	MOL002903	(R)-Canadine	SLC6A2
Huanglian	MOL002903	(R)-Canadine	ADRA1A
Huanglian	MOL002903	(R)-Canadine	CHRM2
Huanglian	MOL002904	Berlambine	NOS2
Huanglian	MOL002904	Berlambine	PTGS1
Huanglian	MOL002904	Berlambine	CHRM3
Huanglian	MOL002904	Berlambine	KCNH2
Huanglian	MOL002904	Berlambine	AR
Huanglian	MOL002904	Berlambine	SCN5A
Huanglian	MOL002904	Berlambine	PTGS2
Huanglian	MOL002904	Berlambine	F7
Huanglian	MOL002904	Berlambine	RXRA
Huanglian	MOL002904	Berlambine	ADRA1B
Huanglian	MOL002904	Berlambine	ADRB2
Huanglian	MOL002904	Berlambine	ADRA1D
Huanglian	MOL002904	Berlambine	HSP90AA1
Huanglian	MOL002904	Berlambine	PRSS1
Huanglian	MOL002904	Berlambine	NCOA2
Huanglian	MOL002904	Berlambine	CALM1
Huanglian	MOL002907	Corchoroside A_qt	NR3C2
Huanglian	MOL002907	Corchoroside A_qt	NCOA2
Huanglian	MOL000622	Magnograndiolide	GABRA1
Huanglian	MOL000622	Magnograndiolide	GRIA2
Huanglian	MOL000785	palmatine	NOS2
Huanglian	MOL000785	palmatine	PTGS1
Huanglian	MOL000785	palmatine	KCNH2
Huanglian	MOL000785	palmatine	ESR1
Huanglian	MOL000785	palmatine	AR
Huanglian	MOL000785	palmatine	SCN5A
Huanglian	MOL000785	palmatine	PTGS2
Huanglian	MOL000785	palmatine	RXRA
Huanglian	MOL000785	palmatine	ADRB2
Huanglian	MOL000785	palmatine	ESR2
Huanglian	MOL000785	palmatine	HSP90AA1
Huanglian	MOL000785	palmatine	PRSS1
Huanglian	MOL000785	palmatine	NCOA2
Huanglian	MOL000785	palmatine	CALM1
Huanglian	MOL000785	palmatine	CDK2
Huanglian	MOL000785	palmatine	F7
Huanglian	MOL000098	quercetin	PTGS1
Huanglian	MOL000098	quercetin	AR
Huanglian	MOL000098	quercetin	PPARG
Huanglian	MOL000098	quercetin	PTGS2
Huanglian	MOL000098	quercetin	HSP90AA1
Huanglian	MOL000098	quercetin	NCOA2
Huanglian	MOL000098	quercetin	DPP4
Huanglian	MOL000098	quercetin	AKR1B1
Huanglian	MOL000098	quercetin	PRSS1
Huanglian	MOL000098	quercetin	HTR
Huanglian	MOL000098	quercetin	KCNH2
Huanglian	MOL000098	quercetin	SCN5A
Huanglian	MOL000098	quercetin	ADRB2
Huanglian	MOL000098	quercetin	MMP3
Huanglian	MOL000098	quercetin	F7
Huanglian	MOL000098	quercetin	RXRA
Huanglian	MOL000098	quercetin	ACHE
Huanglian	MOL000098	quercetin	GABRA1
Huanglian	MOL000098	quercetin	MAOB
Huanglian	MOL000098	quercetin	RELA
Huanglian	MOL000098	quercetin	EGFR
Huanglian	MOL000098	quercetin	AKT1
Huanglian	MOL000098	quercetin	VEGFA
Huanglian	MOL000098	quercetin	CCND1
Huanglian	MOL000098	quercetin	BCL2
Huanglian	MOL000098	quercetin	BCL2L1
Huanglian	MOL000098	quercetin	FOS
Huanglian	MOL000098	quercetin	CDKN1A
Huanglian	MOL000098	quercetin	EIF6
Huanglian	MOL000098	quercetin	BAX
Huanglian	MOL000098	quercetin	CASP9
Huanglian	MOL000098	quercetin	PLAU
Huanglian	MOL000098	quercetin	MMP2
Huanglian	MOL000098	quercetin	MMP9
Huanglian	MOL000098	quercetin	MAPK1
Huanglian	MOL000098	quercetin	IL10RB
Huanglian	MOL000098	quercetin	EGF
Huanglian	MOL000098	quercetin	RB1
Huanglian	MOL000098	quercetin	TNFSF15
Huanglian	MOL000098	quercetin	JUN
Huanglian	MOL000098	quercetin	IL6
Huanglian	MOL000098	quercetin	AHSA1
Huanglian	MOL000098	quercetin	CASP3
Huanglian	MOL000098	quercetin	TP63
Huanglian	MOL000098	quercetin	ELK1
Huanglian	MOL000098	quercetin	NFKBIA
Huanglian	MOL000098	quercetin	POR
Huanglian	MOL000098	quercetin	ODC1
Huanglian	MOL000098	quercetin	CASP8
Huanglian	MOL000098	quercetin	TOP1
Huanglian	MOL000098	quercetin	RAF1
Huanglian	MOL000098	quercetin	SOD1
Huanglian	MOL000098	quercetin	PRKCA
Huanglian	MOL000098	quercetin	MMP1
Huanglian	MOL000098	quercetin	HIF1A
Huanglian	MOL000098	quercetin	STAT1
Huanglian	MOL000098	quercetin	RUNX1T1
Huanglian	MOL000098	quercetin	CDK1
Huanglian	MOL000098	quercetin	HSPA5
Huanglian	MOL000098	quercetin	ERBB2
Huanglian	MOL000098	quercetin	PPARG
Huanglian	MOL000098	quercetin	ACACA
Huanglian	MOL000098	quercetin	HMOX1
Huanglian	MOL000098	quercetin	CYP3A4
Huanglian	MOL000098	quercetin	CYP1A2
Huanglian	MOL000098	quercetin	CAV1
Huanglian	MOL000098	quercetin	MYC
Huanglian	MOL000098	quercetin	F3
Huanglian	MOL000098	quercetin	GJA1
Huanglian	MOL000098	quercetin	CYP1A1
Huanglian	MOL000098	quercetin	ICAM1
Huanglian	MOL000098	quercetin	IL1B
Huanglian	MOL000098	quercetin	CCL2
Huanglian	MOL000098	quercetin	SELE
Huanglian	MOL000098	quercetin	VCAM1
Huanglian	MOL000098	quercetin	PTGER3
Huanglian	MOL000098	quercetin	IL8RA
Huanglian	MOL000098	quercetin	PRKCB
Huanglian	MOL000098	quercetin	BIRC5
Huanglian	MOL000098	quercetin	DUOX2
Huanglian	MOL000098	quercetin	NOS3
Huanglian	MOL000098	quercetin	HSPB1
Huanglian	MOL000098	quercetin	SULT1E1
Huanglian	MOL000098	quercetin	MGAM
Huanglian	MOL000098	quercetin	IL2
Huanglian	MOL000098	quercetin	NR1I2
Huanglian	MOL000098	quercetin	CYP1B1
Huanglian	MOL000098	quercetin	CCNB1
Huanglian	MOL000098	quercetin	PLAT
Huanglian	MOL000098	quercetin	THBD
Huanglian	MOL000098	quercetin	SERPINE1
Huanglian	MOL000098	quercetin	COL1A1
Huanglian	MOL000098	quercetin	IFNGR1
Huanglian	MOL000098	quercetin	ALOX5
Huanglian	MOL000098	quercetin	IL1A
Huanglian	MOL000098	quercetin	MPO
Huanglian	MOL000098	quercetin	TOP2A
Huanglian	MOL000098	quercetin	NCF1
Huanglian	MOL000098	quercetin	ABCG2
Huanglian	MOL000098	quercetin	HAS2
Huanglian	MOL000098	quercetin	GSTP1
Huanglian	MOL000098	quercetin	NFE2L2
Huanglian	MOL000098	quercetin	NQO1
Huanglian	MOL000098	quercetin	PARP1
Huanglian	MOL000098	quercetin	AHR
Huanglian	MOL000098	quercetin	PSMD3
Huanglian	MOL000098	quercetin	SLC2A4
Huanglian	MOL000098	quercetin	COL3A1
Huanglian	MOL000098	quercetin	CXCL11
Huanglian	MOL000098	quercetin	CXCL2
Huanglian	MOL000098	quercetin	DCAF5
Huanglian	MOL000098	quercetin	NR1I3
Huanglian	MOL000098	quercetin	CHEK2
Huanglian	MOL000098	quercetin	INSRR
Huanglian	MOL000098	quercetin	CLDN4
Huanglian	MOL000098	quercetin	PPARA
Huanglian	MOL000098	quercetin	PPARD
Huanglian	MOL000098	quercetin	HSF1
Huanglian	MOL000098	quercetin	CRP
Huanglian	MOL000098	quercetin	CXCL10
Huanglian	MOL000098	quercetin	CHUK
Huanglian	MOL000098	quercetin	SPP1
Huanglian	MOL000098	quercetin	RUNX2
Huanglian	MOL000098	quercetin	RASSF1
Huanglian	MOL000098	quercetin	E2F1
Huanglian	MOL000098	quercetin	E2F2
Huanglian	MOL000098	quercetin	ACPP
Huanglian	MOL000098	quercetin	CTSD
Huanglian	MOL000098	quercetin	IGFBP3
Huanglian	MOL000098	quercetin	IGF2
Huanglian	MOL000098	quercetin	CD40LG
Huanglian	MOL000098	quercetin	IRF1
Huanglian	MOL000098	quercetin	ERBB3
Huanglian	MOL000098	quercetin	PON1
Huanglian	MOL000098	quercetin	DIO1
Huanglian	MOL000098	quercetin	PCOLCE
Huanglian	MOL000098	quercetin	NPEPPS
Huanglian	MOL000098	quercetin	HK2
Huanglian	MOL000098	quercetin	RASA1
Huanglian	MOL000098	quercetin	GSTM1
Huanglian	MOL000098	quercetin	GSTM2
Huanglian	MOL001458	coptisine	NOS2
Huanglian	MOL001458	coptisine	PTGS1
Huanglian	MOL001458	coptisine	KCNH2
Huanglian	MOL001458	coptisine	ESR1
Huanglian	MOL001458	coptisine	AR
Huanglian	MOL001458	coptisine	SCN5A
Huanglian	MOL001458	coptisine	PTGS2
Huanglian	MOL001458	coptisine	PRSS1
Huanglian	MOL002668	Worenine	NOS2
Huanglian	MOL002668	Worenine	PTGS1
Huanglian	MOL002668	Worenine	ESR1
Huanglian	MOL002668	Worenine	AR
Huanglian	MOL002668	Worenine	PTGS2
Huanglian	MOL002668	Worenine	CHEK1
Renshen	MOL002879	Diop	SCN5A
Renshen	MOL002879	Diop	ADRB2
Renshen	MOL002879	Diop	CHRM3
Renshen	MOL000449	Stigmasterol	PGR
Renshen	MOL000449	Stigmasterol	NR3C2
Renshen	MOL000449	Stigmasterol	NCOA2
Renshen	MOL000449	Stigmasterol	ADH1C
Renshen	MOL000449	Stigmasterol	IGHG1
Renshen	MOL000449	Stigmasterol	RXRA
Renshen	MOL000449	Stigmasterol	NCOA1
Renshen	MOL000449	Stigmasterol	PTGS1
Renshen	MOL000449	Stigmasterol	PTGS2
Renshen	MOL000449	Stigmasterol	ADRA2A
Renshen	MOL000449	Stigmasterol	SLC6A2
Renshen	MOL000449	Stigmasterol	SLC6A3
Renshen	MOL000449	Stigmasterol	ADRB2
Renshen	MOL000449	Stigmasterol	AKR1B1
Renshen	MOL000449	Stigmasterol	PLAU
Renshen	MOL000449	Stigmasterol	LTA4H
Renshen	MOL000449	Stigmasterol	MAOB
Renshen	MOL000449	Stigmasterol	MAOA
Renshen	MOL000449	Stigmasterol	CTRB1
Renshen	MOL000449	Stigmasterol	CHRM3
Renshen	MOL000449	Stigmasterol	CHRM1
Renshen	MOL000449	Stigmasterol	ADRB1
Renshen	MOL000449	Stigmasterol	SCN5A
Renshen	MOL000449	Stigmasterol	ADRA1A
Renshen	MOL000449	Stigmasterol	CHRM2
Renshen	MOL000449	Stigmasterol	ADRA1B
Renshen	MOL000449	Stigmasterol	GABRA1
Renshen	MOL000358	beta-sitosterol	PGR
Renshen	MOL000358	beta-sitosterol	NCOA2
Renshen	MOL000358	beta-sitosterol	PTGS1
Renshen	MOL000358	beta-sitosterol	PTGS2
Renshen	MOL000358	beta-sitosterol	HSP90AA1
Renshen	MOL000358	beta-sitosterol	KCNH2
Renshen	MOL000358	beta-sitosterol	DRD1
Renshen	MOL000358	beta-sitosterol	CHRM3
Renshen	MOL000358	beta-sitosterol	CHRM1
Renshen	MOL000358	beta-sitosterol	SCN5A
Renshen	MOL000358	beta-sitosterol	CHRM4
Renshen	MOL000358	beta-sitosterol	ADRA1A
Renshen	MOL000358	beta-sitosterol	CHRM2
Renshen	MOL000358	beta-sitosterol	ADRA1B
Renshen	MOL000358	beta-sitosterol	ADRB2
Renshen	MOL000358	beta-sitosterol	CHRNA2
Renshen	MOL000358	beta-sitosterol	SLC6A4
Renshen	MOL000358	beta-sitosterol	OPRM1
Renshen	MOL000358	beta-sitosterol	GABRA1
Renshen	MOL000358	beta-sitosterol	BCL2
Renshen	MOL000358	beta-sitosterol	BAX
Renshen	MOL000358	beta-sitosterol	CASP9
Renshen	MOL000358	beta-sitosterol	JUN
Renshen	MOL000358	beta-sitosterol	CASP3
Renshen	MOL000358	beta-sitosterol	CASP8
Renshen	MOL000358	beta-sitosterol	PRKCA
Renshen	MOL000358	beta-sitosterol	PON1
Renshen	MOL000358	beta-sitosterol	MAP2
Renshen	MOL003648	Inermin	PTGS1
Renshen	MOL003648	Inermin	CHRM3
Renshen	MOL003648	Inermin	SCN5A
Renshen	MOL003648	Inermin	PTGS2
Renshen	MOL003648	Inermin	HTR3A
Renshen	MOL003648	Inermin	RXRA
Renshen	MOL003648	Inermin	ADRA1B
Renshen	MOL003648	Inermin	ADRB2
Renshen	MOL003648	Inermin	ADRA1D
Renshen	MOL003648	Inermin	SLC6A4
Renshen	MOL003648	Inermin	HSP90AA1
Renshen	MOL003648	Inermin	IGHG1
Renshen	MOL003648	Inermin	PRSS1
Renshen	MOL003648	Inermin	NCOA1
Renshen	MOL003648	Inermin	CALM1
Renshen	MOL000422	kaempferol	NOS2
Renshen	MOL000422	kaempferol	PTGS1
Renshen	MOL000422	kaempferol	AR
Renshen	MOL000422	kaempferol	PPARG
Renshen	MOL000422	kaempferol	PTGS2
Renshen	MOL000422	kaempferol	HSP90AA1
Renshen	MOL000422	kaempferol	NCOA2
Renshen	MOL000422	kaempferol	DPP4
Renshen	MOL000422	kaempferol	PRSS1
Renshen	MOL000422	kaempferol	PGR
Renshen	MOL000422	kaempferol	HTR
Renshen	MOL000422	kaempferol	CHRM1
Renshen	MOL000422	kaempferol	ACHE
Renshen	MOL000422	kaempferol	SLC6A2
Renshen	MOL000422	kaempferol	CHRM2
Renshen	MOL000422	kaempferol	ADRA1B
Renshen	MOL000422	kaempferol	GABRA1
Renshen	MOL000422	kaempferol	F7
Renshen	MOL000422	kaempferol	CALM1
Renshen	MOL000422	kaempferol	RELA
Renshen	MOL000422	kaempferol	IKBKB
Renshen	MOL000422	kaempferol	AKT1
Renshen	MOL000422	kaempferol	BCL2
Renshen	MOL000422	kaempferol	BAX
Renshen	MOL000422	kaempferol	TNFSF15
Renshen	MOL000422	kaempferol	JUN
Renshen	MOL000422	kaempferol	AHSA1
Renshen	MOL000422	kaempferol	CASP3
Renshen	MOL000422	kaempferol	MAPK8
Renshen	MOL000422	kaempferol	MMP1
Renshen	MOL000422	kaempferol	STAT1
Renshen	MOL000422	kaempferol	CDK1
Renshen	MOL000422	kaempferol	PPARG
Renshen	MOL000422	kaempferol	HMOX1
Renshen	MOL000422	kaempferol	CYP3A4
Renshen	MOL000422	kaempferol	CYP1A2
Renshen	MOL000422	kaempferol	CYP1A1
Renshen	MOL000422	kaempferol	ICAM1
Renshen	MOL000422	kaempferol	SELE
Renshen	MOL000422	kaempferol	VCAM1
Renshen	MOL000422	kaempferol	NR1I2
Renshen	MOL000422	kaempferol	CYP1B1
Renshen	MOL000422	kaempferol	ALOX5
Renshen	MOL000422	kaempferol	HAS2
Renshen	MOL000422	kaempferol	GSTP1
Renshen	MOL000422	kaempferol	AHR
Renshen	MOL000422	kaempferol	PSMD3
Renshen	MOL000422	kaempferol	SLC2A4
Renshen	MOL000422	kaempferol	NR1I3
Renshen	MOL000422	kaempferol	INSRR
Renshen	MOL000422	kaempferol	DIO1
Renshen	MOL000422	kaempferol	PPP3CA
Renshen	MOL000422	kaempferol	GSTM1
Renshen	MOL000422	kaempferol	GSTM2
Renshen	MOL000422	kaempferol	AKR1C3
Renshen	MOL000422	kaempferol	SLPI
Renshen	MOL005308	Aposiopolamine	CHRM3
Renshen	MOL005308	Aposiopolamine	CHRM1
Renshen	MOL005308	Aposiopolamine	SLC6A2
Renshen	MOL005308	Aposiopolamine	SLC6A3
Renshen	MOL005308	Aposiopolamine	ADRB2
Renshen	MOL005308	Aposiopolamine	SLC6A4
Renshen	MOL005308	Aposiopolamine	GABRA1
Renshen	MOL005308	Aposiopolamine	DPP4
Renshen	MOL005317	Deoxyharringtonine	AR
Renshen	MOL005317	Deoxyharringtonine	NR3C2
Renshen	MOL005318	Dianthramine	PTGS1
Renshen	MOL005318	Dianthramine	PTGS2
Renshen	MOL005318	Dianthramine	HSP90AA1
Renshen	MOL005320	arachidonate	PTGS1
Renshen	MOL005320	arachidonate	PTGS2
Renshen	MOL005320	arachidonate	RXRG
Renshen	MOL005320	arachidonate	NCOA2
Renshen	MOL005321	Frutinone A	PTGS1
Renshen	MOL005321	Frutinone A	HTR
Renshen	MOL005321	Frutinone A	AR
Renshen	MOL005321	Frutinone A	SCN5A
Renshen	MOL005321	Frutinone A	PPARG
Renshen	MOL005321	Frutinone A	PTGS2
Renshen	MOL005321	Frutinone A	RXRA
Renshen	MOL005321	Frutinone A	ADRB2
Renshen	MOL005321	Frutinone A	GABRA1
Renshen	MOL005321	Frutinone A	DPP4
Renshen	MOL005321	Frutinone A	HSP90AA1
Renshen	MOL005321	Frutinone A	ACHE
Renshen	MOL005344	ginsenoside rh2	BAX
Renshen	MOL005344	ginsenoside rh2	TNFSF15
Renshen	MOL005344	ginsenoside rh2	CASP3
Renshen	MOL005344	ginsenoside rh2	PTGS2
Renshen	MOL005344	ginsenoside rh2	NFKBIA
Renshen	MOL005344	ginsenoside rh2	IL1B
Renshen	MOL005344	ginsenoside rh2	CASP1
Renshen	MOL005344	ginsenoside rh2	IFNGR1
Renshen	MOL005344	ginsenoside rh2	ADCYAP1
Renshen	MOL005344	ginsenoside rh2	PSMG1
Renshen	MOL005344	ginsenoside rh2	MAP2K4
Renshen	MOL005344	ginsenoside rh2	SLC2A4
Renshen	MOL005348	Ginsenoside-Rh4_qt	NR3C2
Renshen	MOL005348	Ginsenoside-Rh4_qt	NCOA2
Renshen	MOL005356	Girinimbin	PTGS1
Renshen	MOL005356	Girinimbin	SCN5A
Renshen	MOL005356	Girinimbin	PTGS2
Renshen	MOL005356	Girinimbin	RXRA
Renshen	MOL005356	Girinimbin	ADRB2
Renshen	MOL005356	Girinimbin	GABRA1
Renshen	MOL005356	Girinimbin	NCOA2
Renshen	MOL005376	Panaxadiol	NR3C1
Renshen	MOL005384	suchilactone	KCNH2
Renshen	MOL005384	suchilactone	SCN5A
Renshen	MOL005384	suchilactone	PTGS2
Renshen	MOL005384	suchilactone	F7
Renshen	MOL005384	suchilactone	ADRB2
Renshen	MOL005384	suchilactone	HSP90AA1
Renshen	MOL005384	suchilactone	NCOA1
Renshen	MOL005384	suchilactone	CALM1
Renshen	MOL005384	suchilactone	PTGS1
Renshen	MOL005384	suchilactone	RXRA
Renshen	MOL005384	suchilactone	ADRA1D
Renshen	MOL005399	alexandrin_qt	PGR
Renshen	MOL000787	Fumarine	PTGS1
Renshen	MOL000787	Fumarine	CHRM3
Renshen	MOL000787	Fumarine	KCNH2
Renshen	MOL000787	Fumarine	CHRM1
Renshen	MOL000787	Fumarine	SCN5A
Renshen	MOL000787	Fumarine	CHRM5
Renshen	MOL000787	Fumarine	PTGS2
Renshen	MOL000787	Fumarine	HTR3A
Renshen	MOL000787	Fumarine	F7
Renshen	MOL000787	Fumarine	CHRM4
Renshen	MOL000787	Fumarine	OPRD1
Renshen	MOL000787	Fumarine	ADRA1B
Renshen	MOL000787	Fumarine	ADRB2
Renshen	MOL000787	Fumarine	ADRA1D
Renshen	MOL000787	Fumarine	OPRM1
Renshen	MOL000787	Fumarine	HSP90AA1
Renshen	MOL000787	Fumarine	CALM1
Renshen	MOL000787	Fumarine	SLC6A4
Renshen	MOL000787	Fumarine	CACNA1S
Renshen	MOL000787	Fumarine	SLC6A3
Renshen	MOL000787	Fumarine	DRD1
Renshen	MOL000787	Fumarine	KDR

## Sheet: Table S2
Table S2 The results of GO enrichment analysis.
	ID	Description	pvalue	p.adjust	qvalue	geneID	Count
biological process	GO:0051090	regulation of DNA-binding transcription factor activity	2.8e-18	4.1e-15	2.18e-15	APP/TRAF6/AKT1/FLNA/RNF2/RPS27A/HDAC2/NTRK1/UBC/HDAC5/NPM1/EZH2/JUN/ARRB2/ESR1/AR/EP300/RELA/IKBKG/RB1/COPS5/CTNNB1/SMAD3/MAPK1	24
	GO:0051052	regulation of DNA metabolic process	4.66e-16	2.49e-13	1.33e-13	HNRNPU/RPA2/CDK2/MYC/TP53/HNRNPA1/AKT1/CDK1/PARP1/PCNA/FUS/NPM1/JUN/ARRB2/HSP90AA1/HSP90AB1/SRC/CTNNB1/EGFR/MAPK1/PRKDC/BRCA1	22
	GO:1901987	regulation of cell cycle phase transition	4.77e-15	1.92e-12	1.02e-12	APP/RPA2/CDK2/TP53/AKT1/CDK1/PCNA/NPM1/EZH2/CUL3/CUL1/CUL4B/HSP90AA1/YWHAG/YWHAE/EP300/TUBB/RB1/EGFR/PRKDC/BRCA1/MDM2	22
	GO:0000082	G1/S transition of mitotic cell cycle	9.83e-19	3.16e-15	1.68e-15	RPA2/CDK2/RPA1/MYC/RPA3/TP53/AKT1/CDK1/CUL5/PCNA/EZH2/CUL3/CUL1/CUL2/CUL4B/MCM2/EP300/RB1/EGFR/PRKDC/MDM2	21
	GO:0044843	cell cycle G1/S phase transition	3.82e-18	4.1e-15	2.18e-15	RPA2/CDK2/RPA1/MYC/RPA3/TP53/AKT1/CDK1/CUL5/PCNA/EZH2/CUL3/CUL1/CUL2/CUL4B/MCM2/EP300/RB1/EGFR/PRKDC/MDM2	21
	GO:1901990	regulation of mitotic cell cycle phase transition	1.17e-14	3.43e-12	1.83e-12	APP/RPA2/CDK2/TP53/AKT1/CDK1/PCNA/EZH2/CUL3/CUL1/CUL4B/HSP90AA1/YWHAG/YWHAE/EP300/TUBB/RB1/EGFR/PRKDC/BRCA1/MDM2	21
	GO:0009314	response to radiation	1.4e-14	3.75e-12	2e-12	APP/GRB2/MYC/TP53/AKT1/PARP1/PCNA/NTRK1/XRCC6/NPM1/JUN/CUL4B/HSPA5/EP300/RELA/VCAM1/EGFR/PRKDC/BRCA1/CREBBP/MDM2	21
	GO:2001233	regulation of apoptotic signaling pathway	2.54e-14	5.45e-12	2.9e-12	TP53/HNRNPK/AKT1/PARP1/HDAC1/ARRB2/AR/HSPB1/YWHAZ/YWHAG/YWHAE/YWHAB/RELA/RB1/SRC/YWHAQ/CTNNB1/SMAD3/BRCA1/MDM2	20
	GO:0060249	anatomical structure homeostasis	1.01e-13	1.71e-11	9.1e-12	HNRNPU/TRAF6/RPA2/RPA1/MYC/RPA3/HNRNPA1/PARP1/PCNA/XRCC6/HSP90AA1/HSP90AB1/HSPB1/ACTB/RB1/SRC/CTNNB1/EGFR/MAPK1/PRKDC	20
	GO:0048511	rhythmic process	9.4e-16	4.32e-13	2.3e-13	HNRNPU/TP53/CDK1/PCNA/HDAC2/NTRK1/HDAC1/EZH2/JUN/ARRB2/TARDBP/ESR1/HSPA5/EP300/SRC/HUWE1/EGFR/PRKDC/CREBBP	19
	GO:0035690	cellular response to drug	5.51e-14	1.11e-11	5.9e-12	CDK2/MYC/TP53/HNRNPA1/CDK1/PCNA/HDAC2/NTRK1/EZH2/HSP90AB1/HSPA5/RELA/ACTB/SRC/CTNNB1/EGFR/MAPK1/BRCA1/MDM2	19
	GO:0016570	histone modification	2.19e-12	2.07e-10	1.1e-10	CDK2/TP53/RNF2/CDK1/SUZ12/HDAC2/HDAC1/EED/HDAC5/EZH2/CUL4B/EP300/HUWE1/CTNNB1/SIRT7/SNW1/BRCA1/BMI1/CREBBP	19
	GO:0016569	covalent chromatin modification	4.64e-12	4.15e-10	2.21e-10	CDK2/TP53/RNF2/CDK1/SUZ12/HDAC2/HDAC1/EED/HDAC5/EZH2/CUL4B/EP300/HUWE1/CTNNB1/SIRT7/SNW1/BRCA1/BMI1/CREBBP	19
	GO:0051054	positive regulation of DNA metabolic process	1.61e-16	1.29e-13	6.89e-14	CDK2/MYC/HNRNPA1/AKT1/CDK1/PARP1/PCNA/FUS/JUN/ARRB2/HSP90AA1/HSP90AB1/SRC/CTNNB1/EGFR/MAPK1/PRKDC/BRCA1	18
	GO:0016579	protein deubiquitination	7.2e-15	2.32e-12	1.23e-12	TRAF6/MYC/TP53/CDK1/RPS27A/UBC/ARRB2/ESR1/AR/EP300/ACTB/IKBKG/COPS5/SMAD2/SMAD3/VCP/BRCA1/MDM2	18
	GO:0070646	protein modification by small protein removal	1.87e-14	4.41e-12	2.35e-12	TRAF6/MYC/TP53/CDK1/RPS27A/UBC/ARRB2/ESR1/AR/EP300/ACTB/IKBKG/COPS5/SMAD2/SMAD3/VCP/BRCA1/MDM2	18
	GO:1903829	positive regulation of cellular protein localization	7.46e-14	1.41e-11	7.51e-12	TP53/AKT1/FLNA/CDK1/PARP1/TARDBP/HSP90AB1/YWHAZ/YWHAG/YWHAE/YWHAB/SRC/YWHAQ/HUWE1/SMAD3/EGFR/MAPK1/MDM2	18
	GO:0010948	negative regulation of cell cycle process	4.72e-13	5.23e-11	2.78e-11	RPA2/CDK2/TP53/RNF2/CDK1/SUZ12/PCNA/EED/NPM1/EZH2/CUL1/HSP90AB1/EP300/RB1/PRKDC/BRCA1/BMI1/MDM2	18
	GO:0051098	regulation of binding	8.2e-13	8.79e-11	4.68e-11	APP/TRAF6/AKT1/PARP1/HDAC2/HDAC5/JUN/ARRB2/ITGA4/HSP90AB1/HSPA5/EP300/ACTB/RB1/SRC/SMAD2/CTNNB1/SMAD3	18
	GO:0045787	positive regulation of cell cycle	1.66e-12	1.63e-10	8.66e-11	APP/HNRNPU/CDK2/TP53/AKT1/CDK1/PCNA/NPM1/EZH2/CUL3/CUL4B/HSP90AB1/EP300/RB1/SRC/EGFR/BRCA1/MDM2	18
	GO:0043161	proteasome-mediated ubiquitin-dependent protein catabolic process	5.76e-12	5.01e-10	2.67e-10	CDK2/AKT1/CDK1/CUL5/RPS27A/UBC/ARRB2/CUL3/CUL1/CUL2/CUL4B/HSP90AB1/HSPA5/SMURF1/CTNNB1/VCP/FBXO6/MDM2	18
	GO:0006979	response to oxidative stress	1.95e-11	1.36e-09	7.26e-10	APP/STAU1/CDK2/TP53/AKT1/CDK1/PARP1/PCNA/HDAC2/EZH2/JUN/HSPB1/RELA/SRC/CTNNB1/EGFR/MAPK1/MDM2	18
	GO:0043254	regulation of protein complex assembly	3.46e-11	2.22e-09	1.18e-09	CAND1/GRB2/RPA2/RPA1/RPA3/TP53/PARP1/JUN/ESR1/CUL4B/PAN2/HSP90AA1/HSPA8/EP300/RB1/SRC/CTNNB1/VCP	18
	GO:0010498	proteasomal protein catabolic process	4.89e-11	2.97e-09	1.58e-09	CDK2/AKT1/CDK1/CUL5/RPS27A/UBC/ARRB2/CUL3/CUL1/CUL2/CUL4B/HSP90AB1/HSPA5/SMURF1/CTNNB1/VCP/FBXO6/MDM2	18
	GO:0071897	DNA biosynthetic process	2.46e-16	1.58e-13	8.43e-14	HNRNPU/RPA2/RPA1/MYC/RPA3/TP53/HNRNPA1/PCNA/RPS27A/UBC/ARRB2/HSP90AA1/HSP90AB1/SRC/CTNNB1/VCP/MAPK1	17
	GO:0030522	intracellular receptor signaling pathway	9.3e-14	1.66e-11	8.84e-12	TRAF6/PARP1/RPS27A/HDAC1/UBC/EZH2/ARRB2/ESR1/AR/EP300/RELA/IKBKG/RB1/SRC/CTNNB1/SNW1/BRCA1	17
	GO:0097193	intrinsic apoptotic signaling pathway	1.56e-13	2.28e-11	1.21e-11	TP53/HNRNPK/AKT1/PARP1/CUL5/HDAC1/CUL3/CUL1/CUL2/HSPB1/EP300/SRC/IKBKE/PRKDC/SNW1/BRCA1/MDM2	17
	GO:0034599	cellular response to oxidative stress	3.19e-13	3.96e-11	2.11e-11	STAU1/CDK2/TP53/AKT1/CDK1/PARP1/PCNA/HDAC2/EZH2/JUN/HSPB1/RELA/SRC/CTNNB1/EGFR/MAPK1/MDM2	17
	GO:0009266	response to temperature stimulus	1.52e-13	2.28e-11	1.21e-11	RPA2/RPA1/RPA3/AKT1/HDAC2/NTRK1/ARRB2/HSP90AA1/HSP90AB1/HSPA5/HSPA8/YWHAE/EP300/VCP/MAPK1/CREBBP	16
	GO:0071560	cellular response to transforming growth factor beta stimulus	2.21e-13	3.1e-11	1.65e-11	TP53/PARP1/RPS27A/HDAC2/UBC/JUN/ARRB2/HSP90AB1/HSPA5/EP300/SMURF1/SRC/SMAD2/SMAD3/SNW1/CREBBP	16
	GO:0071559	response to transforming growth factor beta	3.2e-13	3.96e-11	2.11e-11	TP53/PARP1/RPS27A/HDAC2/UBC/JUN/ARRB2/HSP90AB1/HSPA5/EP300/SMURF1/SRC/SMAD2/SMAD3/SNW1/CREBBP	16
	GO:0051091	positive regulation of DNA-binding transcription factor activity	4.58e-13	5.23e-11	2.78e-11	APP/TRAF6/AKT1/RPS27A/NTRK1/UBC/HDAC5/NPM1/ESR1/AR/EP300/RELA/IKBKG/COPS5/CTNNB1/SMAD3	16
	GO:0031647	regulation of protein stability	1.67e-12	1.63e-10	8.66e-11	CDC37/TP53/FLNA/CUL3/TARDBP/HSP90AA1/HSP90AB1/HSPA8/EP300/SRC/VHL/SMAD3/MAPK1/PRKDC/CREBBP/MDM2	16
	GO:0090068	positive regulation of cell cycle process	3.47e-12	3.19e-10	1.7e-10	APP/HNRNPU/CDK2/TP53/AKT1/CDK1/PCNA/NPM1/EZH2/CUL3/CUL4B/EP300/RB1/EGFR/BRCA1/MDM2	16
	GO:0045088	regulation of innate immune response	1.64e-09	5.87e-08	3.13e-08	CDC37/TRAF6/RPS27A/XRCC6/UBC/ARRB2/CUL1/ESR1/HSP90AB1/EP300/RELA/IKBKG/SRC/IKBKE/PRKDC/CREBBP	16
	GO:0000723	telomere maintenance	6.05e-15	2.16e-12	1.15e-12	HNRNPU/RPA2/RPA1/MYC/RPA3/HNRNPA1/PARP1/PCNA/XRCC6/HSP90AA1/HSP90AB1/SRC/CTNNB1/MAPK1/PRKDC	15
	GO:0032200	telomere organization	1.92e-14	4.41e-12	2.35e-12	HNRNPU/RPA2/RPA1/MYC/RPA3/HNRNPA1/PARP1/PCNA/XRCC6/HSP90AA1/HSP90AB1/SRC/CTNNB1/MAPK1/PRKDC	15
	GO:0007179	transforming growth factor beta receptor signaling pathway	1.29e-13	2.07e-11	1.1e-11	TP53/PARP1/RPS27A/UBC/JUN/ARRB2/HSP90AB1/HSPA5/EP300/SMURF1/SRC/SMAD2/SMAD3/SNW1/CREBBP	15
	GO:1903320	regulation of protein modification by small protein conjugation or removal	1.14e-12	1.18e-10	6.28e-11	TRAF6/AKT1/U2AF2/ARRB2/CUL3/HSP90AA1/HSP90AB1/HSPA5/RELA/HUWE1/CTNNB1/VCP/BRCA1/UBE2I/BMI1	15
	GO:0072331	signal transduction by p53 class mediator	9.15e-12	7.54e-10	4.02e-10	RPA2/CDK2/RPA1/RPA3/TP53/HNRNPK/AKT1/CDK1/PCNA/HDAC2/HDAC1/EP300/SNW1/BRCA1/MDM2	15
	GO:0031334	positive regulation of protein complex assembly	9.65e-12	7.76e-10	4.13e-10	CAND1/GRB2/RPA2/RPA1/RPA3/TP53/PARP1/JUN/ESR1/CUL4B/PAN2/HSP90AA1/SRC/CTNNB1/VCP	15
	GO:1903311	regulation of mRNA metabolic process	1.41e-10	7.94e-09	4.23e-09	HNRNPU/HNRNPK/HNRNPA1/AKT1/RPS27A/U2AF2/UBC/NPM1/TARDBP/HSPB1/HSPA8/YWHAZ/YWHAB/XPO1/SNW1	15
	GO:0045930	negative regulation of mitotic cell cycle	2.54e-10	1.24e-08	6.58e-09	RPA2/CDK2/TP53/CDK1/PCNA/EZH2/CUL1/EP300/RB1/CTNNB1/SMAD3/EGFR/PRKDC/BRCA1/MDM2	15
	GO:0007178	transmembrane receptor protein serine/threonine kinase signaling pathway	3.96e-10	1.79e-08	9.54e-09	TP53/PARP1/RPS27A/UBC/JUN/ARRB2/HSP90AB1/HSPA5/EP300/SMURF1/SRC/SMAD2/SMAD3/SNW1/CREBBP	15
	GO:0048545	response to steroid hormone	1.52e-09	5.57e-08	2.97e-08	HNRNPU/PARP1/PCNA/HDAC1/ARRB2/ESR1/AR/EP300/RELA/RB1/SRC/CTNNB1/EGFR/BRCA1/MDM2	15
	GO:0006605	protein targeting	7.25e-09	1.96e-07	1.04e-07	RPL10/CDC37/RPS27A/UBC/HSP90AA1/HSPA5/HSPA8/HSPA4/YWHAZ/YWHAG/YWHAE/YWHAB/SMURF1/YWHAQ/HUWE1	15
	GO:0048732	gland development	7.71e-09	2.02e-07	1.07e-07	AKT1/PCNA/EZH2/JUN/CUL3/ESR1/AR/RELA/SRC/SMAD2/CTNNB1/SMAD3/EGFR/MAPK1/PRKDC	15
	GO:0031667	response to nutrient levels	4.91e-08	9.28e-07	4.94e-07	TP53/HNRNPA1/AKT1/PCNA/NTRK1/JUN/HSPA5/HSPA8/RELA/SRC/VCAM1/EGFR/MAPK1/SNW1/MDM2	15
	GO:0009408	response to heat	4.26e-13	5.07e-11	2.7e-11	RPA2/RPA1/RPA3/AKT1/HDAC2/HSP90AA1/HSP90AB1/HSPA5/HSPA8/YWHAE/EP300/VCP/MAPK1/CREBBP	14
	GO:0071824	protein-DNA complex subunit organization	3.22e-10	1.5e-08	8e-09	CAND1/RPA2/RPA1/MYC/RPA3/TP53/PARP1/RPS27A/UBC/NPM1/ESR1/CUL4B/MCM2/RB1	14
	GO:0002218	activation of innate immune response	1.22e-09	4.79e-08	2.55e-08	TRAF6/RPS27A/XRCC6/UBC/ARRB2/CUL1/ESR1/EP300/RELA/IKBKG/SRC/IKBKE/PRKDC/CREBBP	14
	GO:0071214	cellular response to abiotic stimulus	1.97e-09	6.53e-08	3.47e-08	GRB2/MYC/TP53/AKT1/PARP1/PCNA/XRCC6/NPM1/CUL4B/HSPA5/EP300/EGFR/CREBBP/MDM2	14
	GO:0104004	cellular response to environmental stimulus	1.97e-09	6.53e-08	3.47e-08	GRB2/MYC/TP53/AKT1/PARP1/PCNA/XRCC6/NPM1/CUL4B/HSPA5/EP300/EGFR/CREBBP/MDM2	14
	GO:0033044	regulation of chromosome organization	2.99e-09	9.35e-08	4.98e-08	HNRNPU/MYC/TP53/HNRNPA1/PARP1/EED/CUL3/MCM2/RB1/SRC/CTNNB1/MAPK1/SNW1/BRCA1	14
	GO:0043687	post-translational protein modification	5.97e-09	1.65e-07	8.81e-08	CAND1/APP/FN1/CUL5/CUL3/CUL1/CUL2/CUL4B/OBSL1/CUL7/COPS5/CCDC8/VHL/FBXO6	14
	GO:0045089	positive regulation of innate immune response	1.18e-08	2.9e-07	1.54e-07	TRAF6/RPS27A/XRCC6/UBC/ARRB2/CUL1/ESR1/EP300/RELA/IKBKG/SRC/IKBKE/PRKDC/CREBBP	14
	GO:1901653	cellular response to peptide	1.35e-08	3.27e-07	1.74e-07	APP/GRB2/TP53/AKT1/CDC5L/PARP1/HDAC5/ITGA4/YWHAG/RELA/SRC/VCAM1/PRKDC/MDM2	14
	GO:0070482	response to oxygen levels	1.8e-08	4.03e-07	2.14e-07	MYC/TP53/AKT1/RPS27A/HDAC2/UBC/CUL2/EP300/SRC/VHL/SMAD3/VCAM1/CREBBP/MDM2	14
	GO:0048608	reproductive structure development	5.52e-08	1.02e-06	5.43e-07	GRB2/AKT1/FLNA/NTRK1/ARRB2/ESR1/AR/HSP90AB1/HSPA5/CUL7/SRC/CTNNB1/EGFR/MAPK1	14
	GO:0061458	reproductive system development	6.02e-08	1.09e-06	5.82e-07	GRB2/AKT1/FLNA/NTRK1/ARRB2/ESR1/AR/HSP90AB1/HSPA5/CUL7/SRC/CTNNB1/EGFR/MAPK1	14
	GO:1904951	positive regulation of establishment of protein localization	1.11e-07	1.86e-06	9.91e-07	TP53/FLNA/TARDBP/YWHAZ/YWHAG/YWHAE/YWHAB/SRC/YWHAQ/HUWE1/SMAD3/EGFR/MAPK1/MDM2	14
	GO:0050769	positive regulation of neurogenesis	1.78e-07	2.83e-06	1.5e-06	FN1/FLNA/HDAC2/NTRK1/HDAC1/EZH2/OBSL1/HSPA5/EP300/RELA/CUL7/SMURF1/CTNNB1/SNW1	14
	GO:0034605	cellular response to heat	3.17e-13	3.96e-11	2.11e-11	RPA2/RPA1/RPA3/HDAC2/HSP90AA1/HSP90AB1/HSPA5/HSPA8/YWHAE/EP300/VCP/MAPK1/CREBBP	13
	GO:2000045	regulation of G1/S transition of mitotic cell cycle	1.4e-11	1.02e-09	5.44e-10	RPA2/CDK2/TP53/AKT1/CDK1/PCNA/EZH2/CUL4B/EP300/RB1/EGFR/PRKDC/MDM2	13
	GO:1902806	regulation of cell cycle G1/S phase transition	4.54e-11	2.8e-09	1.49e-09	RPA2/CDK2/TP53/AKT1/CDK1/PCNA/EZH2/CUL4B/EP300/RB1/EGFR/PRKDC/MDM2	13
	GO:0007623	circadian rhythm	6.54e-11	3.9e-09	2.07e-09	HNRNPU/TP53/CDK1/HDAC2/NTRK1/HDAC1/EZH2/JUN/TARDBP/EP300/HUWE1/EGFR/PRKDC	13
	GO:0065004	protein-DNA complex assembly	5.78e-10	2.41e-08	1.29e-08	CAND1/RPA2/RPA1/RPA3/TP53/PARP1/RPS27A/UBC/NPM1/ESR1/CUL4B/MCM2/RB1	13
	GO:0034504	protein localization to nucleus	1.13e-09	4.49e-08	2.39e-08	HNRNPU/TP53/AKT1/FLNA/CDK1/PARP1/TARDBP/YWHAE/XPO1/SRC/SMAD3/MAPK1/MDM2	13
	GO:0007249	I-kappaB kinase/NF-kappaB signaling	1.56e-09	5.63e-08	3e-08	TRAF6/AKT1/FLNA/RPS27A/HDAC1/UBC/ESR1/HSPB1/RELA/IKBKG/CTNNB1/IKBKE/UBE2I	13
	GO:0009416	response to light stimulus	1e-08	2.52e-07	1.34e-07	APP/MYC/TP53/AKT1/PARP1/PCNA/NPM1/CUL4B/EP300/RELA/EGFR/CREBBP/MDM2	13
	GO:0018209	peptidyl-serine modification	1.35e-08	3.27e-07	1.74e-07	APP/CDK2/AKT1/CDK1/PARP1/ARRB2/HSP90AA1/HSP90AB1/SRC/EGFR/MAPK1/IKBKE/PRKDC	13
	GO:0046677	response to antibiotic	1.62e-08	3.73e-07	1.99e-07	TP53/HNRNPA1/CDK1/PCNA/HDAC2/EZH2/JUN/HSP90AA1/HSPA5/RELA/SRC/VCAM1/MDM2	13
	GO:0090150	establishment of protein localization to membrane	1.94e-08	4.22e-07	2.25e-07	RPL10/TP53/UBL4A/RPS27A/HSP90AA1/HSPA5/HSPA4/YWHAZ/YWHAG/YWHAE/YWHAB/YWHAQ/EGFR	13
	GO:0006913	nucleocytoplasmic transport	2.86e-08	5.85e-07	3.11e-07	TP53/HNRNPA1/AKT1/FLNA/U2AF2/NPM1/TARDBP/YWHAE/XPO1/SMURF1/SMAD3/MAPK1/MDM2	13
	GO:0051169	nuclear transport	3.16e-08	6.4e-07	3.41e-07	TP53/HNRNPA1/AKT1/FLNA/U2AF2/NPM1/TARDBP/YWHAE/XPO1/SMURF1/SMAD3/MAPK1/MDM2	13
	GO:0001666	response to hypoxia	4.88e-08	9.27e-07	4.94e-07	MYC/TP53/AKT1/RPS27A/UBC/CUL2/EP300/SRC/VHL/SMAD3/VCAM1/CREBBP/MDM2	13
	GO:0006402	mRNA catabolic process	5.73e-08	1.05e-06	5.6e-07	HNRNPU/RPL10/AKT1/RPS27A/UBC/NPM1/TARDBP/PAN2/HSPB1/HSPA8/YWHAZ/YWHAB/XPO1	13
	GO:0036293	response to decreased oxygen levels	6.93e-08	1.23e-06	6.57e-07	MYC/TP53/AKT1/RPS27A/UBC/CUL2/EP300/SRC/VHL/SMAD3/VCAM1/CREBBP/MDM2	13
	GO:0042176	regulation of protein catabolic process	9.74e-08	1.67e-06	8.91e-07	AKT1/FLNA/EEF1A1/CUL4B/HSP90AA1/HSP90AB1/RELA/XPO1/SMURF1/SMAD3/VCP/EGFR/MDM2	13
	GO:0006401	RNA catabolic process	1.57e-07	2.55e-06	1.36e-06	HNRNPU/RPL10/AKT1/RPS27A/UBC/NPM1/TARDBP/PAN2/HSPB1/HSPA8/YWHAZ/YWHAB/XPO1	13
	GO:0001819	positive regulation of cytokine production	9.18e-07	1.24e-05	6.58e-06	APP/TRAF6/HDAC2/XRCC6/HSPB1/EP300/RELA/SRC/CTNNB1/SMAD3/PRKDC/BRCA1/CREBBP	13
	GO:0006914	autophagy	1.93e-06	2.32e-05	1.23e-05	CDC37/TP53/AKT1/EEF1A1/HSP90AA1/HSPB1/HSPA8/EP300/IKBKG/SMURF1/SRC/VCP/CLTC	13
	GO:0061919	process utilizing autophagic mechanism	1.93e-06	2.32e-05	1.23e-05	CDC37/TP53/AKT1/EEF1A1/HSP90AA1/HSPB1/HSPA8/EP300/IKBKG/SMURF1/SRC/VCP/CLTC	13
	GO:0009411	response to UV	1e-11	7.84e-10	4.17e-10	MYC/TP53/AKT1/PARP1/PCNA/NPM1/CUL4B/EP300/RELA/EGFR/CREBBP/MDM2	12
	GO:0034614	cellular response to reactive oxygen species	7.89e-11	4.61e-09	2.46e-09	CDK2/AKT1/CDK1/PCNA/HDAC2/EZH2/JUN/RELA/SRC/EGFR/MAPK1/MDM2	12
	GO:1901796	regulation of signal transduction by p53 class mediator	1.76e-10	9e-09	4.79e-09	RPA2/CDK2/RPA1/RPA3/TP53/HNRNPK/AKT1/HDAC2/HDAC1/EP300/BRCA1/MDM2	12
	GO:0071478	cellular response to radiation	3.5e-10	1.61e-08	8.57e-09	GRB2/MYC/TP53/PARP1/PCNA/XRCC6/NPM1/CUL4B/HSPA5/EP300/CREBBP/MDM2	12
	GO:0035966	response to topologically incorrect protein	5.62e-10	2.38e-08	1.27e-08	CUL3/HSP90AA1/HSP90AB1/HSPB1/HSPA5/HSPA8/HSPA4/EP300/CUL7/COPS5/VCP/FBXO6	12
	GO:0000075	cell cycle checkpoint	1.44e-09	5.37e-08	2.86e-08	RPA2/CDK2/TP53/CDC5L/CDK1/PCNA/EP300/RB1/PRKDC/BRCA1/FBXO6/MDM2	12
	GO:0000302	response to reactive oxygen species	3.23e-09	9.8e-08	5.22e-08	CDK2/AKT1/CDK1/PCNA/HDAC2/EZH2/JUN/RELA/SRC/EGFR/MAPK1/MDM2	12
	GO:0090092	regulation of transmembrane receptor protein serine/threonine kinase signaling pathway	4.96e-09	1.42e-07	7.58e-08	TP53/PARP1/RPS27A/UBC/HSP90AB1/HSPA5/EP300/SMURF1/SMAD2/SMAD3/SNW1/CREBBP	12
	GO:1901991	negative regulation of mitotic cell cycle phase transition	6.84e-09	1.86e-07	9.93e-08	RPA2/CDK2/TP53/CDK1/PCNA/EZH2/CUL1/EP300/RB1/PRKDC/BRCA1/MDM2	12
	GO:0071383	cellular response to steroid hormone stimulus	7.49e-09	1.99e-07	1.06e-07	HNRNPU/PARP1/HDAC1/ARRB2/ESR1/AR/EP300/RB1/SRC/CTNNB1/EGFR/BRCA1	12
	GO:1901988	negative regulation of cell cycle phase transition	1.56e-08	3.66e-07	1.95e-07	RPA2/CDK2/TP53/CDK1/PCNA/EZH2/CUL1/EP300/RB1/PRKDC/BRCA1/MDM2	12
	GO:0090287	regulation of cellular response to growth factor stimulus	4.19e-08	8.22e-07	4.38e-07	TP53/RPS27A/UBC/HSP90AB1/HSPA5/EP300/SMURF1/SMAD2/CTNNB1/SMAD3/SNW1/CREBBP	12
	GO:0002758	innate immune response-activating signal transduction	5.24e-08	9.85e-07	5.25e-07	TRAF6/RPS27A/UBC/ARRB2/CUL1/ESR1/EP300/RELA/IKBKG/SRC/IKBKE/CREBBP	12
	GO:0018105	peptidyl-serine phosphorylation	5.44e-08	1.02e-06	5.41e-07	APP/CDK2/AKT1/CDK1/ARRB2/HSP90AA1/HSP90AB1/SRC/EGFR/MAPK1/IKBKE/PRKDC	12
	GO:0007568	aging	1.18e-07	1.96e-06	1.04e-06	APP/GRB2/TP53/AKT1/CDK1/NTRK1/NPM1/JUN/RELA/VCAM1/MAPK1/PRKDC	12
	GO:0071902	positive regulation of protein serine/threonine kinase activity	1.81e-07	2.86e-06	1.52e-06	TRAF6/AKT1/CDK1/RPS27A/NTRK1/UBC/EZH2/HSP90AB1/IKBKG/SRC/EGFR/MAPK1	12
	GO:0071496	cellular response to external stimulus	2.12e-07	3.28e-06	1.75e-06	TP53/HNRNPA1/AKT1/JUN/ITGA4/HSPA5/HSPA8/VCAM1/EGFR/MAPK1/SNW1/MDM2	12
	GO:0070997	neuron death	2.81e-07	4.16e-06	2.22e-06	APP/TP53/AKT1/PARP1/NTRK1/JUN/ARRB2/HSP90AB1/HSPA5/IKBKG/RB1/CTNNB1	12
	GO:0010038	response to metal ion	4.54e-07	6.57e-06	3.5e-06	APP/AKT1/CDK1/PARP1/PCNA/FUS/JUN/HSPA5/VCAM1/EGFR/MAPK1/MDM2	12
	GO:0001701	in utero embryonic development	5.88e-07	8.22e-06	4.37e-06	GRB2/MYH9/TRAF6/TP53/AKT1/CUL3/AR/SMAD2/CTNNB1/SMAD3/EGFR/MAPK1	12
	GO:0018205	peptidyl-lysine modification	1.13e-06	1.47e-05	7.85e-06	SUZ12/HDAC2/EED/EZH2/EP300/RELA/CTNNB1/SNW1/BRCA1/UBE2I/CREBBP/MDM2	12
	GO:0030099	myeloid cell differentiation	1.84e-06	2.24e-05	1.19e-05	APP/MYH9/TRAF6/MYC/PARP1/HDAC1/JUN/EP300/RB1/SRC/CTNNB1/CREBBP	12
	GO:0050673	epithelial cell proliferation	2.86e-06	3.33e-05	1.77e-05	MYC/AKT1/JUN/ITGA4/ESR1/AR/RB1/CTNNB1/SMAD3/EGFR/MAPK1/PRKDC	12
	GO:0002429	immune response-activating cell surface receptor signaling pathway	6.87e-06	7.12e-05	3.79e-05	GRB2/TRAF6/CUL1/HSP90AA1/HSP90AB1/EP300/RELA/ACTB/IKBKG/SRC/MAPK1/CREBBP	12
	GO:0016049	cell growth	8.66e-06	8.49e-05	4.52e-05	APP/FN1/TP53/AKT1/ITGA4/HSP90AA1/HSP90AB1/SMURF1/RB1/CTNNB1/SMAD3/EGFR	12
	GO:0006289	nucleotide-excision repair	1.18e-11	8.8e-10	4.68e-10	RPA2/RPA1/RPA3/TP53/PARP1/PCNA/RPS27A/UBC/CUL4B/EP300/COPS5	11
	GO:0017015	regulation of transforming growth factor beta receptor signaling pathway	3.4e-11	2.22e-09	1.18e-09	TP53/RPS27A/UBC/HSP90AB1/HSPA5/EP300/SMURF1/SMAD2/SMAD3/SNW1/CREBBP	11
	GO:1903844	regulation of cellular response to transforming growth factor beta stimulus	4.07e-11	2.57e-09	1.37e-09	TP53/RPS27A/UBC/HSP90AB1/HSPA5/EP300/SMURF1/SMAD2/SMAD3/SNW1/CREBBP	11
	GO:0000077	DNA damage checkpoint	2.66e-10	1.27e-08	6.75e-09	RPA2/CDK2/TP53/CDC5L/CDK1/PCNA/EP300/PRKDC/BRCA1/FBXO6/MDM2	11
	GO:0031570	DNA integrity checkpoint	6.24e-10	2.57e-08	1.37e-08	RPA2/CDK2/TP53/CDC5L/CDK1/PCNA/EP300/PRKDC/BRCA1/FBXO6/MDM2	11
	GO:0006986	response to unfolded protein	2.1e-09	6.9e-08	3.67e-08	HSP90AA1/HSP90AB1/HSPB1/HSPA5/HSPA8/HSPA4/EP300/CUL7/COPS5/VCP/FBXO6	11
	GO:0043488	regulation of mRNA stability	2.23e-09	7.18e-08	3.82e-08	HNRNPU/AKT1/RPS27A/UBC/NPM1/TARDBP/HSPB1/HSPA8/YWHAZ/YWHAB/XPO1	11
	GO:0010821	regulation of mitochondrion organization	3e-09	9.35e-08	4.98e-08	CDC37/TP53/AKT1/ARRB2/YWHAZ/YWHAG/YWHAE/YWHAB/SMURF1/YWHAQ/HUWE1	11
	GO:0043487	regulation of RNA stability	3.17e-09	9.72e-08	5.17e-08	HNRNPU/AKT1/RPS27A/UBC/NPM1/TARDBP/HSPB1/HSPA8/YWHAZ/YWHAB/XPO1	11
	GO:1905475	regulation of protein localization to membrane	3.98e-09	1.16e-07	6.2e-08	TP53/AKT1/AR/YWHAZ/YWHAG/YWHAE/YWHAB/ACTB/YWHAQ/EGFR/CLTC	11
	GO:0061013	regulation of mRNA catabolic process	7.64e-09	2.01e-07	1.07e-07	HNRNPU/AKT1/RPS27A/UBC/NPM1/TARDBP/HSPB1/HSPA8/YWHAZ/YWHAB/XPO1	11
	GO:0031396	regulation of protein ubiquitination	9.89e-09	2.5e-07	1.33e-07	TRAF6/AKT1/U2AF2/ARRB2/CUL3/HSP90AA1/HSP90AB1/HSPA5/HUWE1/BRCA1/BMI1	11
	GO:0071456	cellular response to hypoxia	1.15e-08	2.85e-07	1.52e-07	MYC/TP53/AKT1/RPS27A/UBC/CUL2/EP300/SRC/VHL/CREBBP/MDM2	11
	GO:1902749	regulation of cell cycle G2/M phase transition	1.55e-08	3.66e-07	1.95e-07	APP/CDK2/TP53/CDK1/NPM1/CUL1/HSP90AA1/YWHAG/YWHAE/TUBB/BRCA1	11
	GO:2001020	regulation of response to DNA damage stimulus	1.62e-08	3.73e-07	1.99e-07	RPA2/MYC/TP53/HNRNPK/PARP1/PCNA/FUS/EGFR/PRKDC/BRCA1/MDM2	11
	GO:0036294	cellular response to decreased oxygen levels	1.88e-08	4.12e-07	2.19e-07	MYC/TP53/AKT1/RPS27A/UBC/CUL2/EP300/SRC/VHL/CREBBP/MDM2	11
	GO:2001234	negative regulation of apoptotic signaling pathway	3.42e-08	6.85e-07	3.65e-07	AKT1/HDAC1/ARRB2/AR/HSPB1/RELA/RB1/SRC/CTNNB1/BRCA1/MDM2	11
	GO:0071453	cellular response to oxygen levels	4.08e-08	8.04e-07	4.28e-07	MYC/TP53/AKT1/RPS27A/UBC/CUL2/EP300/SRC/VHL/CREBBP/MDM2	11
	GO:0007050	cell cycle arrest	4.64e-08	8.88e-07	4.73e-07	CDK2/MYC/TP53/CDK1/PCNA/HSP90AB1/EP300/RB1/SMAD3/BRCA1/MDM2	11
	GO:0043122	regulation of I-kappaB kinase/NF-kappaB signaling	4.64e-08	8.88e-07	4.73e-07	TRAF6/AKT1/FLNA/HDAC1/ESR1/HSPB1/RELA/IKBKG/CTNNB1/IKBKE/UBE2I	11
	GO:0038093	Fc receptor signaling pathway	5.51e-08	1.02e-06	5.43e-07	GRB2/TRAF6/JUN/CUL1/HSP90AA1/HSP90AB1/RELA/ACTB/IKBKG/SRC/MAPK1	11
	GO:0006302	double-strand break repair	7.37e-08	1.3e-06	6.89e-07	RPA2/RPA1/RPA3/TP53/PARP1/XRCC6/FUS/MCM2/VCP/PRKDC/BRCA1	11
	GO:0044839	cell cycle G2/M phase transition	1.5e-07	2.46e-06	1.31e-06	APP/CDK2/TP53/CDK1/NPM1/CUL1/HSP90AA1/YWHAG/YWHAE/TUBB/BRCA1	11
	GO:0006260	DNA replication	2.02e-07	3.16e-06	1.68e-06	RPA2/CDK2/RPA1/RPA3/TP53/CDK1/PCNA/JUN/MCM2/EGFR/BRCA1	11
	GO:0051403	stress-activated MAPK cascade	3.1e-07	4.57e-06	2.43e-06	APP/TRAF6/MYC/AKT1/RPS27A/UBC/CUL1/IKBKG/COPS5/EGFR/MAPK1	11
	GO:0031098	stress-activated protein kinase signaling cascade	8.05e-07	1.11e-05	5.89e-06	APP/TRAF6/MYC/AKT1/RPS27A/UBC/CUL1/IKBKG/COPS5/EGFR/MAPK1	11
	GO:0045862	positive regulation of proteolysis	3.19e-06	3.64e-05	1.94e-05	APP/MYH9/MYC/FN1/AKT1/HDAC2/SMURF1/SRC/SMAD3/VCP/MDM2	11
	GO:0052547	regulation of peptidase activity	2.5e-05	0.000211031	0.000112347	APP/MYC/FN1/AKT1/HDAC1/ARRB2/YWHAE/SRC/SMAD3/VCP/MDM2	11
	GO:0042326	negative regulation of phosphorylation	3.44e-05	0.000276233	0.000147059	HNRNPU/MYC/AKT1/NPM1/JUN/ARRB2/TARDBP/HSPB1/YWHAG/RB1/PRKDC	11
	GO:0010975	regulation of neuron projection development	6.13e-05	0.000441169	0.000234866	FN1/AKT1/HDAC2/NTRK1/EZH2/OBSL1/HSPA5/EP300/CUL7/SMURF1/MDM2	11
	GO:1900034	regulation of cellular response to heat	1.06e-11	8.12e-10	4.32e-10	RPA2/RPA1/RPA3/HSP90AA1/HSP90AB1/HSPA8/YWHAE/EP300/MAPK1/CREBBP	10
	GO:1901989	positive regulation of cell cycle phase transition	2.09e-10	1.05e-08	5.58e-09	APP/AKT1/CDK1/NPM1/EZH2/CUL3/CUL4B/RB1/EGFR/MDM2	10
	GO:2000278	regulation of DNA biosynthetic process	2.52e-10	1.24e-08	6.58e-09	HNRNPU/MYC/TP53/HNRNPA1/ARRB2/HSP90AA1/HSP90AB1/SRC/CTNNB1/MAPK1	10
	GO:2000134	negative regulation of G1/S transition of mitotic cell cycle	1.07e-09	4.3e-08	2.29e-08	RPA2/CDK2/TP53/CDK1/PCNA/EZH2/EP300/RB1/PRKDC/MDM2	10
	GO:0043620	regulation of DNA-templated transcription in response to stress	1.25e-09	4.85e-08	2.58e-08	TP53/RPS27A/UBC/JUN/CUL2/HSPA5/EP300/RELA/VHL/CREBBP	10
	GO:1902807	negative regulation of cell cycle G1/S phase transition	1.7e-09	5.93e-08	3.16e-08	RPA2/CDK2/TP53/CDK1/PCNA/EZH2/EP300/RB1/PRKDC/MDM2	10
	GO:0030518	intracellular steroid hormone receptor signaling pathway	1.83e-09	6.25e-08	3.33e-08	PARP1/HDAC1/ARRB2/ESR1/AR/EP300/RB1/SRC/CTNNB1/BRCA1	10
	GO:0042770	signal transduction in response to DNA damage	1.97e-09	6.53e-08	3.47e-08	GRB2/CDK2/TP53/CDC5L/CDK1/PCNA/EP300/PRKDC/BRCA1/MDM2	10
	GO:0072655	establishment of protein localization to mitochondrion	2.63e-09	8.37e-08	4.46e-08	TP53/AKT1/HSP90AA1/HSPA4/YWHAZ/YWHAG/YWHAE/YWHAB/YWHAQ/HUWE1	10
	GO:0070585	protein localization to mitochondrion	3.48e-09	1.05e-07	5.57e-08	TP53/AKT1/HSP90AA1/HSPA4/YWHAZ/YWHAG/YWHAE/YWHAB/YWHAQ/HUWE1	10
	GO:0010212	response to ionizing radiation	5.22e-09	1.47e-07	7.83e-08	GRB2/MYC/TP53/PARP1/XRCC6/HSPA5/VCAM1/PRKDC/BRCA1/MDM2	10
	GO:0071236	cellular response to antibiotic	5.22e-09	1.47e-07	7.83e-08	TP53/HNRNPA1/CDK1/PCNA/HDAC2/EZH2/HSPA5/RELA/SRC/MDM2	10
	GO:0007093	mitotic cell cycle checkpoint	1.59e-08	3.7e-07	1.97e-07	RPA2/CDK2/TP53/CDK1/PCNA/EP300/RB1/PRKDC/BRCA1/MDM2	10
	GO:2001252	positive regulation of chromosome organization	2.63e-08	5.43e-07	2.89e-07	HNRNPU/TP53/HNRNPA1/EED/CUL3/RB1/CTNNB1/MAPK1/SNW1/BRCA1	10
	GO:0043401	steroid hormone mediated signaling pathway	4.48e-08	8.67e-07	4.62e-07	PARP1/HDAC1/ARRB2/ESR1/AR/EP300/RB1/SRC/CTNNB1/BRCA1	10
	GO:0043393	regulation of protein binding	2.1e-07	3.26e-06	1.74e-06	APP/AKT1/HDAC5/ARRB2/ITGA4/HSP90AB1/HSPA5/EP300/ACTB/SRC	10
	GO:0009755	hormone-mediated signaling pathway	4.38e-07	6.38e-06	3.4e-06	PARP1/HDAC1/ARRB2/ESR1/AR/EP300/RB1/SRC/CTNNB1/BRCA1	10
	GO:0033002	muscle cell proliferation	5.12e-07	7.22e-06	3.84e-06	TRAF6/AKT1/CDK1/XRCC6/JUN/CTNNB1/EGFR/MAPK1/PRKDC/MDM2	10
	GO:0051402	neuron apoptotic process	5.12e-07	7.22e-06	3.84e-06	APP/TP53/PARP1/NTRK1/JUN/ARRB2/HSP90AB1/HSPA5/RB1/CTNNB1	10
	GO:0097237	cellular response to toxic substance	6.92e-07	9.63e-06	5.13e-06	HNRNPA1/CDK1/PCNA/HDAC2/NTRK1/EZH2/RELA/ACTB/SRC/MDM2	10
	GO:0043406	positive regulation of MAP kinase activity	1.03e-06	1.36e-05	7.23e-06	TRAF6/CDK1/RPS27A/NTRK1/UBC/EZH2/IKBKG/SRC/EGFR/MAPK1	10
	GO:0031668	cellular response to extracellular stimulus	1.45e-06	1.79e-05	9.55e-06	TP53/HNRNPA1/JUN/ITGA4/HSPA5/HSPA8/VCAM1/MAPK1/SNW1/MDM2	10
	GO:0060485	mesenchyme development	2.02e-06	2.42e-05	1.29e-05	MYC/FN1/HDAC2/EZH2/CUL7/SMAD2/CTNNB1/SMAD3/MAPK1/MDM2	10
	GO:0042063	gliogenesis	2.94e-06	3.39e-05	1.8e-05	APP/AKT1/CDK1/HDAC2/HDAC1/EZH2/RELA/CTNNB1/EGFR/MAPK1	10
	GO:0000209	protein polyubiquitination	5.31e-06	5.73e-05	3.05e-05	TRAF6/RPS27A/UBC/CUL3/CUL1/SMURF1/HUWE1/CTNNB1/BRCA1/FBXO6	10
	GO:0071375	cellular response to peptide hormone stimulus	7.21e-06	7.32e-05	3.9e-05	GRB2/AKT1/CDC5L/PARP1/HDAC5/YWHAG/RELA/SRC/PRKDC/MDM2	10
	GO:0071103	DNA conformation change	8.48e-06	8.37e-05	4.45e-05	RPA1/TP53/CDK1/PARP1/RPS27A/XRCC6/UBC/NPM1/CUL4B/MCM2	10
	GO:0032147	activation of protein kinase activity	9.94e-06	9.6e-05	5.11e-05	TRAF6/AKT1/CDK1/RPS27A/NTRK1/UBC/IKBKG/SRC/EGFR/MAPK1	10
	GO:0007596	blood coagulation	1.07e-05	0.000102831	5.47e-05	MYH9/FLNA/HDAC2/HDAC1/ARRB2/HSPB1/YWHAZ/ACTB/SRC/MAPK1	10
	GO:0043405	regulation of MAP kinase activity	1.1e-05	0.000105207	5.6e-05	TRAF6/CDK1/RPS27A/NTRK1/UBC/EZH2/IKBKG/SRC/EGFR/MAPK1	10
	GO:0007599	hemostasis	1.22e-05	0.000115179	6.13e-05	MYH9/FLNA/HDAC2/HDAC1/ARRB2/HSPB1/YWHAZ/ACTB/SRC/MAPK1	10
	GO:0050817	coagulation	1.25e-05	0.000117793	6.27e-05	MYH9/FLNA/HDAC2/HDAC1/ARRB2/HSPB1/YWHAZ/ACTB/SRC/MAPK1	10
	GO:0003002	regionalization	1.57e-05	0.000142834	7.6e-05	TP53/RNF2/EED/AR/EP300/SMAD2/CTNNB1/SMAD3/PRKDC/BMI1	10
	GO:0050678	regulation of epithelial cell proliferation	2.96e-05	0.000245623	0.000130763	MYC/AKT1/JUN/ITGA4/AR/RB1/CTNNB1/SMAD3/EGFR/PRKDC	10
	GO:0042692	muscle cell differentiation	3.45e-05	0.000276938	0.000147434	HNRNPU/MYH9/AKT1/CDK1/HDAC5/EZH2/ARRB2/OBSL1/RB1/CTNNB1	10
	GO:0010639	negative regulation of organelle organization	4.29e-05	0.000327493	0.000174348	HNRNPU/TP53/HNRNPA1/AKT1/PARP1/NPM1/ARRB2/MCM2/SRC/BRCA1	10
	GO:0045785	positive regulation of cell adhesion	5.07e-05	0.000375925	0.000200133	GRB2/TRAF6/FN1/AKT1/FLNA/ITGA4/RELA/SRC/SMAD3/VCAM1	10
	GO:0051222	positive regulation of protein transport	6.88e-05	0.000489625	0.000260663	TP53/FLNA/TARDBP/YWHAE/SRC/HUWE1/SMAD3/EGFR/MAPK1/MDM2	10
	GO:0032386	regulation of intracellular transport	7.6e-05	0.000529842	0.000282074	TP53/FLNA/TARDBP/YWHAE/XPO1/SRC/HUWE1/SMAD3/MAPK1/MDM2	10
	GO:0052548	regulation of endopeptidase activity	7.9e-05	0.000548568	0.000292043	APP/MYC/AKT1/HDAC1/ARRB2/YWHAE/SRC/SMAD3/VCP/MDM2	10
	GO:0001933	negative regulation of protein phosphorylation	8.54e-05	0.000586407	0.000312187	MYC/AKT1/NPM1/JUN/ARRB2/TARDBP/HSPB1/YWHAG/RB1/PRKDC	10
	GO:0043434	response to peptide hormone	9.75e-05	0.000645274	0.000343527	GRB2/AKT1/CDC5L/PARP1/HDAC5/YWHAG/RELA/SRC/PRKDC/MDM2	10
	GO:0010256	endomembrane system organization	0.000101284	0.000661846	0.000352349	MYH9/UBL4A/AKT1/CDK1/TARDBP/AR/OBSL1/YWHAZ/CUL7/MAPK1	10
	GO:0007389	pattern specification process	0.000117487	0.000747963	0.000398195	TP53/RNF2/EED/AR/EP300/SMAD2/CTNNB1/SMAD3/PRKDC/BMI1	10
	GO:0062012	regulation of small molecule metabolic process	0.000148491	0.000914559	0.000486887	APP/TP53/AKT1/CDK1/PARP1/EP300/SRC/VCP/CLTC/BRCA1	10
	GO:0042110	T cell activation	0.00016213	0.000977952	0.000520635	GRB2/MYH9/TRAF6/TP53/AKT1/SRC/CTNNB1/SMAD3/VCAM1/PRKDC	10
	GO:0007409	axonogenesis	0.000173789	0.00103682	0.000551976	APP/GRB2/FN1/NTRK1/ITGA4/HSP90AA1/HSP90AB1/ACTB/SRC/MAPK1	10
	GO:0043312	neutrophil degranulation	0.000231556	0.00131297	0.000698988	CAND1/EEF1A1/XRCC6/HSP90AA1/HSP90AB1/HSPA8/TUBB/HUWE1/VCP/MAPK1	10
	GO:0002283	neutrophil activation involved in immune response	0.000243262	0.00137449	0.000731743	CAND1/EEF1A1/XRCC6/HSP90AA1/HSP90AB1/HSPA8/TUBB/HUWE1/VCP/MAPK1	10
	GO:0042119	neutrophil activation	0.000285939	0.00157954	0.000840906	CAND1/EEF1A1/XRCC6/HSP90AA1/HSP90AB1/HSPA8/TUBB/HUWE1/VCP/MAPK1	10
	GO:0002446	neutrophil mediated immunity	0.000290532	0.00160216	0.000852948	CAND1/EEF1A1/XRCC6/HSP90AA1/HSP90AB1/HSPA8/TUBB/HUWE1/VCP/MAPK1	10
	GO:0006283	transcription-coupled nucleotide-excision repair	1.53e-10	8.2e-09	4.37e-09	RPA2/RPA1/RPA3/PCNA/RPS27A/UBC/CUL4B/EP300/COPS5	9
	GO:0072401	signal transduction involved in DNA integrity checkpoint	1.53e-10	8.2e-09	4.37e-09	CDK2/TP53/CDC5L/CDK1/PCNA/EP300/PRKDC/BRCA1/MDM2	9
	GO:0072422	signal transduction involved in DNA damage checkpoint	1.53e-10	8.2e-09	4.37e-09	CDK2/TP53/CDC5L/CDK1/PCNA/EP300/PRKDC/BRCA1/MDM2	9
	GO:0072395	signal transduction involved in cell cycle checkpoint	1.73e-10	9e-09	4.79e-09	CDK2/TP53/CDC5L/CDK1/PCNA/EP300/PRKDC/BRCA1/MDM2	9
	GO:0010833	telomere maintenance via telomere lengthening	4.44e-10	1.96e-08	1.04e-08	HNRNPU/RPA1/HNRNPA1/PARP1/HSP90AA1/HSP90AB1/SRC/CTNNB1/MAPK1	9
	GO:0034644	cellular response to UV	4.44e-10	1.96e-08	1.04e-08	MYC/TP53/PARP1/PCNA/NPM1/CUL4B/EP300/CREBBP/MDM2	9
	GO:0048145	regulation of fibroblast proliferation	4.96e-10	2.16e-08	1.15e-08	MYC/FN1/TP53/JUN/ESR1/CTNNB1/EGFR/PRKDC/BMI1	9
	GO:0048144	fibroblast proliferation	5.53e-10	2.37e-08	1.26e-08	MYC/FN1/TP53/JUN/ESR1/CTNNB1/EGFR/PRKDC/BMI1	9
	GO:0010822	positive regulation of mitochondrion organization	1.08e-08	2.68e-07	1.43e-07	CDC37/TP53/YWHAZ/YWHAG/YWHAE/YWHAB/SMURF1/YWHAQ/HUWE1	9
	GO:0043618	regulation of transcription from RNA polymerase II promoter in response to stress	1.45e-08	3.46e-07	1.84e-07	TP53/RPS27A/UBC/JUN/CUL2/HSPA5/EP300/VHL/CREBBP	9
	GO:0008637	apoptotic mitochondrial changes	1.8e-08	4.03e-07	2.14e-07	TP53/AKT1/JUN/ARRB2/YWHAZ/YWHAG/YWHAE/YWHAB/YWHAQ	9
	GO:0071482	cellular response to light stimulus	2.54e-08	5.33e-07	2.84e-07	MYC/TP53/PARP1/PCNA/NPM1/CUL4B/EP300/CREBBP/MDM2	9
	GO:1903322	positive regulation of protein modification by small protein conjugation or removal	3.77e-08	7.49e-07	3.99e-07	TRAF6/ARRB2/CUL3/HSPA5/HUWE1/VCP/BRCA1/UBE2I/BMI1	9
	GO:0038127	ERBB signaling pathway	5.85e-08	1.07e-06	5.69e-07	APP/GRB2/CDC37/AKT1/CUL5/HSP90AA1/SRC/EGFR/MAPK1	9
	GO:0051092	positive regulation of NF-kappaB transcription factor activity	8.86e-08	1.53e-06	8.15e-07	APP/TRAF6/RPS27A/NTRK1/UBC/NPM1/AR/RELA/IKBKG	9
	GO:0045931	positive regulation of mitotic cell cycle	1.91e-07	3.02e-06	1.61e-06	APP/HNRNPU/AKT1/CDK1/CUL3/CUL4B/RB1/EGFR/MDM2	9
	GO:0006338	chromatin remodeling	4.87e-07	6.96e-06	3.7e-06	MYC/HDAC2/HDAC1/HDAC5/NPM1/ESR1/ACTB/RB1/CTNNB1	9
	GO:0010389	regulation of G2/M transition of mitotic cell cycle	9.06e-07	1.22e-05	6.52e-06	APP/CDK2/CDK1/CUL1/HSP90AA1/YWHAG/YWHAE/TUBB/BRCA1	9
	GO:0017038	protein import	1.03e-06	1.36e-05	7.23e-06	TP53/AKT1/FLNA/TARDBP/HSP90AA1/HSPA8/HSPA4/SMAD3/MAPK1	9
	GO:0002573	myeloid leukocyte differentiation	1.26e-06	1.59e-05	8.46e-06	APP/MYH9/TRAF6/MYC/PARP1/JUN/RB1/SRC/CTNNB1	9
	GO:0071241	cellular response to inorganic substance	2.11e-06	2.52e-05	1.34e-05	APP/CDK2/AKT1/PARP1/FUS/JUN/HSPA5/EGFR/MAPK1	9
	GO:0010001	glial cell differentiation	2.19e-06	2.6e-05	1.38e-05	APP/AKT1/CDK1/HDAC2/HDAC1/RELA/CTNNB1/EGFR/MAPK1	9
	GO:0033157	regulation of intracellular protein transport	2.84e-06	3.32e-05	1.77e-05	TP53/FLNA/TARDBP/YWHAE/XPO1/HUWE1/SMAD3/MAPK1/MDM2	9
	GO:0000086	G2/M transition of mitotic cell cycle	6.07e-06	6.37e-05	3.39e-05	APP/CDK2/CDK1/CUL1/HSP90AA1/YWHAG/YWHAE/TUBB/BRCA1	9
	GO:0006352	DNA-templated transcription, initiation	6.48e-06	6.76e-05	3.6e-05	CAND1/TP53/CDK1/JUN/ESR1/AR/CTNNB1/SNW1/CREBBP	9
	GO:0006839	mitochondrial transport	8.1e-06	8.08e-05	4.3e-05	TP53/HSP90AA1/HSPA4/YWHAZ/YWHAG/YWHAE/YWHAB/YWHAQ/HUWE1	9
	GO:0034976	response to endoplasmic reticulum stress	1.91e-05	0.000167342	8.91e-05	TP53/JUN/TARDBP/HSPA5/EP300/CUL7/COPS5/VCP/FBXO6	9
	GO:0006310	DNA recombination	2.31e-05	0.000196201	0.000104452	RPA2/RPA1/RPA3/PARP1/XRCC6/FUS/MCM2/PRKDC/BRCA1	9
	GO:0009410	response to xenobiotic stimulus	2.31e-05	0.000196201	0.000104452	PCNA/HDAC2/HDAC5/HSP90AB1/HSPA5/RELA/RB1/EGFR/MDM2	9
	GO:0051146	striated muscle cell differentiation	2.37e-05	0.000201018	0.000107017	HNRNPU/MYH9/AKT1/CDK1/HDAC5/EZH2/ARRB2/OBSL1/RB1	9
	GO:0090305	nucleic acid phosphodiester bond hydrolysis	3e-05	0.000247036	0.000131515	RPA2/RPA1/RPA3/PARP1/PCNA/RPS27A/UBC/CUL4B/PAN2	9
	GO:0009895	negative regulation of catabolic process	3.5e-05	0.000280173	0.000149156	HNRNPU/TP53/AKT1/FLNA/TARDBP/HSP90AB1/RELA/SMAD3/EGFR	9
	GO:1901214	regulation of neuron death	3.97e-05	0.000308376	0.000164171	TP53/AKT1/PARP1/NTRK1/JUN/ARRB2/HSP90AB1/IKBKG/CTNNB1	9
	GO:0070371	ERK1 and ERK2 cascade	4.38e-05	0.000331805	0.000176644	APP/MYC/FN1/NTRK1/JUN/ARRB2/SRC/EGFR/MAPK1	9
	GO:0032496	response to lipopolysaccharide	5.98e-05	0.000434766	0.000231457	TRAF6/AKT1/HDAC2/HDAC5/JUN/RELA/SRC/VCAM1/MAPK1	9
	GO:0002237	response to molecule of bacterial origin	8.04e-05	0.000555643	0.000295809	TRAF6/AKT1/HDAC2/HDAC5/JUN/RELA/SRC/VCAM1/MAPK1	9
	GO:0030111	regulation of Wnt signaling pathway	0.000123535	0.000780285	0.000415403	APP/HDAC1/CUL3/ESR1/SRC/CTNNB1/SMAD3/VCP/EGFR	9
	GO:0031346	positive regulation of cell projection organization	0.000184658	0.00109332	0.000582056	FN1/NTRK1/EZH2/OBSL1/HSPA5/EP300/CUL7/SMURF1/SRC	9
	GO:0014706	striated muscle tissue development	0.00021127	0.00121509	0.000646879	HNRNPU/CDK1/ARRB2/OBSL1/EP300/RB1/CTNNB1/SMAD3/MAPK1	9
	GO:0001503	ossification	0.000245522	0.00138241	0.000735955	HNRNPU/TRAF6/AKT1/SMURF1/CTNNB1/SMAD3/EGFR/CLTC/MAPK1	9
	GO:0060537	muscle tissue development	0.000294713	0.00161899	0.000861905	HNRNPU/CDK1/ARRB2/OBSL1/EP300/RB1/CTNNB1/SMAD3/MAPK1	9
	GO:0009896	positive regulation of catabolic process	0.000383628	0.00200221	0.00106592	APP/CDC37/AKT1/CUL4B/HSP90AA1/IKBKG/SMURF1/VCP/MDM2	9
	GO:0048568	embryonic organ development	0.000417783	0.00214564	0.00114228	GRB2/RPL10/TP53/AKT1/SMAD2/CTNNB1/SMAD3/EGFR/MAPK1	9
	GO:0042391	regulation of membrane potential	0.000462043	0.0023241	0.00123729	APP/AKT1/FLNA/PARP1/JUN/ARRB2/YWHAE/SRC/VCP	9
	GO:0051346	negative regulation of hydrolase activity	0.000768374	0.00358537	0.00190876	APP/TP53/AKT1/ARRB2/MCM2/YWHAE/SRC/CCDC8/MDM2	9
	GO:0008380	RNA splicing	0.000804041	0.00371941	0.00198012	HNRNPU/HNRNPK/HNRNPA1/CDC5L/U2AF2/FUS/TARDBP/HSPA8/SNW1	9
	GO:0006296	nucleotide-excision repair, DNA incision, 5'-to lesion	1.47e-11	1.05e-09	5.58e-10	RPA2/RPA1/RPA3/PARP1/PCNA/RPS27A/UBC/CUL4B	8
	GO:0033683	nucleotide-excision repair, DNA incision	2.32e-11	1.55e-09	8.27e-10	RPA2/RPA1/RPA3/PARP1/PCNA/RPS27A/UBC/CUL4B	8
	GO:0042769	DNA damage response, detection of DNA damage	2.32e-11	1.55e-09	8.27e-10	RPA2/RPA1/RPA3/PARP1/PCNA/RPS27A/UBC/CUL4B	8
	GO:0051205	protein insertion into membrane	1.63e-10	8.58e-09	4.57e-09	TP53/UBL4A/YWHAZ/YWHAG/YWHAE/YWHAB/YWHAQ/EGFR	8
	GO:0006301	postreplication repair	2.68e-10	1.27e-08	6.75e-09	RPA2/RPA1/RPA3/PCNA/RPS27A/UBC/VCP/BRCA1	8
	GO:0031571	mitotic G1 DNA damage checkpoint	1.32e-09	4.98e-08	2.65e-08	RPA2/CDK2/TP53/CDK1/PCNA/EP300/PRKDC/MDM2	8
	GO:0044819	mitotic G1/S transition checkpoint	1.32e-09	4.98e-08	2.65e-08	RPA2/CDK2/TP53/CDK1/PCNA/EP300/PRKDC/MDM2	8
	GO:0044783	G1 DNA damage checkpoint	1.5e-09	5.54e-08	2.95e-08	RPA2/CDK2/TP53/CDK1/PCNA/EP300/PRKDC/MDM2	8
	GO:2000573	positive regulation of DNA biosynthetic process	2.18e-09	7.08e-08	3.77e-08	MYC/HNRNPA1/ARRB2/HSP90AA1/HSP90AB1/SRC/CTNNB1/MAPK1	8
	GO:0007004	telomere maintenance via telomerase	3.11e-09	9.63e-08	5.12e-08	HNRNPU/RPA1/HNRNPA1/HSP90AA1/HSP90AB1/SRC/CTNNB1/MAPK1	8
	GO:1900182	positive regulation of protein localization to nucleus	4.89e-09	1.42e-07	7.53e-08	AKT1/FLNA/CDK1/PARP1/TARDBP/SRC/SMAD3/MAPK1	8
	GO:0006278	RNA-dependent DNA biosynthetic process	6.73e-09	1.85e-07	9.85e-08	HNRNPU/RPA1/HNRNPA1/HSP90AA1/HSP90AB1/SRC/CTNNB1/MAPK1	8
	GO:0033143	regulation of intracellular steroid hormone receptor signaling pathway	7.47e-09	1.99e-07	1.06e-07	PARP1/HDAC1/ARRB2/ESR1/AR/EP300/SRC/BRCA1	8
	GO:1901992	positive regulation of mitotic cell cycle phase transition	2.56e-08	5.33e-07	2.84e-07	APP/AKT1/CDK1/CUL3/CUL4B/RB1/EGFR/MDM2	8
	GO:0044773	mitotic DNA damage checkpoint	4.24e-08	8.27e-07	4.4e-07	RPA2/CDK2/TP53/CDK1/PCNA/EP300/PRKDC/MDM2	8
	GO:0046822	regulation of nucleocytoplasmic transport	7.34e-08	1.3e-06	6.89e-07	TP53/FLNA/TARDBP/YWHAE/XPO1/SMAD3/MAPK1/MDM2	8
	GO:0044774	mitotic DNA integrity checkpoint	8.52e-08	1.48e-06	7.88e-07	RPA2/CDK2/TP53/CDK1/PCNA/EP300/PRKDC/MDM2	8
	GO:0071156	regulation of cell cycle arrest	9.86e-08	1.68e-06	8.93e-07	CDK2/TP53/CDK1/PCNA/HSP90AB1/EP300/BRCA1/MDM2	8
	GO:1900180	regulation of protein localization to nucleus	1.72e-07	2.76e-06	1.47e-06	AKT1/FLNA/CDK1/PARP1/TARDBP/SRC/SMAD3/MAPK1	8
	GO:0032392	DNA geometric change	2.1e-07	3.26e-06	1.74e-06	RPA1/TP53/PARP1/RPS27A/XRCC6/UBC/CUL4B/MCM2	8
	GO:1905477	positive regulation of protein localization to membrane	2.54e-07	3.85e-06	2.05e-06	TP53/AKT1/YWHAZ/YWHAG/YWHAE/YWHAB/YWHAQ/EGFR	8
	GO:0007006	mitochondrial membrane organization	5.22e-07	7.33e-06	3.9e-06	TP53/HSP90AA1/HSPA4/YWHAZ/YWHAG/YWHAE/YWHAB/YWHAQ	8
	GO:0042542	response to hydrogen peroxide	1e-06	1.34e-05	7.12e-06	CDK1/PCNA/HDAC2/EZH2/JUN/RELA/SRC/MDM2	8
	GO:0030168	platelet activation	1.43e-06	1.77e-05	9.44e-06	MYH9/FLNA/ARRB2/HSPB1/YWHAZ/ACTB/SRC/MAPK1	8
	GO:0090316	positive regulation of intracellular protein transport	1.43e-06	1.77e-05	9.44e-06	TP53/FLNA/TARDBP/YWHAE/HUWE1/SMAD3/MAPK1/MDM2	8
	GO:2001242	regulation of intrinsic apoptotic signaling pathway	2.52e-06	2.97e-05	1.58e-05	TP53/HNRNPK/AKT1/PARP1/HDAC1/HSPB1/SRC/MDM2	8
	GO:0048660	regulation of smooth muscle cell proliferation	3.01e-06	3.45e-05	1.84e-05	TRAF6/AKT1/XRCC6/JUN/CTNNB1/EGFR/PRKDC/MDM2	8
	GO:0048659	smooth muscle cell proliferation	3.28e-06	3.7e-05	1.97e-05	TRAF6/AKT1/XRCC6/JUN/CTNNB1/EGFR/PRKDC/MDM2	8
	GO:0050821	protein stabilization	4.42e-06	4.88e-05	2.6e-05	CDC37/TP53/FLNA/HSP90AA1/HSP90AB1/EP300/VHL/SMAD3	8
	GO:0038061	NIK/NF-kappaB signaling	5.42e-06	5.81e-05	3.09e-05	APP/TRAF6/AKT1/CUL1/EP300/RELA/EGFR/IKBKE	8
	GO:0043123	positive regulation of I-kappaB kinase/NF-kappaB signaling	5.42e-06	5.81e-05	3.09e-05	TRAF6/AKT1/FLNA/RELA/IKBKG/CTNNB1/IKBKE/UBE2I	8
	GO:0007369	gastrulation	5.88e-06	6.22e-05	3.31e-05	FN1/TP53/RNF2/CUL3/ITGA4/SMAD2/CTNNB1/SMAD3	8
	GO:0071248	cellular response to metal ion	7.15e-06	7.27e-05	3.87e-05	APP/AKT1/PARP1/FUS/JUN/HSPA5/EGFR/MAPK1	8
	GO:1901654	response to ketone	8.02e-06	8.03e-05	4.28e-05	AKT1/CDC5L/PARP1/PCNA/AR/RELA/SRC/EGFR	8
	GO:0051168	nuclear export	8.33e-06	8.26e-05	4.4e-05	TP53/HNRNPA1/U2AF2/NPM1/YWHAE/XPO1/SMURF1/MDM2	8
	GO:2000377	regulation of reactive oxygen species metabolic process	8.65e-06	8.49e-05	4.52e-05	GRB2/TP53/AKT1/HSP90AA1/HSP90AB1/SMAD3/EGFR/BRCA1	8
	GO:0002221	pattern recognition receptor signaling pathway	9.32e-06	9.08e-05	4.83e-05	TRAF6/RPS27A/UBC/ARRB2/ESR1/RELA/IKBKG/IKBKE	8
	GO:0070555	response to interleukin-1	1.34e-05	0.000124483	6.63e-05	APP/TRAF6/RPS27A/UBC/CUL1/RELA/IKBKG/SRC	8
	GO:0007254	JNK cascade	1.7e-05	0.000153074	8.15e-05	APP/TRAF6/AKT1/RPS27A/UBC/IKBKG/COPS5/EGFR	8
	GO:0032388	positive regulation of intracellular transport	1.76e-05	0.000157308	8.37e-05	TP53/FLNA/TARDBP/YWHAE/HUWE1/SMAD3/MAPK1/MDM2	8
	GO:0043281	regulation of cysteine-type endopeptidase activity involved in apoptotic process	1.76e-05	0.000157308	8.37e-05	MYC/AKT1/ARRB2/YWHAE/SRC/SMAD3/VCP/MDM2	8
	GO:0032869	cellular response to insulin stimulus	1.82e-05	0.000160932	8.57e-05	GRB2/AKT1/PARP1/HDAC5/YWHAG/RELA/SRC/PRKDC	8
	GO:0048762	mesenchymal cell differentiation	2.01e-05	0.000174844	9.31e-05	FN1/HDAC2/EZH2/CUL7/SMAD2/CTNNB1/SMAD3/MAPK1	8
	GO:0097305	response to alcohol	3.13e-05	0.000254524	0.000135502	AKT1/CDK1/PARP1/HDAC2/SMAD2/CTNNB1/VCAM1/BRCA1	8
	GO:0060560	developmental growth involved in morphogenesis	3.32e-05	0.000268454	0.000142918	APP/FN1/ITGA4/ESR1/HSP90AA1/HSP90AB1/SMURF1/CTNNB1	8
	GO:0071216	cellular response to biotic stimulus	3.43e-05	0.000275992	0.000146931	TRAF6/TP53/AKT1/HDAC5/HSPA5/RELA/SRC/MAPK1	8
	GO:0031669	cellular response to nutrient levels	3.53e-05	0.00028159	0.000149911	TP53/HNRNPA1/JUN/HSPA5/HSPA8/MAPK1/SNW1/MDM2	8
	GO:2000116	regulation of cysteine-type endopeptidase activity	3.75e-05	0.000295965	0.000157564	MYC/AKT1/ARRB2/YWHAE/SRC/SMAD3/VCP/MDM2	8
	GO:0051896	regulation of protein kinase B signaling	4.34e-05	0.000330536	0.000175968	GRB2/AKT1/ARRB2/ESR1/HSP90AA1/HSP90AB1/SRC/EGFR	8
	GO:0045637	regulation of myeloid cell differentiation	5.3e-05	0.00038703	0.000206044	TRAF6/MYC/HDAC1/JUN/EP300/RB1/CTNNB1/CREBBP	8
	GO:0140014	mitotic nuclear division	7.55e-05	0.00052739	0.000280768	HNRNPU/FLNA/CUL3/OBSL1/CUL7/RB1/CCDC8/SIRT7	8
	GO:0043491	protein kinase B signaling	8.6e-05	0.00058949	0.000313829	GRB2/AKT1/ARRB2/ESR1/HSP90AA1/HSP90AB1/SRC/EGFR	8
	GO:0007548	sex differentiation	8.82e-05	0.000603607	0.000321344	FLNA/NTRK1/ARRB2/ESR1/AR/HSPA5/SRC/CTNNB1	8
	GO:0032868	response to insulin	9.29e-05	0.00061825	0.00032914	GRB2/AKT1/PARP1/HDAC5/YWHAG/RELA/SRC/PRKDC	8
	GO:0010976	positive regulation of neuron projection development	0.000116346	0.000742169	0.000395111	FN1/NTRK1/EZH2/OBSL1/HSPA5/EP300/CUL7/SMURF1	8
	GO:0072593	reactive oxygen species metabolic process	0.00012518	0.000789127	0.00042011	GRB2/TP53/AKT1/HSP90AA1/HSP90AB1/SMAD3/EGFR/BRCA1	8
	GO:0051348	negative regulation of transferase activity	0.000128245	0.000802158	0.000427047	HNRNPU/TP53/AKT1/NPM1/HSPB1/YWHAG/RB1/SRC	8
	GO:0043414	macromolecule methylation	0.000222696	0.00127623	0.000679433	MYC/SUZ12/PARP1/EED/EZH2/CTNNB1/SNW1/BRCA1	8
	GO:0010506	regulation of autophagy	0.000325976	0.00176137	0.000937705	CDC37/TP53/AKT1/EEF1A1/HSPB1/EP300/IKBKG/SMURF1	8
	GO:0019058	viral life cycle	0.0003327	0.00179468	0.00095544	STAU1/CDK1/RPS27A/UBC/HSP90AB1/XPO1/VCP/EGFR	8
	GO:0001101	response to acid chemical	0.000447924	0.00226427	0.00120543	AKT1/PCNA/HDAC2/NTRK1/RELA/SRC/EGFR/SNW1	8
	GO:0048638	regulation of developmental growth	0.000483587	0.00240299	0.00127929	APP/FN1/AKT1/CDK1/AR/SMURF1/MAPK1/PRKDC	8
	GO:0030098	lymphocyte differentiation	0.00054138	0.00266545	0.00141901	TP53/NTRK1/HDAC5/ITGA4/EP300/CTNNB1/VCAM1/PRKDC	8
	GO:0031331	positive regulation of cellular catabolic process	0.000627029	0.00303599	0.00161628	APP/CDC37/AKT1/HSP90AA1/IKBKG/SMURF1/VCP/MDM2	8
	GO:0045861	negative regulation of proteolysis	0.000650069	0.00314281	0.00167315	APP/TP53/AKT1/ARRB2/HSP90AB1/YWHAE/SRC/MDM2	8
	GO:0032259	methylation	0.000685908	0.00328643	0.00174961	MYC/SUZ12/PARP1/EED/EZH2/CTNNB1/SNW1/BRCA1	8
	GO:0045666	positive regulation of neuron differentiation	0.000749177	0.00350598	0.00186649	FN1/NTRK1/EZH2/OBSL1/HSPA5/EP300/CUL7/SMURF1	8
	GO:0000377	RNA splicing, via transesterification reactions with bulged adenosine as nucleophile	0.000860134	0.00393361	0.00209415	HNRNPU/HNRNPK/HNRNPA1/CDC5L/U2AF2/FUS/HSPA8/SNW1	8
	GO:0000398	mRNA splicing, via spliceosome	0.000860134	0.00393361	0.00209415	HNRNPU/HNRNPK/HNRNPA1/CDC5L/U2AF2/FUS/HSPA8/SNW1	8
	GO:0030900	forebrain development	0.000889842	0.00403504	0.00214814	APP/FLNA/HDAC1/EZH2/YWHAE/SRC/CTNNB1/EGFR	8
	GO:0000375	RNA splicing, via transesterification reactions	0.000905002	0.004098	0.00218167	HNRNPU/HNRNPK/HNRNPA1/CDC5L/U2AF2/FUS/HSPA8/SNW1	8
	GO:0043900	regulation of multi-organism process	0.00131512	0.00545561	0.00290442	STAU1/TRAF6/HDAC2/HDAC1/JUN/TARDBP/EP300/SNW1	8
	GO:0000280	nuclear division	0.00135682	0.0055997	0.00298113	HNRNPU/FLNA/CUL3/OBSL1/CUL7/RB1/CCDC8/SIRT7	8
	GO:0050808	synapse organization	0.00137806	0.00568008	0.00302392	APP/STAU1/NTRK1/YWHAZ/ACTB/TUBB/CTNNB1/VCP	8
	GO:0007517	muscle organ development	0.00142134	0.00582115	0.00309902	CDK1/ARRB2/OBSL1/EP300/RB1/CTNNB1/SMAD3/MAPK1	8
	GO:0050804	modulation of chemical synaptic transmission	0.00208899	0.00783676	0.00417208	APP/STAU1/NTRK1/ARRB2/YWHAG/SRC/EGFR/MAPK1	8
	GO:0099177	regulation of trans-synaptic signaling	0.00211889	0.00793967	0.00422686	APP/STAU1/NTRK1/ARRB2/YWHAG/SRC/EGFR/MAPK1	8
	GO:0048285	organelle fission	0.00250473	0.0091197	0.00485508	HNRNPU/FLNA/CUL3/OBSL1/CUL7/RB1/CCDC8/SIRT7	8
	GO:0001667	ameboidal-type cell migration	0.00294373	0.0104116	0.00554283	MYH9/FN1/AKT1/HDAC5/JUN/ITGA4/HSPB1/SRC	8
	GO:1903706	regulation of hemopoiesis	0.00352959	0.0119198	0.00634576	TRAF6/MYC/HDAC1/JUN/EP300/RB1/CTNNB1/CREBBP	8
	GO:0050900	leukocyte migration	0.00474077	0.0150608	0.00801798	APP/GRB2/MYH9/FN1/AKT1/ITGA4/SRC/VCAM1	8
	GO:0070987	error-free translesion synthesis	6.47e-12	5.48e-10	2.92e-10	RPA2/RPA1/RPA3/PCNA/RPS27A/UBC/VCP	7
	GO:0006294	nucleotide-excision repair, preincision complex assembly	1.25e-10	7.2e-09	3.83e-09	RPA2/RPA1/RPA3/PARP1/RPS27A/UBC/CUL4B	7
	GO:0019985	translesion synthesis	1.72e-09	5.93e-08	3.16e-08	RPA2/RPA1/RPA3/PCNA/RPS27A/UBC/VCP	7
	GO:0051972	regulation of telomerase activity	5.46e-09	1.53e-07	8.12e-08	MYC/TP53/HSP90AA1/HSP90AB1/SRC/CTNNB1/MAPK1	7
	GO:0000731	DNA synthesis involved in DNA repair	8.47e-09	2.18e-07	1.16e-07	RPA2/RPA1/RPA3/PCNA/RPS27A/UBC/VCP	7
	GO:0048146	positive regulation of fibroblast proliferation	8.47e-09	2.18e-07	1.16e-07	MYC/FN1/JUN/ESR1/EGFR/PRKDC/BMI1	7
	GO:0010332	response to gamma radiation	1.66e-08	3.79e-07	2.02e-07	MYC/TP53/PARP1/XRCC6/HSPA5/PRKDC/MDM2	7
	GO:0072431	signal transduction involved in mitotic G1 DNA damage checkpoint	1.89e-08	4.12e-07	2.19e-07	CDK2/TP53/CDK1/PCNA/EP300/PRKDC/MDM2	7
	GO:1902400	intracellular signal transduction involved in G1 DNA damage checkpoint	1.89e-08	4.12e-07	2.19e-07	CDK2/TP53/CDK1/PCNA/EP300/PRKDC/MDM2	7
	GO:1903749	positive regulation of establishment of protein localization to mitochondrion	2.13e-08	4.61e-07	2.45e-07	TP53/YWHAZ/YWHAG/YWHAE/YWHAB/YWHAQ/HUWE1	7
	GO:0072413	signal transduction involved in mitotic cell cycle checkpoint	2.41e-08	5.1e-07	2.72e-07	CDK2/TP53/CDK1/PCNA/EP300/PRKDC/MDM2	7
	GO:1902402	signal transduction involved in mitotic DNA damage checkpoint	2.41e-08	5.1e-07	2.72e-07	CDK2/TP53/CDK1/PCNA/EP300/PRKDC/MDM2	7
	GO:1902403	signal transduction involved in mitotic DNA integrity checkpoint	2.41e-08	5.1e-07	2.72e-07	CDK2/TP53/CDK1/PCNA/EP300/PRKDC/MDM2	7
	GO:0030521	androgen receptor signaling pathway	3.06e-08	6.22e-07	3.31e-07	HDAC1/ARRB2/AR/EP300/RB1/CTNNB1/BRCA1	7
	GO:0046824	positive regulation of nucleocytoplasmic transport	3.43e-08	6.85e-07	3.65e-07	TP53/FLNA/TARDBP/YWHAE/SMAD3/MAPK1/MDM2	7
	GO:1903747	regulation of establishment of protein localization to mitochondrion	9.85e-08	1.68e-06	8.93e-07	TP53/YWHAZ/YWHAG/YWHAE/YWHAB/YWHAQ/HUWE1	7
	GO:0061418	regulation of transcription from RNA polymerase II promoter in response to hypoxia	1.57e-07	2.56e-06	1.36e-06	TP53/RPS27A/UBC/CUL2/EP300/VHL/CREBBP	7
	GO:0030512	negative regulation of transforming growth factor beta receptor signaling pathway	2.24e-07	3.43e-06	1.82e-06	TP53/RPS27A/UBC/HSPA5/SMURF1/SMAD2/SMAD3	7
	GO:0032204	regulation of telomere maintenance	2.24e-07	3.43e-06	1.82e-06	HNRNPU/MYC/HNRNPA1/PARP1/SRC/CTNNB1/MAPK1	7
	GO:0071158	positive regulation of cell cycle arrest	2.44e-07	3.71e-06	1.98e-06	CDK2/TP53/CDK1/PCNA/EP300/BRCA1/MDM2	7
	GO:1903845	negative regulation of cellular response to transforming growth factor beta stimulus	2.65e-07	3.94e-06	2.1e-06	TP53/RPS27A/UBC/HSPA5/SMURF1/SMAD2/SMAD3	7
	GO:2001022	positive regulation of response to DNA damage stimulus	7.72e-07	1.07e-05	5.67e-06	MYC/PARP1/PCNA/FUS/EGFR/PRKDC/BRCA1	7
	GO:0070301	cellular response to hydrogen peroxide	8.87e-07	1.2e-05	6.41e-06	CDK1/PCNA/HDAC2/EZH2/RELA/SRC/MDM2	7
	GO:2000379	positive regulation of reactive oxygen species metabolic process	1.09e-06	1.42e-05	7.56e-06	GRB2/TP53/AKT1/HSP90AA1/HSP90AB1/SMAD3/EGFR	7
	GO:0008630	intrinsic apoptotic signaling pathway in response to DNA damage	1.24e-06	1.58e-05	8.42e-06	TP53/HNRNPK/EP300/IKBKE/PRKDC/SNW1/BRCA1	7
	GO:0030330	DNA damage response, signal transduction by p53 class mediator	1.5e-06	1.85e-05	9.85e-06	CDK2/TP53/CDK1/PCNA/EP300/BRCA1/MDM2	7
	GO:0032508	DNA duplex unwinding	1.81e-06	2.2e-05	1.17e-05	RPA1/PARP1/RPS27A/XRCC6/UBC/CUL4B/MCM2	7
	GO:0002223	stimulatory C-type lectin receptor signaling pathway	2.17e-06	2.58e-05	1.37e-05	TRAF6/CUL1/EP300/RELA/IKBKG/SRC/CREBBP	7
	GO:0002220	innate immune response activating cell surface receptor signaling pathway	2.58e-06	3.04e-05	1.62e-05	TRAF6/CUL1/EP300/RELA/IKBKG/SRC/CREBBP	7
	GO:0031398	positive regulation of protein ubiquitination	2.74e-06	3.21e-05	1.71e-05	TRAF6/ARRB2/CUL3/HSPA5/HUWE1/BRCA1/BMI1	7
	GO:0006282	regulation of DNA repair	3.62e-06	4.05e-05	2.16e-05	RPA2/PARP1/PCNA/FUS/EGFR/PRKDC/BRCA1	7
	GO:0051101	regulation of DNA binding	4.03e-06	4.49e-05	2.39e-05	TRAF6/PARP1/HDAC2/JUN/EP300/RB1/CTNNB1	7
	GO:0032479	regulation of type I interferon production	4.48e-06	4.92e-05	2.62e-05	XRCC6/EP300/RELA/CTNNB1/IKBKE/PRKDC/CREBBP	7
	GO:0090101	negative regulation of transmembrane receptor protein serine/threonine kinase signaling pathway	4.48e-06	4.92e-05	2.62e-05	TP53/RPS27A/UBC/HSPA5/SMURF1/SMAD2/SMAD3	7
	GO:0032606	type I interferon production	4.98e-06	5.39e-05	2.87e-05	XRCC6/EP300/RELA/CTNNB1/IKBKE/PRKDC/CREBBP	7
	GO:0030183	B cell differentiation	5.8e-06	6.16e-05	3.28e-05	TP53/NTRK1/HDAC5/ITGA4/EP300/VCAM1/PRKDC	7
	GO:0000724	double-strand break repair via homologous recombination	6.74e-06	7.01e-05	3.73e-05	RPA2/RPA1/RPA3/PARP1/FUS/MCM2/BRCA1	7
	GO:0000725	recombinational repair	7.08e-06	7.22e-05	3.84e-05	RPA2/RPA1/RPA3/PARP1/FUS/MCM2/BRCA1	7
	GO:0001889	liver development	7.08e-06	7.22e-05	3.84e-05	PCNA/EZH2/JUN/CUL3/RELA/SMAD3/EGFR	7
	GO:0060359	response to ammonium ion	7.08e-06	7.22e-05	3.84e-05	HDAC2/HDAC5/HSP90AB1/HSPA5/RELA/MAPK1/MDM2	7
	GO:0045814	negative regulation of gene expression, epigenetic	7.43e-06	7.51e-05	4e-05	SUZ12/HDAC2/HDAC1/EED/HDAC5/EZH2/BMI1	7
	GO:0061008	hepaticobiliary system development	8.18e-06	8.14e-05	4.33e-05	PCNA/EZH2/JUN/CUL3/RELA/SMAD3/EGFR	7
	GO:0002224	toll-like receptor signaling pathway	1.18e-05	0.000111817	5.95e-05	TRAF6/RPS27A/UBC/ARRB2/ESR1/IKBKG/IKBKE	7
	GO:0035967	cellular response to topologically incorrect protein	2.23e-05	0.00019172	0.000102067	CUL3/HSPA5/HSPA8/EP300/CUL7/COPS5/VCP	7
	GO:0051170	import into nucleus	2.41e-05	0.000204316	0.000108772	TP53/HNRNPA1/AKT1/FLNA/TARDBP/SMAD3/MAPK1	7
	GO:0090288	negative regulation of cellular response to growth factor stimulus	2.72e-05	0.00022794	0.000121349	TP53/RPS27A/UBC/HSPA5/SMURF1/SMAD2/SMAD3	7
	GO:0035051	cardiocyte differentiation	2.82e-05	0.000235061	0.00012514	HNRNPU/CDK1/ARRB2/OBSL1/VCAM1/EGFR/MAPK1	7
	GO:0038095	Fc-epsilon receptor signaling pathway	3.05e-05	0.000248558	0.000132326	GRB2/TRAF6/JUN/CUL1/RELA/IKBKG/MAPK1	7
	GO:0051100	negative regulation of binding	3.05e-05	0.000248558	0.000132326	AKT1/HDAC2/JUN/ARRB2/ITGA4/HSPA5/ACTB	7
	GO:0043433	negative regulation of DNA-binding transcription factor activity	3.16e-05	0.000256827	0.000136728	FLNA/RNF2/HDAC2/EZH2/ARRB2/ESR1/RB1	7
	GO:0051897	positive regulation of protein kinase B signaling	3.95e-05	0.000307337	0.000163618	GRB2/ARRB2/ESR1/HSP90AA1/HSP90AB1/SRC/EGFR	7
	GO:0019083	viral transcription	4.09e-05	0.000314822	0.000167602	RPL10/RPS27A/HDAC1/JUN/TARDBP/EP300/SNW1	7
	GO:0006611	protein export from nucleus	4.4e-05	0.000331805	0.000176644	TP53/U2AF2/NPM1/YWHAE/XPO1/SMURF1/MDM2	7
	GO:0051099	positive regulation of binding	4.4e-05	0.000331805	0.000176644	APP/TRAF6/PARP1/HSP90AB1/EP300/RB1/CTNNB1	7
	GO:2001235	positive regulation of apoptotic signaling pathway	4.4e-05	0.000331805	0.000176644	TP53/YWHAZ/YWHAG/YWHAE/YWHAB/YWHAQ/SMAD3	7
	GO:0006367	transcription initiation from RNA polymerase II promoter	6e-05	0.000435398	0.000231794	CAND1/TP53/CDK1/ESR1/AR/SNW1/CREBBP	7
	GO:0019080	viral gene expression	6.63e-05	0.000474688	0.000252711	RPL10/RPS27A/HDAC1/JUN/TARDBP/EP300/SNW1	7
	GO:0043112	receptor metabolic process	6.85e-05	0.000488382	0.000260001	GRB2/HNRNPK/HDAC2/HDAC1/ARRB2/SMURF1/CLTC	7
	GO:0007219	Notch signaling pathway	7.08e-05	0.000502383	0.000267455	APP/MYC/AKT1/EP300/EGFR/SNW1/CREBBP	7
	GO:0050679	positive regulation of epithelial cell proliferation	0.000106452	0.000692802	0.000368829	MYC/AKT1/JUN/ITGA4/AR/CTNNB1/EGFR	7
	GO:1901215	negative regulation of neuron death	0.00011305	0.000724013	0.000385445	AKT1/NTRK1/JUN/ARRB2/HSP90AB1/IKBKG/CTNNB1	7
	GO:0043523	regulation of neuron apoptotic process	0.000119976	0.000762297	0.000405827	TP53/PARP1/NTRK1/JUN/ARRB2/HSP90AB1/CTNNB1	7
	GO:0008406	gonad development	0.000146988	0.000907038	0.000482883	FLNA/NTRK1/ARRB2/ESR1/AR/HSPA5/SRC	7
	GO:1903039	positive regulation of leukocyte cell-cell adhesion	0.00015122	0.000919043	0.000489273	GRB2/TRAF6/AKT1/ITGA4/RELA/SRC/VCAM1	7
	GO:0009952	anterior/posterior pattern specification	0.000155551	0.000941801	0.000501389	TP53/RNF2/EP300/SMAD2/CTNNB1/SMAD3/PRKDC	7
	GO:0045137	development of primary sexual characteristics	0.000173891	0.00103682	0.000551976	FLNA/NTRK1/ARRB2/ESR1/AR/HSPA5/SRC	7
	GO:0001894	tissue homeostasis	0.000193944	0.00113991	0.000606855	TRAF6/HSPB1/ACTB/RB1/SRC/CTNNB1/EGFR	7
	GO:0006457	protein folding	0.000193944	0.00113991	0.000606855	CDC37/HSP90AA1/HSP90AB1/HSPB1/HSPA5/HSPA8/VCP	7
	GO:0048588	developmental cell growth	0.000233514	0.00132174	0.000703659	APP/FN1/ITGA4/HSP90AA1/HSP90AB1/SMURF1/CTNNB1	7
	GO:0032872	regulation of stress-activated MAPK cascade	0.000252353	0.00141838	0.000755109	APP/TRAF6/MYC/AKT1/COPS5/EGFR/MAPK1	7
	GO:0070302	regulation of stress-activated protein kinase signaling cascade	0.000265579	0.00147213	0.000783724	APP/TRAF6/MYC/AKT1/COPS5/EGFR/MAPK1	7
	GO:2000027	regulation of animal organ morphogenesis	0.000374613	0.00196794	0.00104768	MYC/ARRB2/ESR1/AR/SMURF1/CTNNB1/CLTC	7
	GO:0022409	positive regulation of cell-cell adhesion	0.000392755	0.00204652	0.00108951	GRB2/TRAF6/AKT1/ITGA4/RELA/SRC/VCAM1	7
	GO:0072659	protein localization to plasma membrane	0.0004412	0.00224106	0.00119308	AKT1/FLNA/AR/ACTB/SMURF1/EGFR/CLTC	7
	GO:0045927	positive regulation of growth	0.000552409	0.00271559	0.00144571	FN1/AKT1/CDK1/SMURF1/EGFR/MAPK1/PRKDC	7
	GO:0060828	regulation of canonical Wnt signaling pathway	0.000775758	0.00361458	0.00192431	HDAC1/CUL3/SRC/CTNNB1/SMAD3/VCP/EGFR	7
	GO:0016236	macroautophagy	0.000929688	0.00417451	0.00222239	CDC37/TP53/AKT1/IKBKG/SMURF1/SRC/VCP	7
	GO:0070372	regulation of ERK1 and ERK2 cascade	0.00102507	0.00453314	0.00241332	APP/FN1/NTRK1/JUN/ARRB2/SRC/EGFR	7
	GO:1903037	regulation of leukocyte cell-cell adhesion	0.00110679	0.00482812	0.00257036	GRB2/TRAF6/AKT1/ITGA4/RELA/SRC/VCAM1	7
	GO:0042113	B cell activation	0.00123889	0.00518623	0.00276101	TP53/NTRK1/HDAC5/ITGA4/EP300/VCAM1/PRKDC	7
	GO:1990778	protein localization to cell periphery	0.00126206	0.00527635	0.00280899	AKT1/FLNA/AR/ACTB/SMURF1/EGFR/CLTC	7
	GO:0060562	epithelial tube morphogenesis	0.00154005	0.0061354	0.00326632	TRAF6/MYC/ESR1/AR/SRC/CTNNB1/SMAD3	7
	GO:0060070	canonical Wnt signaling pathway	0.00192787	0.0073875	0.0039329	HDAC1/CUL3/SRC/CTNNB1/SMAD3/VCP/EGFR	7
	GO:0007159	leukocyte cell-cell adhesion	0.00199372	0.00759454	0.00404313	GRB2/TRAF6/AKT1/ITGA4/RELA/SRC/VCAM1	7
	GO:0031589	cell-substrate adhesion	0.00262647	0.00948774	0.00505101	FN1/FLNA/ITGA4/SRC/CTNNB1/SMAD3/VCAM1	7
	GO:0018108	peptidyl-tyrosine phosphorylation	0.00301872	0.0106436	0.00566637	APP/TP53/HDAC2/NTRK1/ARRB2/SRC/EGFR	7
	GO:0018212	peptidyl-tyrosine modification	0.00315899	0.0110343	0.00587434	APP/TP53/HDAC2/NTRK1/ARRB2/SRC/EGFR	7
	GO:0006909	phagocytosis	0.0033042	0.0114226	0.00608107	GRB2/MYH9/HSP90AA1/HSP90AB1/ACTB/SRC/MAPK1	7
	GO:0022407	regulation of cell-cell adhesion	0.00533097	0.0166226	0.0088494	GRB2/TRAF6/AKT1/ITGA4/RELA/SRC/VCAM1	7
	GO:0001558	regulation of cell growth	0.00631305	0.019022	0.0101268	FN1/TP53/AKT1/SMURF1/RB1/SMAD3/EGFR	7
	GO:0007265	Ras protein signal transduction	0.00930252	0.0259165	0.0137972	GRB2/CDK2/TP53/NTRK1/JUN/CUL3/RB1	7
	GO:0034248	regulation of cellular amide metabolic process	0.0136425	0.0350002	0.0186332	APP/RPL10/AKT1/EEF1A1/NPM1/HSPB1/MAPK1	7
	GO:0022604	regulation of cell morphogenesis	0.0137847	0.0351451	0.0187103	MYH9/FN1/FLNA/OBSL1/CUL7/SMURF1/SRC	7
	GO:0048871	multicellular organismal homeostasis	0.013928	0.0354542	0.0188748	TRAF6/HSPB1/ACTB/RB1/SRC/CTNNB1/EGFR	7
	GO:0042276	error-prone translesion synthesis	6.54e-10	2.66e-08	1.42e-08	RPA2/RPA1/RPA3/PCNA/RPS27A/UBC	6
	GO:0006297	nucleotide-excision repair, DNA gap filling	1.68e-09	5.93e-08	3.16e-08	RPA2/RPA1/RPA3/PCNA/RPS27A/UBC	6
	GO:1900739	regulation of protein insertion into mitochondrial membrane involved in apoptotic signaling pathway	3.79e-09	1.12e-07	5.95e-08	TP53/YWHAZ/YWHAG/YWHAE/YWHAB/YWHAQ	6
	GO:1900740	positive regulation of protein insertion into mitochondrial membrane involved in apoptotic signaling pathway	3.79e-09	1.12e-07	5.95e-08	TP53/YWHAZ/YWHAG/YWHAE/YWHAB/YWHAQ	6
	GO:0001844	protein insertion into mitochondrial membrane involved in apoptotic signaling pathway	9.61e-09	2.45e-07	1.31e-07	TP53/YWHAZ/YWHAG/YWHAE/YWHAB/YWHAQ	6
	GO:0038128	ERBB2 signaling pathway	1.45e-08	3.46e-07	1.84e-07	GRB2/CDC37/CUL5/HSP90AA1/SRC/EGFR	6
	GO:0051204	protein insertion into mitochondrial membrane	1.77e-08	4.01e-07	2.13e-07	TP53/YWHAZ/YWHAG/YWHAE/YWHAB/YWHAQ	6
	GO:1901030	positive regulation of mitochondrial outer membrane permeabilization involved in apoptotic signaling pathway	2.57e-08	5.33e-07	2.84e-07	TP53/YWHAZ/YWHAG/YWHAE/YWHAB/YWHAQ	6
	GO:0070317	negative regulation of G0 to G1 transition	6.94e-08	1.23e-06	6.57e-07	RNF2/SUZ12/EED/EZH2/BRCA1/BMI1	6
	GO:0006284	base-excision repair	8.07e-08	1.41e-06	7.5e-07	RPA2/RPA1/RPA3/TP53/PCNA/HUWE1	6
	GO:1901028	regulation of mitochondrial outer membrane permeabilization involved in apoptotic signaling pathway	1.08e-07	1.82e-06	9.7e-07	TP53/YWHAZ/YWHAG/YWHAE/YWHAB/YWHAQ	6
	GO:0070316	regulation of G0 to G1 transition	1.24e-07	2.05e-06	1.09e-06	RNF2/SUZ12/EED/EZH2/BRCA1/BMI1	6
	GO:0031648	protein destabilization	1.42e-07	2.34e-06	1.24e-06	CUL3/EP300/SRC/PRKDC/CREBBP/MDM2	6
	GO:0045023	G0 to G1 transition	1.62e-07	2.61e-06	1.39e-06	RNF2/SUZ12/EED/EZH2/BRCA1/BMI1	6
	GO:0097345	mitochondrial outer membrane permeabilization	3.78e-07	5.52e-06	2.94e-06	TP53/YWHAZ/YWHAG/YWHAE/YWHAB/YWHAQ	6
	GO:0006977	DNA damage response, signal transduction by p53 class mediator resulting in cell cycle arrest	4.71e-07	6.76e-06	3.6e-06	CDK2/TP53/CDK1/PCNA/EP300/MDM2	6
	GO:1902110	positive regulation of mitochondrial membrane permeability involved in apoptotic process	7.14e-07	9.89e-06	5.26e-06	TP53/YWHAZ/YWHAG/YWHAE/YWHAB/YWHAQ	6
	GO:1902686	mitochondrial outer membrane permeabilization involved in programmed cell death	8.69e-07	1.18e-05	6.3e-06	TP53/YWHAZ/YWHAG/YWHAE/YWHAB/YWHAQ	6
	GO:1904356	regulation of telomere maintenance via telomere lengthening	8.69e-07	1.18e-05	6.3e-06	HNRNPU/HNRNPA1/PARP1/SRC/CTNNB1/MAPK1	6
	GO:0046686	response to cadmium ion	9.56e-07	1.28e-05	6.82e-06	AKT1/CDK1/PCNA/JUN/EGFR/MAPK1	6
	GO:0035794	positive regulation of mitochondrial membrane permeability	1.05e-06	1.38e-05	7.34e-06	TP53/YWHAZ/YWHAG/YWHAE/YWHAB/YWHAQ	6
	GO:0045739	positive regulation of DNA repair	1.15e-06	1.49e-05	7.96e-06	PARP1/PCNA/FUS/EGFR/PRKDC/BRCA1	6
	GO:0006513	protein monoubiquitination	1.26e-06	1.59e-05	8.46e-06	RNF2/CUL3/CUL1/CUL4B/HUWE1/BMI1	6
	GO:1902108	regulation of mitochondrial membrane permeability involved in apoptotic process	1.26e-06	1.59e-05	8.46e-06	TP53/YWHAZ/YWHAG/YWHAE/YWHAB/YWHAQ	6
	GO:1905710	positive regulation of membrane permeability	1.26e-06	1.59e-05	8.46e-06	TP53/YWHAZ/YWHAG/YWHAE/YWHAB/YWHAQ	6
	GO:0042698	ovulation cycle	1.64e-06	2.02e-05	1.07e-05	PCNA/ARRB2/ESR1/HSPA5/SRC/EGFR	6
	GO:0007492	endoderm development	2.91e-06	3.37e-05	1.79e-05	FN1/HDAC1/ITGA4/SMAD2/CTNNB1/SMAD3	6
	GO:0046902	regulation of mitochondrial membrane permeability	2.91e-06	3.37e-05	1.79e-05	TP53/YWHAZ/YWHAG/YWHAE/YWHAB/YWHAQ	6
	GO:0032481	positive regulation of type I interferon production	3.15e-06	3.6e-05	1.92e-05	XRCC6/EP300/RELA/CTNNB1/PRKDC/CREBBP	6
	GO:0072347	response to anesthetic	3.39e-06	3.81e-05	2.03e-05	HDAC2/HDAC5/HSP90AB1/HSPA5/RELA/MDM2	6
	GO:0034502	protein localization to chromosome	4.55e-06	4.96e-05	2.64e-05	RPA2/RPA1/CDK1/EZH2/ESR1/RB1	6
	GO:0051702	interaction with symbiont	4.55e-06	4.96e-05	2.64e-05	FN1/HDAC1/JUN/TARDBP/EP300/SNW1	6
	GO:0090559	regulation of membrane permeability	6e-06	6.33e-05	3.37e-05	TP53/YWHAZ/YWHAG/YWHAE/YWHAB/YWHAQ	6
	GO:0006476	protein deacetylation	9.45e-06	9.18e-05	4.89e-05	TP53/HDAC2/HDAC1/HDAC5/EP300/SIRT7	6
	GO:0031146	SCF-dependent proteasomal ubiquitin-dependent protein catabolic process	1.07e-05	0.000102556	5.46e-05	CUL5/CUL3/CUL1/CUL2/CUL4B/FBXO6	6
	GO:0070498	interleukin-1-mediated signaling pathway	1.44e-05	0.000133237	7.09e-05	TRAF6/RPS27A/UBC/CUL1/RELA/IKBKG	6
	GO:0035601	protein deacylation	1.7e-05	0.000153074	8.15e-05	TP53/HDAC2/HDAC1/HDAC5/EP300/SIRT7	6
	GO:0090100	positive regulation of transmembrane receptor protein serine/threonine kinase signaling pathway	1.8e-05	0.000159528	8.49e-05	PARP1/HSP90AB1/EP300/SMAD2/SNW1/CREBBP	6
	GO:0098732	macromolecule deacylation	1.8e-05	0.000159528	8.49e-05	TP53/HDAC2/HDAC1/HDAC5/EP300/SIRT7	6
	GO:0033138	positive regulation of peptidyl-serine phosphorylation	1.9e-05	0.0001671	8.9e-05	APP/AKT1/ARRB2/HSP90AA1/HSP90AB1/EGFR	6
	GO:1904029	regulation of cyclin-dependent protein kinase activity	2e-05	0.000174844	9.31e-05	CDC37/AKT1/HSP90AB1/ACTB/SRC/EGFR	6
	GO:0062014	negative regulation of small molecule metabolic process	2.11e-05	0.000183064	9.75e-05	TP53/AKT1/PARP1/EP300/CLTC/BRCA1	6
	GO:0006275	regulation of DNA replication	2.23e-05	0.00019172	0.000102067	CDK2/TP53/CDK1/PCNA/JUN/EGFR	6
	GO:0043279	response to alkaloid	2.74e-05	0.000228657	0.000121731	HDAC2/HDAC5/HSP90AB1/HSPA5/RELA/MDM2	6
	GO:0051817	modification of morphology or physiology of other organism involved in symbiotic interaction	2.74e-05	0.000228657	0.000121731	HDAC1/JUN/TARDBP/EP300/SMAD3/SNW1	6
	GO:0034968	histone lysine methylation	3.03e-05	0.000248242	0.000132157	SUZ12/EED/EZH2/CTNNB1/SNW1/BRCA1	6
	GO:0006342	chromatin silencing	4.04e-05	0.000313145	0.00016671	HDAC2/HDAC1/EED/HDAC5/EZH2/BMI1	6
	GO:0007098	centrosome cycle	4.86e-05	0.000362451	0.000192959	CDK2/CDK1/NPM1/XPO1/CTNNB1/BRCA1	6
	GO:0014013	regulation of gliogenesis	4.86e-05	0.000362451	0.000192959	CDK1/HDAC2/HDAC1/EZH2/RELA/CTNNB1	6
	GO:0018022	peptidyl-lysine methylation	6.06e-05	0.000438841	0.000233627	SUZ12/EED/EZH2/CTNNB1/SNW1/BRCA1	6
	GO:0031023	microtubule organizing center organization	7.18e-05	0.000508694	0.000270815	CDK2/CDK1/NPM1/XPO1/CTNNB1/BRCA1	6
	GO:0043484	regulation of RNA splicing	7.8e-05	0.000543067	0.000289114	HNRNPU/HNRNPK/HNRNPA1/U2AF2/FUS/SNW1	6
	GO:0002433	immune response-regulating cell surface receptor signaling pathway involved in phagocytosis	9.17e-05	0.00061186	0.000325738	GRB2/HSP90AA1/HSP90AB1/ACTB/SRC/MAPK1	6
	GO:0016571	histone methylation	9.17e-05	0.00061186	0.000325738	SUZ12/EED/EZH2/CTNNB1/SNW1/BRCA1	6
	GO:0033135	regulation of peptidyl-serine phosphorylation	9.17e-05	0.00061186	0.000325738	APP/AKT1/ARRB2/HSP90AA1/HSP90AB1/EGFR	6
	GO:0038096	Fc-gamma receptor signaling pathway involved in phagocytosis	9.17e-05	0.00061186	0.000325738	GRB2/HSP90AA1/HSP90AB1/ACTB/SRC/MAPK1	6
	GO:0001837	epithelial to mesenchymal transition	9.54e-05	0.000632635	0.000336798	HDAC2/EZH2/CUL7/SMAD2/CTNNB1/SMAD3	6
	GO:0034620	cellular response to unfolded protein	9.54e-05	0.000632635	0.000336798	HSPA5/HSPA8/EP300/CUL7/COPS5/VCP	6
	GO:0038094	Fc-gamma receptor signaling pathway	0.000103204	0.000673022	0.000358299	GRB2/HSP90AA1/HSP90AB1/ACTB/SRC/MAPK1	6
	GO:0006606	protein import into nucleus	0.000107271	0.000693918	0.000369423	TP53/AKT1/FLNA/TARDBP/SMAD3/MAPK1	6
	GO:0002431	Fc receptor mediated stimulatory signaling pathway	0.000115789	0.000740082	0.000394	GRB2/HSP90AA1/HSP90AB1/ACTB/SRC/MAPK1	6
	GO:2001251	negative regulation of chromosome organization	0.000120244	0.000762497	0.000405933	HNRNPU/HNRNPA1/PARP1/MCM2/SRC/BRCA1	6
	GO:0009267	cellular response to starvation	0.000134434	0.000837605	0.000445918	TP53/HNRNPA1/JUN/HSPA5/HSPA8/MAPK1	6
	GO:0000187	activation of MAPK activity	0.000149919	0.000914594	0.000486905	TRAF6/CDK1/RPS27A/UBC/IKBKG/MAPK1	6
	GO:0001890	placenta development	0.000149919	0.000914594	0.000486905	GRB2/AKT1/HSP90AB1/CUL7/EGFR/MAPK1	6
	GO:0006261	DNA-dependent DNA replication	0.000155384	0.000941801	0.000501389	RPA2/CDK2/RPA1/RPA3/PCNA/MCM2	6
	GO:0007088	regulation of mitotic nuclear division	0.000226551	0.00129372	0.00068874	HNRNPU/CUL3/OBSL1/CUL7/RB1/CCDC8	6
	GO:0035821	modification of morphology or physiology of other organism	0.000226551	0.00129372	0.00068874	HDAC1/JUN/TARDBP/EP300/SMAD3/SNW1	6
	GO:0050806	positive regulation of synaptic transmission	0.000258005	0.0014451	0.000769332	APP/STAU1/NTRK1/ARRB2/EGFR/MAPK1	6
	GO:1990138	neuron projection extension	0.000258005	0.0014451	0.000769332	FN1/ITGA4/HSP90AA1/HSP90AB1/SMURF1/CTNNB1	6
	GO:0007051	spindle organization	0.00027497	0.00152156	0.000810038	HNRNPU/MYH9/FLNA/TUBB/VCP/CLTC	6
	GO:0021543	pallium development	0.000292799	0.0016119	0.00085813	FLNA/HDAC1/EZH2/YWHAE/CTNNB1/EGFR	6
	GO:0022406	membrane docking	0.000351788	0.00188186	0.00100185	CDK1/HSP90AA1/YWHAG/YWHAE/TUBB/VCAM1	6
	GO:0006479	protein methylation	0.000362464	0.00192297	0.00102374	SUZ12/EED/EZH2/CTNNB1/SNW1/BRCA1	6
	GO:0008213	protein alkylation	0.000362464	0.00192297	0.00102374	SUZ12/EED/EZH2/CTNNB1/SNW1/BRCA1	6
	GO:0048771	tissue remodeling	0.000362464	0.00192297	0.00102374	TRAF6/TP53/SRC/CTNNB1/EGFR/MDM2	6
	GO:0071347	cellular response to interleukin-1	0.000362464	0.00192297	0.00102374	TRAF6/RPS27A/UBC/CUL1/RELA/IKBKG	6
	GO:1905330	regulation of morphogenesis of an epithelium	0.000373392	0.00196794	0.00104768	ARRB2/ESR1/AR/SMURF1/CTNNB1/CLTC	6
	GO:0061138	morphogenesis of a branching epithelium	0.000396022	0.00206021	0.0010968	GRB2/MYC/ESR1/AR/SRC/CTNNB1	6
	GO:0048639	positive regulation of developmental growth	0.00041971	0.0021521	0.00114572	FN1/AKT1/CDK1/SMURF1/MAPK1/PRKDC	6
	GO:1902275	regulation of chromatin organization	0.000431962	0.00220088	0.00117169	HNRNPU/TP53/EED/CTNNB1/SNW1/BRCA1	6
	GO:0070507	regulation of microtubule cytoskeleton organization	0.000444491	0.00225046	0.00119808	HNRNPU/NPM1/XPO1/CTNNB1/CLTC/BRCA1	6
	GO:0043902	positive regulation of multi-organism process	0.000470401	0.00234835	0.0012502	STAU1/TRAF6/HDAC2/JUN/EP300/SNW1	6
	GO:0051783	regulation of nuclear division	0.000470401	0.00234835	0.0012502	HNRNPU/CUL3/OBSL1/CUL7/RB1/CCDC8	6
	GO:0042594	response to starvation	0.000511459	0.00252975	0.00134677	TP53/HNRNPA1/JUN/HSPA5/HSPA8/MAPK1	6
	GO:0001763	morphogenesis of a branching structure	0.000586038	0.0028504	0.00151747	GRB2/MYC/ESR1/AR/SRC/CTNNB1	6
	GO:0035265	organ growth	0.000722656	0.00341668	0.00181895	AKT1/CDK1/ESR1/AR/SMAD2/MAPK1	6
	GO:0071222	cellular response to lipopolysaccharide	0.000741331	0.0034949	0.00186059	TRAF6/AKT1/HDAC5/RELA/SRC/MAPK1	6
	GO:0006109	regulation of carbohydrate metabolic process	0.000760378	0.00355322	0.00189164	APP/TP53/AKT1/EP300/SRC/CLTC	6
	GO:0050792	regulation of viral process	0.000799605	0.00370422	0.00197203	STAU1/HDAC1/JUN/TARDBP/EP300/SNW1	6
	GO:0035303	regulation of dephosphorylation	0.000819796	0.003776	0.00201024	HSP90AB1/YWHAE/YWHAB/SRC/CCDC8/SMAD3	6
	GO:0051701	interaction with host	0.000819796	0.003776	0.00201024	GRB2/CDK1/SRC/CTNNB1/SMAD3/EGFR	6
	GO:0009612	response to mechanical stimulus	0.000840379	0.00385974	0.00205482	AKT1/NTRK1/JUN/RELA/SRC/EGFR	6
	GO:0071219	cellular response to molecule of bacterial origin	0.000882741	0.0040099	0.00213476	TRAF6/AKT1/HDAC5/RELA/SRC/MAPK1	6
	GO:0045732	positive regulation of protein catabolic process	0.000926732	0.00416706	0.00221843	AKT1/CUL4B/HSP90AA1/SMURF1/VCP/MDM2	6
	GO:0070374	positive regulation of ERK1 and ERK2 cascade	0.000949352	0.00423912	0.00225679	APP/NTRK1/JUN/ARRB2/SRC/EGFR	6
	GO:0032886	regulation of microtubule-based process	0.00101977	0.00451593	0.00240416	HNRNPU/NPM1/XPO1/CTNNB1/CLTC/BRCA1	6
	GO:0007584	response to nutrient	0.00104412	0.00457334	0.00243472	PCNA/RELA/VCAM1/EGFR/SNW1/MDM2	6
	GO:0043903	regulation of symbiosis, encompassing mutualism through parasitism	0.00111984	0.00485867	0.00258663	STAU1/HDAC1/JUN/TARDBP/EP300/SNW1	6
	GO:0097191	extrinsic apoptotic signaling pathway	0.00117261	0.00503332	0.0026796	AKT1/AR/RELA/SRC/SMAD3/BRCA1	6
	GO:0007160	cell-matrix adhesion	0.00119971	0.00506453	0.00269622	FN1/ITGA4/SRC/CTNNB1/SMAD3/VCAM1	6
	GO:0034329	cell junction assembly	0.00170201	0.00666812	0.00354993	FN1/FLNA/ACTB/SRC/CTNNB1/SMAD3	6
	GO:1903362	regulation of cellular protein catabolic process	0.0019267	0.0073875	0.0039329	AKT1/HSP90AA1/HSP90AB1/SMURF1/VCP/MDM2	6
	GO:0010951	negative regulation of endopeptidase activity	0.00204714	0.00771216	0.00410575	APP/AKT1/ARRB2/YWHAE/SRC/MDM2	6
	GO:0021537	telencephalon development	0.00208853	0.00783676	0.00417208	FLNA/HDAC1/EZH2/YWHAE/CTNNB1/EGFR	6
	GO:0007611	learning or memory	0.00230505	0.00858717	0.00457157	APP/NTRK1/JUN/EP300/EGFR/MAPK1	6
	GO:0050730	regulation of peptidyl-tyrosine phosphorylation	0.00230505	0.00858717	0.00457157	APP/TP53/HDAC2/ARRB2/SRC/EGFR	6
	GO:0033673	negative regulation of kinase activity	0.00235031	0.0087217	0.0046432	HNRNPU/AKT1/NPM1/HSPB1/YWHAG/RB1	6
	GO:0003007	heart morphogenesis	0.00244284	0.00890446	0.00474049	TP53/JUN/OBSL1/CTNNB1/SMAD3/MDM2	6
	GO:0010466	negative regulation of peptidase activity	0.00258675	0.00937589	0.00499147	APP/AKT1/ARRB2/YWHAE/SRC/MDM2	6
	GO:0034330	cell junction organization	0.00425635	0.0138645	0.00738107	FN1/FLNA/ACTB/SRC/CTNNB1/SMAD3	6
	GO:0071356	cellular response to tumor necrosis factor	0.00432788	0.0140547	0.00748233	AKT1/RELA/IKBKG/VCAM1/MAPK1/BRCA1	6
	GO:0071826	ribonucleoprotein complex subunit organization	0.00432788	0.0140547	0.00748233	RPL10/NPM1/PAN2/HSP90AA1/HSP90AB1/VCP	6
	GO:0050890	cognition	0.00469897	0.0149576	0.00796303	APP/NTRK1/JUN/EP300/EGFR/MAPK1	6
	GO:0046034	ATP metabolic process	0.00542539	0.0167717	0.00892882	APP/TP53/CDK1/PARP1/HSPA8/VCP	6
	GO:0034612	response to tumor necrosis factor	0.00604492	0.0182998	0.00974234	AKT1/RELA/IKBKG/VCAM1/MAPK1/BRCA1	6
	GO:0043010	camera-type eye development	0.00623106	0.0187925	0.0100046	HDAC2/HDAC1/JUN/CTNNB1/SMAD3/EGFR	6
	GO:0050863	regulation of T cell activation	0.00623106	0.0187925	0.0100046	GRB2/TRAF6/AKT1/SRC/CTNNB1/VCAM1	6
	GO:0006898	receptor-mediated endocytosis	0.00642134	0.0191522	0.0101961	GRB2/HNRNPK/ARRB2/ITGA4/HSP90AA1/CLTC	6
	GO:0007059	chromosome segregation	0.00691555	0.0204735	0.0108995	HNRNPU/CUL3/RB1/CTNNB1/BRCA1/UBE2I	6
	GO:0009615	response to virus	0.00743685	0.0217359	0.0115716	FLNA/HSPB1/RELA/IKBKG/SRC/IKBKE	6
	GO:0001655	urogenital system development	0.00787393	0.0225822	0.0120222	MYC/ESR1/AR/SMAD2/CTNNB1/SMAD3	6
	GO:0051235	maintenance of location	0.00787393	0.0225822	0.0120222	HNRNPU/AKT1/FLNA/HSPA5/YWHAB/IKBKE	6
	GO:0009205	purine ribonucleoside triphosphate metabolic process	0.00844604	0.0239242	0.0127366	APP/TP53/CDK1/PARP1/HSPA8/VCP	6
	GO:0009167	purine ribonucleoside monophosphate metabolic process	0.00904749	0.0252936	0.0134657	APP/TP53/CDK1/PARP1/HSPA8/VCP	6
	GO:0009126	purine nucleoside monophosphate metabolic process	0.00917138	0.0255955	0.0136263	APP/TP53/CDK1/PARP1/HSPA8/VCP	6
	GO:0009199	ribonucleoside triphosphate metabolic process	0.00917138	0.0255955	0.0136263	APP/TP53/CDK1/PARP1/HSPA8/VCP	6
	GO:0009144	purine nucleoside triphosphate metabolic process	0.00929647	0.0259165	0.0137972	APP/TP53/CDK1/PARP1/HSPA8/VCP	6
	GO:0010631	epithelial cell migration	0.0104779	0.0285044	0.0151749	MYH9/AKT1/HDAC5/JUN/HSPB1/SRC	6
	GO:1902903	regulation of supramolecular fiber organization	0.0106155	0.0288494	0.0153587	APP/GRB2/FLNA/HSPA8/RB1/SMAD3	6
	GO:0009161	ribonucleoside monophosphate metabolic process	0.0108945	0.0293841	0.0156433	APP/TP53/CDK1/PARP1/HSPA8/VCP	6
	GO:0090132	epithelium migration	0.0108945	0.0293841	0.0156433	MYH9/AKT1/HDAC5/JUN/HSPB1/SRC	6
	GO:0090130	tissue migration	0.0117627	0.0312538	0.0166387	MYH9/AKT1/HDAC5/JUN/HSPB1/SRC	6
	GO:0001654	eye development	0.0120627	0.0319452	0.0170068	HDAC2/HDAC1/JUN/CTNNB1/SMAD3/EGFR	6
	GO:0009141	nucleoside triphosphate metabolic process	0.0120627	0.0319452	0.0170068	APP/TP53/CDK1/PARP1/HSPA8/VCP	6
	GO:0060271	cilium assembly	0.0126788	0.0331131	0.0176285	FLNA/CDK1/HSP90AA1/YWHAG/YWHAE/TUBB	6
	GO:0150063	visual system development	0.0126788	0.0331131	0.0176285	HDAC2/HDAC1/JUN/CTNNB1/SMAD3/EGFR	6
	GO:0030198	extracellular matrix organization	0.012995	0.0335305	0.0178507	APP/FN1/ITGA4/RB1/SMAD3/VCAM1	6
	GO:0048880	sensory system development	0.0134797	0.0347254	0.0184868	HDAC2/HDAC1/JUN/CTNNB1/SMAD3/EGFR	6
	GO:0009123	nucleoside monophosphate metabolic process	0.0141455	0.0358953	0.0191097	APP/TP53/CDK1/PARP1/HSPA8/VCP	6
	GO:0044782	cilium organization	0.0157272	0.038805	0.0206587	FLNA/CDK1/HSP90AA1/YWHAG/YWHAE/TUBB	6
	GO:0051604	protein maturation	0.018223	0.0436564	0.0232415	MYH9/PARP1/EP300/SRC/CREBBP/MDM2	6
	GO:0007015	actin filament organization	0.0188355	0.0447899	0.023845	GRB2/FLNA/CUL3/OBSL1/SRC/SMAD3	6
	GO:0006293	nucleotide-excision repair, preincision complex stabilization	6.84e-08	1.23e-06	6.54e-07	RPA2/RPA1/RPA3/PARP1/CUL4B	5
	GO:0006295	nucleotide-excision repair, DNA incision, 3'-to lesion	6.84e-08	1.23e-06	6.54e-07	RPA2/RPA1/RPA3/PARP1/CUL4B	5
	GO:0000715	nucleotide-excision repair, DNA damage recognition	1.12e-07	1.88e-06	1e-06	PARP1/RPS27A/UBC/CUL4B/COPS5	5
	GO:2000679	positive regulation of transcription regulatory region DNA binding	1.76e-07	2.81e-06	1.5e-06	TRAF6/PARP1/EP300/RB1/CTNNB1	5
	GO:0043921	modulation by host of viral transcription	2.65e-07	3.94e-06	2.1e-06	HDAC1/JUN/TARDBP/EP300/SNW1	5
	GO:0052472	modulation by host of symbiont transcription	2.65e-07	3.94e-06	2.1e-06	HDAC1/JUN/TARDBP/EP300/SNW1	5
	GO:2000144	positive regulation of DNA-templated transcription, initiation	2.65e-07	3.94e-06	2.1e-06	CAND1/TP53/JUN/ESR1/CTNNB1	5
	GO:0052312	modulation of transcription in other organism involved in symbiotic interaction	3.21e-07	4.71e-06	2.51e-06	HDAC1/JUN/TARDBP/EP300/SNW1	5
	GO:1904837	beta-catenin-TCF complex assembly	4.62e-07	6.66e-06	3.54e-06	MYC/HDAC1/EP300/CTNNB1/CREBBP	5
	GO:0070423	nucleotide-binding oligomerization domain containing signaling pathway	1.03e-06	1.36e-05	7.23e-06	TRAF6/RPS27A/UBC/RELA/IKBKG	5
	GO:0035872	nucleotide-binding domain, leucine rich repeat containing receptor signaling pathway	1.19e-06	1.53e-05	8.12e-06	TRAF6/RPS27A/UBC/RELA/IKBKG	5
	GO:0045740	positive regulation of DNA replication	1.19e-06	1.53e-05	8.12e-06	CDK2/CDK1/PCNA/JUN/EGFR	5
	GO:0051973	positive regulation of telomerase activity	1.19e-06	1.53e-05	8.12e-06	MYC/HSP90AA1/HSP90AB1/CTNNB1/MAPK1	5
	GO:2000142	regulation of DNA-templated transcription, initiation	1.37e-06	1.72e-05	9.14e-06	CAND1/TP53/JUN/ESR1/CTNNB1	5
	GO:0033146	regulation of intracellular estrogen receptor signaling pathway	1.8e-06	2.2e-05	1.17e-05	PARP1/ESR1/AR/SRC/BRCA1	5
	GO:0016574	histone ubiquitination	3.72e-06	4.15e-05	2.21e-05	RNF2/SUZ12/CUL4B/HUWE1/BMI1	5
	GO:0035196	production of miRNAs involved in gene silencing by miRNA	4.16e-06	4.61e-05	2.45e-05	TP53/ESR1/SMAD2/SMAD3/EGFR	5
	GO:0035094	response to nicotine	5.71e-06	6.08e-05	3.24e-05	HDAC2/NTRK1/RELA/VCAM1/MAPK1	5
	GO:1990090	cellular response to nerve growth factor stimulus	5.71e-06	6.08e-05	3.24e-05	APP/AKT1/CDC5L/NTRK1/HSPA5	5
	GO:0010718	positive regulation of epithelial to mesenchymal transition	6.32e-06	6.62e-05	3.52e-05	HDAC2/EZH2/SMAD2/CTNNB1/SMAD3	5
	GO:0031050	dsRNA processing	6.97e-06	7.19e-05	3.83e-05	TP53/ESR1/SMAD2/SMAD3/EGFR	5
	GO:0070918	production of small RNA involved in gene silencing by RNA	6.97e-06	7.19e-05	3.83e-05	TP53/ESR1/SMAD2/SMAD3/EGFR	5
	GO:1990089	response to nerve growth factor	7.69e-06	7.72e-05	4.11e-05	APP/AKT1/CDC5L/NTRK1/HSPA5	5
	GO:2000677	regulation of transcription regulatory region DNA binding	7.69e-06	7.72e-05	4.11e-05	TRAF6/PARP1/EP300/RB1/CTNNB1	5
	GO:0036297	interstrand cross-link repair	8.45e-06	8.36e-05	4.45e-05	RPA2/RPA1/RPA3/RPS27A/UBC	5
	GO:0032210	regulation of telomere maintenance via telomerase	9.27e-06	9.06e-05	4.82e-05	HNRNPU/HNRNPA1/SRC/CTNNB1/MAPK1	5
	GO:0042220	response to cocaine	1.02e-05	9.78e-05	5.21e-05	HDAC2/HDAC5/HSP90AB1/HSPA5/MDM2	5
	GO:0030520	intracellular estrogen receptor signaling pathway	1.32e-05	0.00012352	6.58e-05	PARP1/ESR1/AR/SRC/BRCA1	5
	GO:1904589	regulation of protein import	1.32e-05	0.00012352	6.58e-05	FLNA/TARDBP/HSPA8/SMAD3/MAPK1	5
	GO:0043388	positive regulation of DNA binding	1.44e-05	0.000133237	7.09e-05	TRAF6/PARP1/EP300/RB1/CTNNB1	5
	GO:0033260	nuclear DNA replication	1.56e-05	0.000142692	7.6e-05	RPA2/RPA1/RPA3/PCNA/MCM2	5
	GO:1902808	positive regulation of cell cycle G1/S phase transition	1.56e-05	0.000142692	7.6e-05	AKT1/EZH2/CUL4B/EGFR/MDM2	5
	GO:0002753	cytoplasmic pattern recognition receptor signaling pathway	1.84e-05	0.000162144	8.63e-05	TRAF6/RPS27A/UBC/RELA/IKBKG	5
	GO:0034394	protein localization to cell surface	1.99e-05	0.00017396	9.26e-05	AKT1/FLNA/HSP90AB1/SMURF1/CTNNB1	5
	GO:0046782	regulation of viral transcription	2.15e-05	0.000185397	9.87e-05	HDAC1/JUN/TARDBP/EP300/SNW1	5
	GO:0044786	cell cycle DNA replication	3.56e-05	0.000282486	0.000150388	RPA2/RPA1/RPA3/PCNA/MCM2	5
	GO:0071479	cellular response to ionizing radiation	3.56e-05	0.000282486	0.000150388	GRB2/TP53/XRCC6/HSPA5/MDM2	5
	GO:0061180	mammary gland epithelium development	3.81e-05	0.000300091	0.00015976	AKT1/ESR1/AR/SRC/MAPK1	5
	GO:0043627	response to estrogen	4.07e-05	0.000313901	0.000167112	ESR1/EP300/MAPK1/BRCA1/MDM2	5
	GO:0045685	regulation of glial cell differentiation	4.07e-05	0.000313901	0.000167112	CDK1/HDAC2/HDAC1/RELA/CTNNB1	5
	GO:0016575	histone deacetylation	5.27e-05	0.000385775	0.000205376	TP53/HDAC2/HDAC1/HDAC5/SIRT7	5
	GO:0051851	modification by host of symbiont morphology or physiology	5.27e-05	0.000385775	0.000205376	HDAC1/JUN/TARDBP/EP300/SNW1	5
	GO:1901224	positive regulation of NIK/NF-kappaB signaling	5.27e-05	0.000385775	0.000205376	APP/TRAF6/EP300/RELA/EGFR	5
	GO:0072332	intrinsic apoptotic signaling pathway by p53 class mediator	5.61e-05	0.000408635	0.000217546	TP53/HNRNPK/EP300/SNW1/MDM2	5
	GO:0031145	anaphase-promoting complex-dependent catabolic process	6.72e-05	0.000480029	0.000255554	CDK2/CDK1/RPS27A/UBC/CUL3	5
	GO:0043154	negative regulation of cysteine-type endopeptidase activity involved in apoptotic process	8e-05	0.000554029	0.00029495	AKT1/ARRB2/YWHAE/SRC/MDM2	5
	GO:0001942	hair follicle development	8.95e-05	0.000608063	0.000323716	HDAC2/HDAC1/RELA/CTNNB1/EGFR	5
	GO:0022404	molting cycle process	9.98e-05	0.000653489	0.0003479	HDAC2/HDAC1/RELA/CTNNB1/EGFR	5
	GO:0022405	hair cycle process	9.98e-05	0.000653489	0.0003479	HDAC2/HDAC1/RELA/CTNNB1/EGFR	5
	GO:0098773	skin epidermis development	9.98e-05	0.000653489	0.0003479	HDAC2/HDAC1/RELA/CTNNB1/EGFR	5
	GO:1903321	negative regulation of protein modification by small protein conjugation or removal	9.98e-05	0.000653489	0.0003479	AKT1/U2AF2/ARRB2/RELA/CTNNB1	5
	GO:0010717	regulation of epithelial to mesenchymal transition	0.000111041	0.000712568	0.000379352	HDAC2/EZH2/SMAD2/CTNNB1/SMAD3	5
	GO:0030901	midbrain development	0.000111041	0.000712568	0.000379352	HSPA5/YWHAE/ACTB/YWHAQ/CTNNB1	5
	GO:0031058	positive regulation of histone modification	0.000111041	0.000712568	0.000379352	TP53/EED/CTNNB1/SNW1/BRCA1	5
	GO:2000117	negative regulation of cysteine-type endopeptidase activity	0.000123227	0.00077987	0.000415182	AKT1/ARRB2/YWHAE/SRC/MDM2	5
	GO:1901655	cellular response to ketone	0.000129691	0.000809626	0.000431023	AKT1/CDC5L/AR/SRC/EGFR	5
	GO:0097711	ciliary basal body-plasma membrane docking	0.000143397	0.000886581	0.000471992	CDK1/HSP90AA1/YWHAG/YWHAE/TUBB	5
	GO:1903076	regulation of protein localization to plasma membrane	0.000143397	0.000886581	0.000471992	AKT1/AR/ACTB/EGFR/CLTC	5
	GO:0097327	response to antineoplastic agent	0.000150653	0.000917326	0.000488359	HNRNPA1/PCNA/CTNNB1/EGFR/BRCA1	5
	GO:0048024	regulation of mRNA splicing, via spliceosome	0.000166003	0.000997569	0.000531079	HNRNPU/HNRNPK/HNRNPA1/U2AF2/SNW1	5
	GO:2001243	negative regulation of intrinsic apoptotic signaling pathway	0.000166003	0.000997569	0.000531079	AKT1/HDAC1/HSPB1/SRC/MDM2	5
	GO:0035282	segmentation	0.000182521	0.00108467	0.000577447	TP53/EP300/SMAD3/PRKDC/BMI1	5
	GO:0048661	positive regulation of smooth muscle cell proliferation	0.000191236	0.00112812	0.000600578	TRAF6/AKT1/JUN/EGFR/MDM2	5
	GO:1903008	organelle disassembly	0.000191236	0.00112812	0.000600578	CDC37/TP53/CDK1/SMURF1/VCP	5
	GO:0000079	regulation of cyclin-dependent protein serine/threonine kinase activity	0.000200265	0.00116574	0.00062061	CDC37/AKT1/ACTB/SRC/EGFR	5
	GO:0007229	integrin-mediated signaling pathway	0.000209615	0.00120773	0.000642961	MYH9/FLNA/CUL3/ITGA4/SRC	5
	GO:0032091	negative regulation of protein binding	0.000209615	0.00120773	0.000642961	AKT1/ARRB2/ITGA4/HSPA5/ACTB	5
	GO:0032652	regulation of interleukin-1 production	0.000209615	0.00120773	0.000642961	APP/HDAC2/ARRB2/HSPB1/SMAD3	5
	GO:1905269	positive regulation of chromatin organization	0.000209615	0.00120773	0.000642961	TP53/EED/CTNNB1/SNW1/BRCA1	5
	GO:2001237	negative regulation of extrinsic apoptotic signaling pathway	0.000219294	0.00125899	0.000670249	AKT1/AR/RELA/SRC/BRCA1	5
	GO:0008593	regulation of Notch signaling pathway	0.000229311	0.00130253	0.000693433	AKT1/EP300/EGFR/SNW1/CREBBP	5
	GO:0045185	maintenance of protein location	0.000229311	0.00130253	0.000693433	HNRNPU/AKT1/FLNA/HSPA5/YWHAB	5
	GO:0042303	molting cycle	0.000309515	0.00168374	0.000896378	HDAC2/HDAC1/RELA/CTNNB1/EGFR	5
	GO:0042633	hair cycle	0.000309515	0.00168374	0.000896378	HDAC2/HDAC1/RELA/CTNNB1/EGFR	5
	GO:0042752	regulation of circadian rhythm	0.000335917	0.00180597	0.000961452	TP53/CDK1/EZH2/TARDBP/PRKDC	5
	GO:0032612	interleukin-1 production	0.00034974	0.00187403	0.00099768	APP/HDAC2/ARRB2/HSPB1/SMAD3	5
	GO:1904375	regulation of protein localization to cell periphery	0.00034974	0.00187403	0.00099768	AKT1/AR/ACTB/EGFR/CLTC	5
	GO:0002761	regulation of myeloid leukocyte differentiation	0.000378675	0.00197958	0.00105387	TRAF6/MYC/JUN/RB1/CTNNB1	5
	GO:1901222	regulation of NIK/NF-kappaB signaling	0.000378675	0.00197958	0.00105387	APP/TRAF6/EP300/RELA/EGFR	5
	GO:0007173	epidermal growth factor receptor signaling pathway	0.000409384	0.00212285	0.00113015	APP/GRB2/AKT1/SRC/EGFR	5
	GO:0022612	gland morphogenesis	0.000425426	0.00217102	0.00115579	CUL3/ESR1/AR/SRC/EGFR	5
	GO:0001704	formation of primary germ layer	0.000441938	0.00224106	0.00119308	FN1/ITGA4/SMAD2/CTNNB1/SMAD3	5
	GO:0030968	endoplasmic reticulum unfolded protein response	0.000441938	0.00224106	0.00119308	HSPA5/EP300/CUL7/COPS5/VCP	5
	GO:1903578	regulation of ATP metabolic process	0.000458929	0.00231263	0.00123118	APP/TP53/CDK1/PARP1/VCP	5
	GO:0042177	negative regulation of protein catabolic process	0.000657182	0.00316294	0.00168386	FLNA/HSP90AB1/RELA/SMAD3/EGFR	5
	GO:0042476	odontogenesis	0.000657182	0.00316294	0.00168386	TRAF6/HDAC2/HDAC1/SRC/CTNNB1	5
	GO:0030260	entry into host cell	0.000703503	0.00334086	0.00177859	GRB2/CDK1/SRC/CTNNB1/EGFR	5
	GO:0032355	response to estradiol	0.000703503	0.00334086	0.00177859	PCNA/EZH2/ESR1/CTNNB1/EGFR	5
	GO:0044409	entry into host	0.000703503	0.00334086	0.00177859	GRB2/CDK1/SRC/CTNNB1/EGFR	5
	GO:0048565	digestive tract development	0.000703503	0.00334086	0.00177859	RB1/SMAD2/CTNNB1/SMAD3/EGFR	5
	GO:0051806	entry into cell of other organism involved in symbiotic interaction	0.000703503	0.00334086	0.00177859	GRB2/CDK1/SRC/CTNNB1/EGFR	5
	GO:0051828	entry into other organism involved in symbiotic interaction	0.000703503	0.00334086	0.00177859	GRB2/CDK1/SRC/CTNNB1/EGFR	5
	GO:0050684	regulation of mRNA processing	0.000777513	0.00361752	0.00192587	HNRNPU/HNRNPK/HNRNPA1/U2AF2/SNW1	5
	GO:1903364	positive regulation of cellular protein catabolic process	0.00085719	0.00393134	0.00209294	AKT1/HSP90AA1/SMURF1/VCP/MDM2	5
	GO:0007030	Golgi organization	0.00091359	0.00411371	0.00219003	CDK1/OBSL1/YWHAZ/CUL7/MAPK1	5
	GO:1900542	regulation of purine nucleotide metabolic process	0.00091359	0.00411371	0.00219003	APP/TP53/CDK1/PARP1/VCP	5
	GO:0030879	mammary gland development	0.000942805	0.00421574	0.00224435	AKT1/ESR1/AR/SRC/MAPK1	5
	GO:0031056	regulation of histone modification	0.000942805	0.00421574	0.00224435	TP53/EED/CTNNB1/SNW1/BRCA1	5
	GO:0044344	cellular response to fibroblast growth factor stimulus	0.000942805	0.00421574	0.00224435	GRB2/HNRNPA1/CDC5L/CTNNB1/MAPK1	5
	GO:0006140	regulation of nucleotide metabolic process	0.00103463	0.00454775	0.0024211	APP/TP53/CDK1/PARP1/VCP	5
	GO:0055123	digestive system development	0.00103463	0.00454775	0.0024211	RB1/SMAD2/CTNNB1/SMAD3/EGFR	5
	GO:2000241	regulation of reproductive process	0.00103463	0.00454775	0.0024211	HDAC2/ESR1/AR/SRC/CTNNB1	5
	GO:0014065	phosphatidylinositol 3-kinase signaling	0.00109943	0.00480253	0.00255674	AKT1/NTRK1/SRC/EGFR/MAPK1	5
	GO:0014074	response to purine-containing compound	0.00113294	0.00490227	0.00260984	APP/HDAC2/JUN/HSPA5/RELA	5
	GO:2000058	regulation of ubiquitin-dependent protein catabolic process	0.00113294	0.00490227	0.00260984	AKT1/HSP90AB1/SMURF1/VCP/MDM2	5
	GO:0048754	branching morphogenesis of an epithelial tube	0.00116719	0.00501675	0.00267078	MYC/ESR1/AR/SRC/CTNNB1	5
	GO:0071774	response to fibroblast growth factor	0.00116719	0.00501675	0.00267078	GRB2/HNRNPA1/CDC5L/CTNNB1/MAPK1	5
	GO:0016202	regulation of striated muscle tissue development	0.001238	0.00518623	0.00276101	CDK1/ARRB2/CTNNB1/SMAD3/MAPK1	5
	GO:0030902	hindbrain development	0.001238	0.00518623	0.00276101	TP53/FLNA/EZH2/HSPA5/CTNNB1	5
	GO:0062013	positive regulation of small molecule metabolic process	0.00127458	0.00532179	0.00283318	APP/AKT1/CDK1/SRC/VCP	5
	GO:1901861	regulation of muscle tissue development	0.00135012	0.00557923	0.00297023	CDK1/ARRB2/CTNNB1/SMAD3/MAPK1	5
	GO:2001236	regulation of extrinsic apoptotic signaling pathway	0.00135012	0.00557923	0.00297023	AKT1/AR/RELA/SRC/BRCA1	5
	GO:0048634	regulation of muscle organ development	0.00138911	0.0056964	0.00303261	CDK1/ARRB2/CTNNB1/SMAD3/MAPK1	5
	GO:0051053	negative regulation of DNA metabolic process	0.00138911	0.0056964	0.00303261	HNRNPU/TP53/HNRNPA1/PARP1/SRC	5
	GO:0043467	regulation of generation of precursor metabolites and energy	0.00146957	0.00591321	0.00314803	APP/TP53/AKT1/CDK1/VCP	5
	GO:0046661	male sex differentiation	0.00155341	0.00618095	0.00329057	FLNA/NTRK1/ESR1/AR/CTNNB1	5
	GO:0031960	response to corticosteroid	0.00164072	0.00648025	0.00344991	HNRNPU/PARP1/PCNA/SRC/EGFR	5
	GO:0140056	organelle localization by membrane tethering	0.0019749	0.0075318	0.00400972	CDK1/HSP90AA1/YWHAG/YWHAE/TUBB	5
	GO:0016241	regulation of macroautophagy	0.0020789	0.00781716	0.00416165	CDC37/TP53/AKT1/IKBKG/SMURF1	5
	GO:0030324	lung development	0.00213238	0.00797163	0.00424388	EP300/SMAD2/CTNNB1/EGFR/MAPK1	5
	GO:0030323	respiratory tube development	0.00235637	0.0087217	0.0046432	EP300/SMAD2/CTNNB1/EGFR/MAPK1	5
	GO:0030705	cytoskeleton-dependent intracellular transport	0.00259704	0.00940257	0.00500567	APP/HNRNPU/HSPB1/HSPA8/TUBB	5
	GO:0048015	phosphatidylinositol-mediated signaling	0.00265989	0.00959771	0.00510956	AKT1/NTRK1/SRC/EGFR/MAPK1	5
	GO:0048017	inositol lipid-mediated signaling	0.00285508	0.0101539	0.00540564	AKT1/NTRK1/SRC/EGFR/MAPK1	5
	GO:0046328	regulation of JNK cascade	0.00292239	0.0103475	0.0055087	APP/TRAF6/AKT1/COPS5/EGFR	5
	GO:0006413	translational initiation	0.00350288	0.0119114	0.00634129	RPL10/RPS27A/NPM1/HSPB1/COPS5	5
	GO:0050657	nucleic acid transport	0.00350288	0.0119114	0.00634129	HNRNPU/HNRNPA1/U2AF2/NPM1/XPO1	5
	GO:0050658	RNA transport	0.00350288	0.0119114	0.00634129	HNRNPU/HNRNPA1/U2AF2/NPM1/XPO1	5
	GO:1902115	regulation of organelle assembly	0.00358086	0.0120802	0.00643119	HNRNPU/NPM1/PAN2/SRC/BRCA1	5
	GO:0051236	establishment of RNA localization	0.00374055	0.0125531	0.00668294	HNRNPU/HNRNPA1/U2AF2/NPM1/XPO1	5
	GO:0010952	positive regulation of peptidase activity	0.00382229	0.012814	0.00682184	APP/MYC/FN1/SMAD3/VCP	5
	GO:0031099	regeneration	0.0039053	0.0130259	0.00693463	CDK1/PCNA/EZH2/JUN/EGFR	5
	GO:0060541	respiratory system development	0.0039053	0.0130259	0.00693463	EP300/SMAD2/CTNNB1/EGFR/MAPK1	5
	GO:0031032	actomyosin structure organization	0.00398959	0.0131419	0.00699642	MYH9/CUL3/OBSL1/SRC/SMAD3	5
	GO:0050852	T cell receptor signaling pathway	0.0042503	0.0138645	0.00738107	TRAF6/CUL1/RELA/IKBKG/MAPK1	5
	GO:0050870	positive regulation of T cell activation	0.0042503	0.0138645	0.00738107	GRB2/TRAF6/AKT1/SRC/VCAM1	5
	GO:1902905	positive regulation of supramolecular fiber organization	0.00443072	0.0141707	0.0075441	APP/GRB2/FLNA/RB1/SMAD3	5
	GO:0002064	epithelial cell development	0.00471152	0.0149827	0.0079764	FLNA/NTRK1/ESR1/AR/CTNNB1	5
	GO:0071229	cellular response to acid chemical	0.00490562	0.0154019	0.00819957	AKT1/HDAC2/SRC/EGFR/SNW1	5
	GO:1903050	regulation of proteolysis involved in cellular protein catabolic process	0.00541565	0.0167578	0.00892138	AKT1/HSP90AB1/SMURF1/VCP/MDM2	5
	GO:0050807	regulation of synapse organization	0.00584988	0.017895	0.00952683	APP/NTRK1/YWHAZ/TUBB/VCP	5
	GO:0001649	osteoblast differentiation	0.006668	0.0198247	0.0105541	HNRNPU/AKT1/CTNNB1/SMAD3/CLTC	5
	GO:0050803	regulation of synapse structure or activity	0.00691577	0.0204735	0.0108995	APP/NTRK1/YWHAZ/TUBB/VCP	5
	GO:0006403	RNA localization	0.00729943	0.0213731	0.0113785	HNRNPU/HNRNPA1/U2AF2/NPM1/XPO1	5
	GO:0016358	dendrite development	0.00769773	0.0221673	0.0118013	APP/HDAC2/EZH2/OBSL1/CUL7	5
	GO:0048738	cardiac muscle tissue development	0.00769773	0.0221673	0.0118013	HNRNPU/CDK1/ARRB2/OBSL1/MAPK1	5
	GO:0006469	negative regulation of protein kinase activity	0.00797154	0.0228012	0.0121387	AKT1/NPM1/HSPB1/YWHAG/RB1	5
	GO:0046777	protein autophosphorylation	0.00797154	0.0228012	0.0121387	AKT1/NTRK1/JUN/SRC/EGFR	5
	GO:0015931	nucleobase-containing compound transport	0.00883356	0.0248251	0.0132162	HNRNPU/HNRNPA1/U2AF2/NPM1/XPO1	5
	GO:0048863	stem cell differentiation	0.0114438	0.030578	0.0162789	HNRNPU/FN1/TP53/ESR1/MAPK1	5
	GO:0031330	negative regulation of cellular catabolic process	0.0127356	0.0332346	0.0176932	HNRNPU/TP53/AKT1/TARDBP/HSP90AB1	5
	GO:0045165	cell fate commitment	0.0139189	0.0354542	0.0188748	TP53/AR/SMAD2/CTNNB1/PRKDC	5
	GO:1902105	regulation of leukocyte differentiation	0.0143293	0.0363317	0.019342	TRAF6/MYC/JUN/RB1/CTNNB1	5
	GO:0007411	axon guidance	0.0151743	0.0378474	0.0201489	APP/GRB2/NTRK1/SRC/MAPK1	5
	GO:0022618	ribonucleoprotein complex assembly	0.0153906	0.0380915	0.0202789	RPL10/NPM1/PAN2/HSP90AA1/HSP90AB1	5
	GO:0097485	neuron projection guidance	0.0153906	0.0380915	0.0202789	APP/GRB2/NTRK1/SRC/MAPK1	5
	GO:0015980	energy derivation by oxidation of organic compounds	0.0171964	0.0415999	0.0221467	MYC/TP53/AKT1/CDK1/VCP	5
	GO:0010632	regulation of epithelial cell migration	0.0186396	0.0445054	0.0236935	AKT1/HDAC5/JUN/HSPB1/SRC	5
	GO:0050768	negative regulation of neurogenesis	0.0196449	0.0464059	0.0247052	APP/TP53/HDAC2/CTNNB1/MDM2	5
	GO:1903522	regulation of blood circulation	0.0201607	0.0475196	0.0252981	AKT1/FLNA/YWHAE/EGFR/MDM2	5
	GO:0061029	eyelid development in camera-type eye	4.92e-07	7e-06	3.73e-06	HDAC2/HDAC1/JUN/EGFR	4
	GO:0043586	tongue development	3.24e-06	3.67e-05	1.95e-05	HDAC2/HDAC1/CTNNB1/EGFR	4
	GO:0070932	histone H3 deacetylation	3.24e-06	3.67e-05	1.95e-05	HDAC2/HDAC1/HDAC5/SIRT7	4
	GO:0000717	nucleotide-excision repair, DNA duplex unwinding	4.86e-06	5.27e-05	2.81e-05	PARP1/RPS27A/UBC/CUL4B	4
	GO:0070911	global genome nucleotide-excision repair	9.77e-06	9.46e-05	5.03e-05	PARP1/RPS27A/UBC/CUL4B	4
	GO:0032201	telomere maintenance via semi-conservative replication	1.14e-05	0.000108279	5.76e-05	RPA2/RPA1/RPA3/PCNA	4
	GO:1904357	negative regulation of telomere maintenance via telomere lengthening	1.14e-05	0.000108279	5.76e-05	HNRNPU/HNRNPA1/PARP1/SRC	4
	GO:0030511	positive regulation of transforming growth factor beta receptor signaling pathway	1.53e-05	0.000140795	7.5e-05	HSP90AB1/EP300/SNW1/CREBBP	4
	GO:0035666	TRIF-dependent toll-like receptor signaling pathway	1.53e-05	0.000140795	7.5e-05	RPS27A/UBC/IKBKG/IKBKE	4
	GO:1903846	positive regulation of cellular response to transforming growth factor beta stimulus	1.53e-05	0.000140795	7.5e-05	HSP90AB1/EP300/SNW1/CREBBP	4
	GO:0071480	cellular response to gamma radiation	1.76e-05	0.000157308	8.37e-05	TP53/XRCC6/HSPA5/MDM2	4
	GO:1902895	positive regulation of pri-miRNA transcription by RNA polymerase II	2.01e-05	0.000175026	9.32e-05	TP53/JUN/RELA/SMAD3	4
	GO:0002756	MyD88-independent toll-like receptor signaling pathway	2.6e-05	0.000218703	0.000116432	RPS27A/UBC/IKBKG/IKBKE	4
	GO:1904031	positive regulation of cyclin-dependent protein kinase activity	3.3e-05	0.000267115	0.000142205	AKT1/HSP90AB1/SRC/EGFR	4
	GO:0032205	negative regulation of telomere maintenance	3.7e-05	0.000292664	0.000155807	HNRNPU/HNRNPA1/PARP1/SRC	4
	GO:0042307	positive regulation of protein import into nucleus	4.13e-05	0.000315928	0.000168192	FLNA/TARDBP/SMAD3/MAPK1	4
	GO:0071276	cellular response to cadmium ion	4.13e-05	0.000315928	0.000168192	AKT1/JUN/EGFR/MAPK1	4
	GO:0006298	mismatch repair	4.59e-05	0.000344302	0.000183297	RPA2/RPA1/RPA3/PCNA	4
	GO:0046825	regulation of protein export from nucleus	4.59e-05	0.000344302	0.000183297	TP53/YWHAE/XPO1/MDM2	4
	GO:2000279	negative regulation of DNA biosynthetic process	4.59e-05	0.000344302	0.000183297	HNRNPU/TP53/HNRNPA1/SRC	4
	GO:0031062	positive regulation of histone methylation	5.1e-05	0.000375977	0.00020016	EED/CTNNB1/SNW1/BRCA1	4
	GO:1904591	positive regulation of protein import	5.1e-05	0.000375977	0.00020016	FLNA/TARDBP/SMAD3/MAPK1	4
	GO:1902893	regulation of pri-miRNA transcription by RNA polymerase II	6.23e-05	0.000446908	0.000237922	TP53/JUN/RELA/SMAD3	4
	GO:0021762	substantia nigra development	7.53e-05	0.000527307	0.000280724	HSPA5/YWHAE/ACTB/YWHAQ	4
	GO:0045429	positive regulation of nitric oxide biosynthetic process	7.53e-05	0.000527307	0.000280724	AKT1/HSP90AA1/HSP90AB1/SMAD3	4
	GO:1904646	cellular response to amyloid-beta	7.53e-05	0.000527307	0.000280724	APP/PARP1/ITGA4/VCAM1	4
	GO:0061756	leukocyte adhesion to vascular endothelial cell	8.25e-05	0.000567816	0.00030229	TRAF6/ITGA4/RELA/VCAM1	4
	GO:1904407	positive regulation of nitric oxide metabolic process	8.25e-05	0.000567816	0.00030229	AKT1/HSP90AA1/HSP90AB1/SMAD3	4
	GO:0042771	intrinsic apoptotic signaling pathway in response to DNA damage by p53 class mediator	9.02e-05	0.000608063	0.000323716	TP53/HNRNPK/EP300/SNW1	4
	GO:0048483	autonomic nervous system development	9.02e-05	0.000608063	0.000323716	FN1/NTRK1/CTNNB1/VCAM1	4
	GO:0022602	ovulation cycle process	9.84e-05	0.000649299	0.000345669	ARRB2/ESR1/HSPA5/SRC	4
	GO:0061614	pri-miRNA transcription by RNA polymerase II	0.000107073	0.000693918	0.000369423	TP53/JUN/RELA/SMAD3	4
	GO:0070849	response to epidermal growth factor	0.000107073	0.000693918	0.000369423	AKT1/EEF1A1/EGFR/MAPK1	4
	GO:0048546	digestive tract morphogenesis	0.000126172	0.000793823	0.00042261	SMAD2/CTNNB1/SMAD3/EGFR	4
	GO:0001706	endoderm formation	0.000136594	0.000847781	0.000451336	FN1/ITGA4/SMAD2/CTNNB1	4
	GO:1900087	positive regulation of G1/S transition of mitotic cell cycle	0.000136594	0.000847781	0.000451336	AKT1/CUL4B/EGFR/MDM2	4
	GO:0072132	mesenchyme morphogenesis	0.000159287	0.000962611	0.000512468	MYC/SMAD2/SMAD3/MDM2	4
	GO:1904645	response to amyloid-beta	0.000184587	0.00109332	0.000582056	APP/PARP1/ITGA4/VCAM1	4
	GO:0042306	regulation of protein import into nucleus	0.000198267	0.00116319	0.000619252	FLNA/TARDBP/SMAD3/MAPK1	4
	GO:1903428	positive regulation of reactive oxygen species biosynthetic process	0.000227799	0.00129853	0.000691305	AKT1/HSP90AA1/HSP90AB1/SMAD3	4
	GO:0046605	regulation of centrosome cycle	0.000243694	0.00137452	0.000731757	NPM1/XPO1/CTNNB1/BRCA1	4
	GO:0001836	release of cytochrome c from mitochondria	0.000260371	0.00145077	0.00077235	TP53/AKT1/JUN/ARRB2	4
	GO:0032732	positive regulation of interleukin-1 production	0.000260371	0.00145077	0.00077235	APP/HDAC2/HSPB1/SMAD3	4
	GO:0070527	platelet aggregation	0.000260371	0.00145077	0.00077235	MYH9/FLNA/HSPB1/ACTB	4
	GO:0042733	embryonic digit morphogenesis	0.000296163	0.00161899	0.000861905	HDAC2/HDAC1/CTNNB1/CREBBP	4
	GO:0032922	circadian regulation of gene expression	0.000315322	0.00170667	0.000908582	HNRNPU/HDAC2/HDAC1/HUWE1	4
	GO:0045453	bone resorption	0.000315322	0.00170667	0.000908582	TRAF6/SRC/CTNNB1/EGFR	4
	GO:0048857	neural nucleus development	0.000315322	0.00170667	0.000908582	HSPA5/YWHAE/ACTB/YWHAQ	4
	GO:0060135	maternal process involved in female pregnancy	0.00035628	0.00190272	0.00101296	AKT1/ESR1/AR/MAPK1	4
	GO:0031060	regulation of histone methylation	0.000378125	0.00197958	0.00105387	EED/CTNNB1/SNW1/BRCA1	4
	GO:0045428	regulation of nitric oxide biosynthetic process	0.000400911	0.00208228	0.00110855	AKT1/HSP90AA1/HSP90AB1/SMAD3	4
	GO:0042108	positive regulation of cytokine biosynthetic process	0.000424662	0.00217057	0.00115555	APP/TRAF6/HSPB1/RELA	4
	GO:0051298	centrosome duplication	0.000424662	0.00217057	0.00115555	CDK2/NPM1/XPO1/BRCA1	4
	GO:0035924	cellular response to vascular endothelial growth factor stimulus	0.0004494	0.00226817	0.00120751	AKT1/HSPB1/RELA/VCAM1	4
	GO:0008088	axo-dendritic transport	0.00047515	0.00236472	0.00125891	APP/HNRNPU/HSPB1/HSPA8	4
	GO:2000243	positive regulation of reproductive process	0.00047515	0.00236472	0.00125891	HDAC2/AR/SRC/CTNNB1	4
	GO:0001756	somitogenesis	0.000501934	0.00248647	0.00132373	TP53/EP300/SMAD3/PRKDC	4
	GO:0060395	SMAD protein signal transduction	0.000501934	0.00248647	0.00132373	PARP1/JUN/SMAD2/SMAD3	4
	GO:0006305	DNA alkylation	0.000558698	0.00273397	0.00145549	MYC/PARP1/EZH2/BRCA1	4
	GO:0006306	DNA methylation	0.000558698	0.00273397	0.00145549	MYC/PARP1/EZH2/BRCA1	4
	GO:0051881	regulation of mitochondrial membrane potential	0.000558698	0.00273397	0.00145549	AKT1/PARP1/SRC/VCP	4
	GO:0031100	animal organ regeneration	0.000588726	0.00285915	0.00152213	CDK1/PCNA/EZH2/EGFR	4
	GO:1903201	regulation of oxidative stress-induced cell death	0.000652192	0.00314834	0.00167609	AKT1/PARP1/HSPB1/CTNNB1	4
	GO:0006809	nitric oxide biosynthetic process	0.000720362	0.00341085	0.00181584	AKT1/HSP90AA1/HSP90AB1/SMAD3	4
	GO:2000779	regulation of double-strand break repair	0.000720362	0.00341085	0.00181584	RPA2/PARP1/FUS/PRKDC	4
	GO:0021675	nerve development	0.000793427	0.00368091	0.00195961	NTRK1/ITGA4/CTNNB1/VCAM1	4
	GO:1903312	negative regulation of mRNA metabolic process	0.000793427	0.00368091	0.00195961	HNRNPU/HNRNPK/U2AF2/TARDBP	4
	GO:0033045	regulation of sister chromatid segregation	0.000831854	0.00382606	0.00203689	HNRNPU/CUL3/RB1/CTNNB1	4
	GO:0034109	homotypic cell-cell adhesion	0.000871577	0.00398029	0.002119	MYH9/FLNA/HSPB1/ACTB	4
	GO:0016925	protein sumoylation	0.000912619	0.00411371	0.00219003	RELA/CTNNB1/UBE2I/MDM2	4
	GO:0046209	nitric oxide metabolic process	0.000912619	0.00411371	0.00219003	AKT1/HSP90AA1/HSP90AB1/SMAD3	4
	GO:0006970	response to osmotic stress	0.000955005	0.00424525	0.00226005	TP53/XRCC6/HSP90AB1/EGFR	4
	GO:2001057	reactive nitrogen species metabolic process	0.0010439	0.00457334	0.00243472	AKT1/HSP90AA1/HSP90AB1/SMAD3	4
	GO:0042058	regulation of epidermal growth factor receptor signaling pathway	0.00109046	0.00476983	0.00253933	APP/GRB2/AKT1/EGFR	4
	GO:0001892	embryonic placenta development	0.00113846	0.00490635	0.00261201	GRB2/AKT1/EGFR/MAPK1	4
	GO:0045844	positive regulation of striated muscle tissue development	0.00113846	0.00490635	0.00261201	CDK1/ARRB2/CTNNB1/MAPK1	4
	GO:0048636	positive regulation of muscle organ development	0.00113846	0.00490635	0.00261201	CDK1/ARRB2/CTNNB1/MAPK1	4
	GO:0043044	ATP-dependent chromatin remodeling	0.00118792	0.00505123	0.00268914	HDAC2/HDAC1/NPM1/ACTB	4
	GO:1900407	regulation of cellular response to oxidative stress	0.00118792	0.00505123	0.00268914	AKT1/PARP1/HSPB1/CTNNB1	4
	GO:1901863	positive regulation of muscle tissue development	0.00118792	0.00505123	0.00268914	CDK1/ARRB2/CTNNB1/MAPK1	4
	GO:0061053	somite development	0.00123886	0.00518623	0.00276101	TP53/EP300/SMAD3/PRKDC	4
	GO:0032651	regulation of interleukin-1 beta production	0.00129132	0.00537075	0.00285924	APP/ARRB2/HSPB1/SMAD3	4
	GO:0042475	odontogenesis of dentin-containing tooth	0.00129132	0.00537075	0.00285924	TRAF6/HDAC2/HDAC1/CTNNB1	4
	GO:0046849	bone remodeling	0.00129132	0.00537075	0.00285924	TRAF6/SRC/CTNNB1/EGFR	4
	GO:0060333	interferon-gamma-mediated signaling pathway	0.00134531	0.00557367	0.00296727	CDC37/TP53/HSP90AB1/VCAM1	4
	GO:0033273	response to vitamin	0.00145799	0.00587398	0.00312715	RELA/EGFR/SNW1/MDM2	4
	GO:0036473	cell death in response to oxidative stress	0.00145799	0.00587398	0.00312715	AKT1/PARP1/HSPB1/CTNNB1	4
	GO:1901184	regulation of ERBB signaling pathway	0.00145799	0.00587398	0.00312715	APP/GRB2/AKT1/EGFR	4
	GO:0044728	DNA methylation or demethylation	0.00151673	0.00604997	0.00322084	MYC/PARP1/EZH2/BRCA1	4
	GO:1901216	positive regulation of neuron death	0.00151673	0.00604997	0.00322084	TP53/PARP1/JUN/CTNNB1	4
	GO:2000060	positive regulation of ubiquitin-dependent protein catabolic process	0.00157709	0.00626743	0.00333661	AKT1/SMURF1/VCP/MDM2	4
	GO:0008585	female gonad development	0.00163911	0.00648025	0.00344991	ARRB2/ESR1/HSPA5/SRC	4
	GO:2001169	regulation of ATP biosynthetic process	0.00163911	0.00648025	0.00344991	APP/TP53/PARP1/VCP	4
	GO:0001657	ureteric bud development	0.00170281	0.00666812	0.00354993	MYC/SMAD2/CTNNB1/SMAD3	4
	GO:0051591	response to cAMP	0.00170281	0.00666812	0.00354993	APP/JUN/HSPA5/RELA	4
	GO:1902882	regulation of response to oxidative stress	0.00170281	0.00666812	0.00354993	AKT1/PARP1/HSPB1/CTNNB1	4
	GO:0072163	mesonephric epithelium development	0.0017682	0.00683266	0.00363752	MYC/SMAD2/CTNNB1/SMAD3	4
	GO:0072164	mesonephric tubule development	0.0017682	0.00683266	0.00363752	MYC/SMAD2/CTNNB1/SMAD3	4
	GO:0034446	substrate adhesion-dependent cell spreading	0.00190419	0.0073317	0.0039032	FN1/FLNA/ITGA4/SRC	4
	GO:0032611	interleukin-1 beta production	0.00197483	0.0075318	0.00400972	APP/ARRB2/HSPB1/SMAD3	4
	GO:0046545	development of primary female sexual characteristics	0.00197483	0.0075318	0.00400972	ARRB2/ESR1/HSPA5/SRC	4
	GO:1903426	regulation of reactive oxygen species biosynthetic process	0.00197483	0.0075318	0.00400972	AKT1/HSP90AA1/HSP90AB1/SMAD3	4
	GO:0001823	mesonephros development	0.00204726	0.00771216	0.00410575	MYC/SMAD2/CTNNB1/SMAD3	4
	GO:0051983	regulation of chromosome segregation	0.00212151	0.00794021	0.00422715	HNRNPU/CUL3/RB1/CTNNB1	4
	GO:0003300	cardiac muscle hypertrophy	0.00235539	0.0087217	0.0046432	PARP1/HDAC2/EZH2/SMAD3	4
	GO:0007052	mitotic spindle organization	0.00235539	0.0087217	0.0046432	HNRNPU/FLNA/VCP/CLTC	4
	GO:0042136	neurotransmitter biosynthetic process	0.00235539	0.0087217	0.0046432	AKT1/HSP90AA1/HSP90AB1/SMAD3	4
	GO:0048524	positive regulation of viral process	0.00243713	0.00889373	0.00473478	STAU1/JUN/EP300/SNW1	4
	GO:0046916	cellular transition metal ion homeostasis	0.00252081	0.00916789	0.00488073	CAND1/APP/MYC/CUL1	4
	GO:0014897	striated muscle hypertrophy	0.00260645	0.00942601	0.00501815	PARP1/HDAC2/EZH2/SMAD3	4
	GO:0014896	muscle hypertrophy	0.00278367	0.00991086	0.00527627	PARP1/HDAC2/EZH2/SMAD3	4
	GO:0008543	fibroblast growth factor receptor signaling pathway	0.00306474	0.0107802	0.0057391	GRB2/HNRNPA1/CTNNB1/MAPK1	4
	GO:0042035	regulation of cytokine biosynthetic process	0.00306474	0.0107802	0.0057391	APP/TRAF6/HSPB1/RELA	4
	GO:0046660	female sex differentiation	0.00316257	0.0110343	0.00587434	ARRB2/ESR1/HSPA5/SRC	4
	GO:0006304	DNA modification	0.00326252	0.0112906	0.00601083	MYC/PARP1/EZH2/BRCA1	4
	GO:0007569	cell aging	0.00326252	0.0112906	0.00601083	TP53/CDK1/NPM1/PRKDC	4
	GO:0021987	cerebral cortex development	0.00326252	0.0112906	0.00601083	FLNA/YWHAE/CTNNB1/EGFR	4
	GO:0010906	regulation of glucose metabolic process	0.00336461	0.0115322	0.00613943	TP53/AKT1/EP300/SRC	4
	GO:1900371	regulation of purine nucleotide biosynthetic process	0.00336461	0.0115322	0.00613943	APP/TP53/PARP1/VCP	4
	GO:0030808	regulation of nucleotide biosynthetic process	0.00346884	0.0118768	0.0063229	APP/TP53/PARP1/VCP	4
	GO:1903052	positive regulation of proteolysis involved in cellular protein catabolic process	0.00368388	0.0123803	0.00659091	AKT1/SMURF1/VCP/MDM2	4
	GO:0032434	regulation of proteasomal ubiquitin-dependent protein catabolic process	0.00390779	0.0130259	0.00693463	AKT1/HSP90AB1/VCP/MDM2	4
	GO:1903409	reactive oxygen species biosynthetic process	0.00390779	0.0130259	0.00693463	AKT1/HSP90AA1/HSP90AB1/SMAD3	4
	GO:0042089	cytokine biosynthetic process	0.00402313	0.0132389	0.00704801	APP/TRAF6/HSPB1/RELA	4
	GO:0014066	regulation of phosphatidylinositol 3-kinase signaling	0.00414075	0.0135704	0.00722449	NTRK1/SRC/EGFR/MAPK1	4
	GO:0042107	cytokine metabolic process	0.00414075	0.0135704	0.00722449	APP/TRAF6/HSPB1/RELA	4
	GO:0030326	embryonic limb morphogenesis	0.00426068	0.0138645	0.00738107	HDAC2/HDAC1/CTNNB1/CREBBP	4
	GO:0035113	embryonic appendage morphogenesis	0.00426068	0.0138645	0.00738107	HDAC2/HDAC1/CTNNB1/CREBBP	4
	GO:0018107	peptidyl-threonine phosphorylation	0.00438294	0.0141178	0.00751593	APP/AKT1/CDK1/MAPK1	4
	GO:0035270	endocrine system development	0.00450754	0.014391	0.00766139	AKT1/SMAD2/SMAD3/MAPK1	4
	GO:0055076	transition metal ion homeostasis	0.00502984	0.0157611	0.00839081	CAND1/APP/MYC/CUL1	4
	GO:1902850	microtubule cytoskeleton organization involved in mitosis	0.00502984	0.0157611	0.00839081	HNRNPU/FLNA/VCP/CLTC	4
	GO:0055007	cardiac muscle cell differentiation	0.00516649	0.0161421	0.00859363	HNRNPU/CDK1/ARRB2/OBSL1	4
	GO:0018210	peptidyl-threonine modification	0.0054472	0.0168069	0.00894752	APP/AKT1/CDK1/MAPK1	4
	GO:0046683	response to organophosphorus	0.0054472	0.0168069	0.00894752	APP/JUN/HSPA5/RELA	4
	GO:0006405	RNA export from nucleus	0.00559131	0.017202	0.00915787	HNRNPA1/U2AF2/NPM1/XPO1	4
	GO:0008584	male gonad development	0.00603889	0.0182988	0.00974179	FLNA/NTRK1/ESR1/AR	4
	GO:0046546	development of primary male sexual characteristics	0.00619323	0.0187136	0.00996259	FLNA/NTRK1/ESR1/AR	4
	GO:0072073	kidney epithelium development	0.00635017	0.0191159	0.0101768	MYC/SMAD2/CTNNB1/SMAD3	4
	GO:0008286	insulin receptor signaling pathway	0.00650974	0.0193785	0.0103166	GRB2/AKT1/RELA/SRC	4
	GO:0010675	regulation of cellular carbohydrate metabolic process	0.00667194	0.0198247	0.0105541	TP53/AKT1/EP300/SRC	4
	GO:0071901	negative regulation of protein serine/threonine kinase activity	0.0071746	0.0210651	0.0112145	AKT1/HSPB1/YWHAG/RB1	4
	GO:0035264	multicellular organism growth	0.00734756	0.0214944	0.0114431	APP/TP53/AR/EP300	4
	GO:0043524	negative regulation of neuron apoptotic process	0.00752325	0.0218663	0.011641	NTRK1/JUN/ARRB2/HSP90AB1	4
	GO:0090263	positive regulation of canonical Wnt signaling pathway	0.00752325	0.0218663	0.011641	SRC/SMAD3/VCP/EGFR	4
	GO:0035107	appendage morphogenesis	0.00770168	0.0221673	0.0118013	HDAC2/HDAC1/CTNNB1/CREBBP	4
	GO:0035108	limb morphogenesis	0.00770168	0.0221673	0.0118013	HDAC2/HDAC1/CTNNB1/CREBBP	4
	GO:0051592	response to calcium ion	0.00770168	0.0221673	0.0118013	FUS/JUN/HSPA5/EGFR	4
	GO:0050773	regulation of dendrite development	0.00788289	0.0225878	0.0120251	HDAC2/EZH2/OBSL1/CUL7	4
	GO:0035567	non-canonical Wnt signaling pathway	0.00806688	0.0230125	0.0122512	ARRB2/SMURF1/CTNNB1/CLTC	4
	GO:0042133	neurotransmitter metabolic process	0.00863574	0.0244186	0.0129998	AKT1/HSP90AA1/HSP90AB1/SMAD3	4
	GO:0051017	actin filament bundle assembly	0.00863574	0.0244186	0.0129998	FLNA/CUL3/SRC/SMAD3	4
	GO:0010770	positive regulation of cell morphogenesis involved in differentiation	0.00883104	0.0248251	0.0132162	FN1/FLNA/OBSL1/CUL7	4
	GO:0060968	regulation of gene silencing	0.00902921	0.0252645	0.0134501	CDK2/TP53/ESR1/EGFR	4
	GO:0061572	actin filament bundle organization	0.00943422	0.0260576	0.0138724	FLNA/CUL3/SRC/SMAD3	4
	GO:0006754	ATP biosynthetic process	0.0100637	0.0276508	0.0147205	APP/TP53/PARP1/VCP	4
	GO:0032680	regulation of tumor necrosis factor production	0.0100637	0.0276508	0.0147205	APP/HDAC2/ARRB2/HSPB1	4
	GO:0010970	transport along microtubule	0.0102794	0.0280783	0.0149481	APP/HNRNPU/HSPB1/HSPA8	4
	GO:0099111	microtubule-based transport	0.0102794	0.0280783	0.0149481	APP/HNRNPU/HSPB1/HSPA8	4
	GO:0032640	tumor necrosis factor production	0.0107198	0.0290836	0.0154833	APP/HDAC2/ARRB2/HSPB1	4
	GO:1903555	regulation of tumor necrosis factor superfamily cytokine production	0.0107198	0.0290836	0.0154833	APP/HDAC2/ARRB2/HSPB1	4
	GO:0071706	tumor necrosis factor superfamily cytokine production	0.0118737	0.0314966	0.0167679	APP/HDAC2/ARRB2/HSPB1	4
	GO:0018394	peptidyl-lysine acetylation	0.0121137	0.0319935	0.0170325	HDAC2/EP300/BRCA1/CREBBP	4
	GO:0030307	positive regulation of cell growth	0.0121137	0.0319935	0.0170325	FN1/AKT1/SMURF1/EGFR	4
	GO:0009206	purine ribonucleoside triphosphate biosynthetic process	0.0126029	0.0329685	0.0175516	APP/TP53/PARP1/VCP	4
	GO:0010634	positive regulation of epithelial cell migration	0.0126029	0.0329685	0.0175516	AKT1/JUN/HSPB1/SRC	4
	GO:0009145	purine nucleoside triphosphate biosynthetic process	0.0128522	0.0334515	0.0178087	APP/TP53/PARP1/VCP	4
	GO:0001959	regulation of cytokine-mediated signaling pathway	0.014146	0.0358953	0.0191097	CDC37/HSP90AB1/IKBKG/IKBKE	4
	GO:0009201	ribonucleoside triphosphate biosynthetic process	0.014146	0.0358953	0.0191097	APP/TP53/PARP1/VCP	4
	GO:0030177	positive regulation of Wnt signaling pathway	0.0146858	0.0368291	0.0196068	SRC/SMAD3/VCP/EGFR	4
	GO:0048736	appendage development	0.0146858	0.0368291	0.0196068	HDAC2/HDAC1/CTNNB1/CREBBP	4
	GO:0060173	limb development	0.0146858	0.0368291	0.0196068	HDAC2/HDAC1/CTNNB1/CREBBP	4
	GO:0043534	blood vessel endothelial cell migration	0.0149606	0.0373433	0.0198806	MYH9/AKT1/HDAC5/HSPB1	4
	GO:0071346	cellular response to interferon-gamma	0.0149606	0.0373433	0.0198806	CDC37/TP53/HSP90AB1/VCAM1	4
	GO:0071466	cellular response to xenobiotic stimulus	0.0149606	0.0373433	0.0198806	PCNA/HSP90AB1/RB1/EGFR	4
	GO:0051147	regulation of muscle cell differentiation	0.0152385	0.0379258	0.0201907	HDAC5/EZH2/ARRB2/CTNNB1	4
	GO:0009127	purine nucleoside monophosphate biosynthetic process	0.0158043	0.0389056	0.0207123	APP/TP53/PARP1/VCP	4
	GO:0009168	purine ribonucleoside monophosphate biosynthetic process	0.0158043	0.0389056	0.0207123	APP/TP53/PARP1/VCP	4
	GO:0061136	regulation of proteasomal protein catabolic process	0.0158043	0.0389056	0.0207123	AKT1/HSP90AB1/VCP/MDM2	4
	GO:0042098	T cell proliferation	0.016092	0.0393805	0.0209651	TRAF6/TP53/CTNNB1/VCAM1	4
	GO:0048167	regulation of synaptic plasticity	0.016975	0.0411264	0.0218946	APP/STAU1/YWHAG/MAPK1	4
	GO:0009142	nucleoside triphosphate biosynthetic process	0.017276	0.0417611	0.0222325	APP/TP53/PARP1/VCP	4
	GO:0000819	sister chromatid segregation	0.0175803	0.042401	0.0225732	HNRNPU/CUL3/RB1/CTNNB1	4
	GO:0060759	regulation of response to cytokine stimulus	0.0178879	0.0428856	0.0228311	CDC37/HSP90AB1/IKBKG/IKBKE	4
	GO:0007565	female pregnancy	0.0185132	0.0442855	0.0235764	AKT1/ESR1/AR/MAPK1	4
	GO:0050731	positive regulation of peptidyl-tyrosine phosphorylation	0.0185132	0.0442855	0.0235764	TP53/HDAC2/ARRB2/SRC	4
	GO:0009156	ribonucleoside monophosphate biosynthetic process	0.0201354	0.0474947	0.0252849	APP/TP53/PARP1/VCP	4
	GO:0034341	response to interferon-gamma	0.0208081	0.0486531	0.0259016	CDC37/TP53/HSP90AB1/VCAM1	4
	GO:0007440	foregut morphogenesis	1.64e-05	0.000148396	7.9e-05	SMAD2/CTNNB1/SMAD3	3
	GO:0032070	regulation of deoxyribonuclease activity	1.64e-05	0.000148396	7.9e-05	AKT1/PCNA/NPM1	3
	GO:0045899	positive regulation of RNA polymerase II transcriptional preinitiation complex assembly	2.24e-05	0.000191914	0.00010217	CAND1/TP53/ESR1	3
	GO:0070933	histone H4 deacetylation	2.24e-05	0.000191914	0.00010217	HDAC2/HDAC1/SIRT7	3
	GO:0043922	negative regulation by host of viral transcription	2.98e-05	0.000245759	0.000130836	HDAC1/JUN/TARDBP	3
	GO:0060788	ectodermal placode formation	2.98e-05	0.000245759	0.000130836	HDAC2/HDAC1/CTNNB1	3
	GO:0071697	ectodermal placode morphogenesis	2.98e-05	0.000245759	0.000130836	HDAC2/HDAC1/CTNNB1	3
	GO:0007183	SMAD protein complex assembly	3.86e-05	0.000301275	0.000160391	PARP1/SMAD2/SMAD3	3
	GO:0010870	positive regulation of receptor biosynthetic process	3.86e-05	0.000301275	0.000160391	HNRNPK/HDAC2/HDAC1	3
	GO:0071696	ectodermal placode development	3.86e-05	0.000301275	0.000160391	HDAC2/HDAC1/CTNNB1	3
	GO:1902947	regulation of tau-protein kinase activity	3.86e-05	0.000301275	0.000160391	HSP90AA1/HSP90AB1/RB1	3
	GO:0048308	organelle inheritance	4.9e-05	0.000363455	0.000193494	CDK1/YWHAZ/MAPK1	3
	GO:0048313	Golgi inheritance	4.9e-05	0.000363455	0.000193494	CDK1/YWHAZ/MAPK1	3
	GO:0035635	entry of bacterium into host cell	6.1e-05	0.000439397	0.000233923	GRB2/SRC/CTNNB1	3
	GO:0045898	regulation of RNA polymerase II transcriptional preinitiation complex assembly	6.1e-05	0.000439397	0.000233923	CAND1/TP53/ESR1	3
	GO:0051571	positive regulation of histone H3-K4 methylation	7.47e-05	0.000526923	0.000280519	CTNNB1/SNW1/BRCA1	3
	GO:0061684	chaperone-mediated autophagy	7.47e-05	0.000526923	0.000280519	EEF1A1/HSP90AA1/HSPA8	3
	GO:0035518	histone H2A monoubiquitination	9.04e-05	0.000608063	0.000323716	RNF2/CUL4B/BMI1	3
	GO:0043923	positive regulation by host of viral transcription	9.04e-05	0.000608063	0.000323716	JUN/EP300/SNW1	3
	GO:0062033	positive regulation of mitotic sister chromatid segregation	9.04e-05	0.000608063	0.000323716	HNRNPU/CUL3/RB1	3
	GO:1901524	regulation of mitophagy	9.04e-05	0.000608063	0.000323716	CDC37/TP53/SMURF1	3
	GO:1904996	positive regulation of leukocyte adhesion to vascular endothelial cell	9.04e-05	0.000608063	0.000323716	TRAF6/ITGA4/RELA	3
	GO:0007221	positive regulation of transcription of Notch receptor target	0.000108074	0.000697706	0.00037144	EP300/SNW1/CREBBP	3
	GO:0051131	chaperone-mediated protein complex assembly	0.00012785	0.00080124	0.000426559	HSP90AA1/HSP90AB1/HSPA4	3
	GO:1903798	regulation of production of miRNAs involved in gene silencing by miRNA	0.00012785	0.00080124	0.000426559	TP53/ESR1/EGFR	3
	GO:0023019	signal transduction involved in regulation of gene expression	0.000149839	0.000914594	0.000486905	PARP1/SMAD2/SMAD3	3
	GO:0032211	negative regulation of telomere maintenance via telomerase	0.000149839	0.000914594	0.000486905	HNRNPU/HNRNPA1/SRC	3
	GO:0060261	positive regulation of transcription initiation from RNA polymerase II promoter	0.000149839	0.000914594	0.000486905	CAND1/TP53/ESR1	3
	GO:0046827	positive regulation of protein export from nucleus	0.000174147	0.00103682	0.000551976	TP53/YWHAE/MDM2	3
	GO:0070734	histone H3-K27 methylation	0.000174147	0.00103682	0.000551976	SUZ12/EED/EZH2	3
	GO:0070920	regulation of production of small RNA involved in gene silencing by RNA	0.000174147	0.00103682	0.000551976	TP53/ESR1/EGFR	3
	GO:0000423	mitophagy	0.000200878	0.00116574	0.00062061	CDC37/TP53/SMURF1	3
	GO:0010869	regulation of receptor biosynthetic process	0.000200878	0.00116574	0.00062061	HNRNPK/HDAC2/HDAC1	3
	GO:0032069	regulation of nuclease activity	0.000200878	0.00116574	0.00062061	AKT1/PCNA/NPM1	3
	GO:0033233	regulation of protein sumoylation	0.000200878	0.00116574	0.00062061	RELA/CTNNB1/UBE2I	3
	GO:1901522	positive regulation of transcription from RNA polymerase II promoter involved in cellular response to chemical stimulus	0.000200878	0.00116574	0.00062061	TP53/EP300/RELA	3
	GO:0032897	negative regulation of viral transcription	0.000262008	0.00145484	0.000774519	HDAC1/JUN/TARDBP	3
	GO:0044346	fibroblast apoptotic process	0.000262008	0.00145484	0.000774519	MYC/TP53/CUL3	3
	GO:0033522	histone H2A ubiquitination	0.000296605	0.00161899	0.000861905	RNF2/CUL4B/BMI1	3
	GO:0060444	branching involved in mammary gland duct morphogenesis	0.000296605	0.00161899	0.000861905	ESR1/AR/SRC	3
	GO:0060571	morphogenesis of an epithelial fold	0.000296605	0.00161899	0.000861905	AR/CTNNB1/EGFR	3
	GO:0032800	receptor biosynthetic process	0.000334018	0.00179878	0.00095762	HNRNPK/HDAC2/HDAC1	3
	GO:0009651	response to salt stress	0.000374344	0.00196794	0.00104768	TP53/XRCC6/HSP90AB1	3
	GO:0051569	regulation of histone H3-K4 methylation	0.000374344	0.00196794	0.00104768	CTNNB1/SNW1/BRCA1	3
	GO:0060384	innervation	0.000374344	0.00196794	0.00104768	NTRK1/ITGA4/VCAM1	3
	GO:1902175	regulation of oxidative stress-induced intrinsic apoptotic signaling pathway	0.000374344	0.00196794	0.00104768	AKT1/PARP1/HSPB1	3
	GO:0051123	RNA polymerase II preinitiation complex assembly	0.000417673	0.00214564	0.00114228	CAND1/TP53/ESR1	3
	GO:0051984	positive regulation of chromosome segregation	0.000417673	0.00214564	0.00114228	HNRNPU/CUL3/RB1	3
	GO:0060260	regulation of transcription initiation from RNA polymerase II promoter	0.000417673	0.00214564	0.00114228	CAND1/TP53/ESR1	3
	GO:0071168	protein localization to chromatin	0.000417673	0.00214564	0.00114228	EZH2/ESR1/RB1	3
	GO:1904994	regulation of leukocyte adhesion to vascular endothelial cell	0.000417673	0.00214564	0.00114228	TRAF6/ITGA4/RELA	3
	GO:0010390	histone monoubiquitination	0.000464097	0.0023241	0.00123729	RNF2/CUL4B/BMI1	3
	GO:0044030	regulation of DNA methylation	0.000464097	0.0023241	0.00123729	MYC/PARP1/BRCA1	3
	GO:0060765	regulation of androgen receptor signaling pathway	0.000464097	0.0023241	0.00123729	HDAC1/ARRB2/EP300	3
	GO:0097421	liver regeneration	0.000513706	0.00253308	0.00134854	PCNA/EZH2/EGFR	3
	GO:1902751	positive regulation of cell cycle G2/M phase transition	0.000513706	0.00253308	0.00134854	APP/CDK1/NPM1	3
	GO:0045737	positive regulation of cyclin-dependent protein serine/threonine kinase activity	0.000566588	0.00275997	0.00146933	AKT1/SRC/EGFR	3
	GO:1902253	regulation of intrinsic apoptotic signaling pathway by p53 class mediator	0.000566588	0.00275997	0.00146933	TP53/HNRNPK/MDM2	3
	GO:2000781	positive regulation of double-strand break repair	0.000566588	0.00275997	0.00146933	PARP1/FUS/PRKDC	3
	GO:0071353	cellular response to interleukin-4	0.000622829	0.0030202	0.00160787	HSP90AB1/HSPA5/MCM2	3
	GO:0048011	neurotrophin TRK receptor signaling pathway	0.000682513	0.00327504	0.00174354	GRB2/NTRK1/SRC	3
	GO:0060603	mammary gland duct morphogenesis	0.000682513	0.00327504	0.00174354	ESR1/AR/SRC	3
	GO:0032212	positive regulation of telomere maintenance via telomerase	0.000745724	0.0034949	0.00186059	HNRNPA1/CTNNB1/MAPK1	3
	GO:0043276	anoikis	0.000745724	0.0034949	0.00186059	AKT1/IKBKG/SRC	3
	GO:0070670	response to interleukin-4	0.000745724	0.0034949	0.00186059	HSP90AB1/HSPA5/MCM2	3
	GO:0071868	cellular response to monoamine stimulus	0.000745724	0.0034949	0.00186059	APP/HDAC2/MAPK1	3
	GO:0071870	cellular response to catecholamine stimulus	0.000745724	0.0034949	0.00186059	APP/HDAC2/MAPK1	3
	GO:0060338	regulation of type I interferon-mediated signaling pathway	0.000812544	0.00375334	0.00199818	CDC37/HSP90AB1/IKBKE	3
	GO:0002755	MyD88-dependent toll-like receptor signaling pathway	0.000883051	0.0040099	0.00213476	TRAF6/RPS27A/UBC	3
	GO:0030224	monocyte differentiation	0.000883051	0.0040099	0.00213476	MYH9/MYC/JUN	3
	GO:1903131	mononuclear cell differentiation	0.000883051	0.0040099	0.00213476	MYH9/MYC/JUN	3
	GO:0007099	centriole replication	0.000957326	0.00424525	0.00226005	CDK2/NPM1/BRCA1	3
	GO:0014037	Schwann cell differentiation	0.000957326	0.00424525	0.00226005	AKT1/CDK1/RELA	3
	GO:0038083	peptidyl-tyrosine autophosphorylation	0.000957326	0.00424525	0.00226005	NTRK1/SRC/EGFR	3
	GO:1904358	positive regulation of telomere maintenance via telomere lengthening	0.000957326	0.00424525	0.00226005	HNRNPA1/CTNNB1/MAPK1	3
	GO:0071867	response to monoamine	0.00103545	0.00454775	0.0024211	APP/HDAC2/MAPK1	3
	GO:0071869	response to catecholamine	0.00103545	0.00454775	0.0024211	APP/HDAC2/MAPK1	3
	GO:0038179	neurotrophin signaling pathway	0.00111748	0.00485501	0.00258468	GRB2/NTRK1/SRC	3
	GO:0048713	regulation of oligodendrocyte differentiation	0.00111748	0.00485501	0.00258468	HDAC2/HDAC1/CTNNB1	3
	GO:0072595	maintenance of protein localization in organelle	0.00111748	0.00485501	0.00258468	HNRNPU/AKT1/HSPA5	3
	GO:0042026	protein refolding	0.00120351	0.00506453	0.00269622	HSP90AA1/HSPA5/HSPA8	3
	GO:0098534	centriole assembly	0.00120351	0.00506453	0.00269622	CDK2/NPM1/BRCA1	3
	GO:2000008	regulation of protein localization to cell surface	0.00120351	0.00506453	0.00269622	AKT1/HSP90AB1/CTNNB1	3
	GO:0050434	positive regulation of viral transcription	0.00129361	0.00537334	0.00286062	JUN/EP300/SNW1	3
	GO:0042149	cellular response to glucose starvation	0.00138785	0.0056964	0.00303261	TP53/HNRNPA1/HSPA5	3
	GO:1903146	regulation of autophagy of mitochondrion	0.00138785	0.0056964	0.00303261	CDC37/TP53/SMURF1	3
	GO:0008631	intrinsic apoptotic signaling pathway in response to oxidative stress	0.00148629	0.00594331	0.00316406	AKT1/PARP1/HSPB1	3
	GO:0010824	regulation of centrosome duplication	0.00148629	0.00594331	0.00316406	NPM1/XPO1/BRCA1	3
	GO:0032459	regulation of protein oligomerization	0.00148629	0.00594331	0.00316406	TP53/EP300/SRC	3
	GO:0045687	positive regulation of glial cell differentiation	0.00148629	0.00594331	0.00316406	HDAC2/HDAC1/RELA	3
	GO:0071364	cellular response to epidermal growth factor stimulus	0.00148629	0.00594331	0.00316406	AKT1/EEF1A1/EGFR	3
	GO:0030225	macrophage differentiation	0.00158901	0.00629921	0.00335353	APP/PARP1/RB1	3
	GO:0070897	transcription preinitiation complex assembly	0.00158901	0.00629921	0.00335353	CAND1/TP53/ESR1	3
	GO:0010569	regulation of double-strand break repair via homologous recombination	0.00169607	0.00666812	0.00354993	RPA2/PARP1/FUS	3
	GO:0035987	endodermal cell differentiation	0.00169607	0.00666812	0.00354993	FN1/ITGA4/CTNNB1	3
	GO:0048538	thymus development	0.00169607	0.00666812	0.00354993	CTNNB1/MAPK1/PRKDC	3
	GO:0060443	mammary gland morphogenesis	0.00180754	0.0069679	0.00370952	ESR1/AR/SRC	3
	GO:0060711	labyrinthine layer development	0.00180754	0.0069679	0.00370952	GRB2/AKT1/MAPK1	3
	GO:0048806	genitalia development	0.00192348	0.0073875	0.0039329	ESR1/AR/CTNNB1	3
	GO:1903580	positive regulation of ATP metabolic process	0.00192348	0.0073875	0.0039329	APP/CDK1/VCP	3
	GO:0030850	prostate gland development	0.00204395	0.00771216	0.00410575	ESR1/AR/CTNNB1	3
	GO:0045912	negative regulation of carbohydrate metabolic process	0.00204395	0.00771216	0.00410575	TP53/EP300/CLTC	3
	GO:0090199	regulation of release of cytochrome c from mitochondria	0.00204395	0.00771216	0.00410575	TP53/AKT1/ARRB2	3
	GO:0061912	selective autophagy	0.00216903	0.00809921	0.0043118	CDC37/TP53/SMURF1	3
	GO:0032206	positive regulation of telomere maintenance	0.0024332	0.00888948	0.00473252	HNRNPA1/CTNNB1/MAPK1	3
	GO:0050999	regulation of nitric-oxide synthase activity	0.0024332	0.00888948	0.00473252	AKT1/HSP90AA1/EGFR	3
	GO:0032330	regulation of chondrocyte differentiation	0.00257242	0.00933446	0.00496941	RELA/CTNNB1/SMAD3	3
	GO:0032731	positive regulation of interleukin-1 beta production	0.00257242	0.00933446	0.00496941	APP/HSPB1/SMAD3	3
	GO:0000186	activation of MAPKK activity	0.00271647	0.00976231	0.00519719	NTRK1/EGFR/MAPK1	3
	GO:0045840	positive regulation of mitotic nuclear division	0.00271647	0.00976231	0.00519719	HNRNPU/CUL3/RB1	3
	GO:0002763	positive regulation of myeloid leukocyte differentiation	0.0028654	0.0101569	0.00540724	TRAF6/JUN/RB1	3
	GO:0032655	regulation of interleukin-12 production	0.0028654	0.0101569	0.00540724	TRAF6/ARRB2/RELA	3
	GO:0045747	positive regulation of Notch signaling pathway	0.0028654	0.0101569	0.00540724	EP300/SNW1/CREBBP	3
	GO:0001541	ovarian follicle development	0.00301928	0.0106436	0.00566637	ARRB2/ESR1/SRC	3
	GO:0010823	negative regulation of mitochondrion organization	0.00301928	0.0106436	0.00566637	TP53/AKT1/ARRB2	3
	GO:0031295	T cell costimulation	0.00317814	0.0110343	0.00587434	GRB2/AKT1/SRC	3
	GO:0032615	interleukin-12 production	0.00317814	0.0110343	0.00587434	TRAF6/ARRB2/RELA	3
	GO:0051568	histone H3-K4 methylation	0.00317814	0.0110343	0.00587434	CTNNB1/SNW1/BRCA1	3
	GO:0060688	regulation of morphogenesis of a branching structure	0.00317814	0.0110343	0.00587434	ESR1/AR/CTNNB1	3
	GO:1903202	negative regulation of oxidative stress-induced cell death	0.00317814	0.0110343	0.00587434	AKT1/HSPB1/CTNNB1	3
	GO:0031294	lymphocyte costimulation	0.00334205	0.0114794	0.00611131	GRB2/AKT1/SRC	3
	GO:0043525	positive regulation of neuron apoptotic process	0.00334205	0.0114794	0.00611131	TP53/JUN/CTNNB1	3
	GO:0045981	positive regulation of nucleotide metabolic process	0.00334205	0.0114794	0.00611131	APP/CDK1/VCP	3
	GO:0075733	intracellular transport of virus	0.00334205	0.0114794	0.00611131	RPS27A/UBC/XPO1	3
	GO:1900408	negative regulation of cellular response to oxidative stress	0.00334205	0.0114794	0.00611131	AKT1/HSPB1/CTNNB1	3
	GO:1900544	positive regulation of purine nucleotide metabolic process	0.00334205	0.0114794	0.00611131	APP/CDK1/VCP	3
	GO:0031663	lipopolysaccharide-mediated signaling pathway	0.00351105	0.0119114	0.00634129	TRAF6/AKT1/MAPK1	3
	GO:0035306	positive regulation of dephosphorylation	0.00351105	0.0119114	0.00634129	HSP90AB1/SRC/SMAD3	3
	GO:0061900	glial cell activation	0.00351105	0.0119114	0.00634129	APP/JUN/EGFR	3
	GO:0033619	membrane protein proteolysis	0.00368519	0.0123803	0.00659091	MYH9/TRAF6/RELA	3
	GO:0061077	chaperone-mediated protein folding	0.00368519	0.0123803	0.00659091	HSPB1/HSPA5/HSPA8	3
	GO:1902883	negative regulation of response to oxidative stress	0.00368519	0.0123803	0.00659091	AKT1/HSPB1/CTNNB1	3
	GO:0046794	transport of virus	0.00386453	0.0129421	0.00689005	RPS27A/UBC/XPO1	3
	GO:0006879	cellular iron ion homeostasis	0.0040491	0.0132971	0.00707901	CAND1/MYC/CUL1	3
	GO:0048645	animal organ formation	0.0040491	0.0132971	0.00707901	AR/CTNNB1/MAPK1	3
	GO:0009880	embryonic pattern specification	0.00423895	0.0138639	0.00738077	SMAD2/CTNNB1/SMAD3	3
	GO:0055025	positive regulation of cardiac muscle tissue development	0.00423895	0.0138639	0.00738077	CDK1/ARRB2/MAPK1	3
	GO:0045815	positive regulation of gene expression, epigenetic	0.00443413	0.0141707	0.0075441	EP300/ACTB/CTNNB1	3
	GO:0046622	positive regulation of organ growth	0.00443413	0.0141707	0.0075441	AKT1/CDK1/MAPK1	3
	GO:2000401	regulation of lymphocyte migration	0.00443413	0.0141707	0.0075441	APP/AKT1/ITGA4	3
	GO:0032768	regulation of monooxygenase activity	0.00463468	0.0147676	0.00786187	AKT1/HSP90AA1/EGFR	3
	GO:0036498	IRE1-mediated unfolded protein response	0.00463468	0.0147676	0.00786187	HSPA5/CUL7/COPS5	3
	GO:0014823	response to activity	0.00484064	0.0153121	0.00815175	CDK1/HDAC5/PRKDC	3
	GO:0051785	positive regulation of nuclear division	0.00505206	0.0158	0.00841148	HNRNPU/CUL3/RB1	3
	GO:1904888	cranial skeletal system development	0.00505206	0.0158	0.00841148	SMAD2/CTNNB1/SMAD3	3
	GO:0016239	positive regulation of macroautophagy	0.00549141	0.0169108	0.00900286	CDC37/IKBKG/SMURF1	3
	GO:0033047	regulation of mitotic sister chromatid segregation	0.00549141	0.0169108	0.00900286	HNRNPU/CUL3/RB1	3
	GO:0051865	protein autoubiquitination	0.00571942	0.0175793	0.00935874	TRAF6/BRCA1/MDM2	3
	GO:0033077	T cell differentiation in thymus	0.00595304	0.0180557	0.00961236	TP53/CTNNB1/PRKDC	3
	GO:0061515	myeloid cell development	0.00595304	0.0180557	0.00961236	APP/EP300/SRC	3
	GO:0072091	regulation of stem cell proliferation	0.00595304	0.0180557	0.00961236	HNRNPU/TP53/CTNNB1	3
	GO:0051057	positive regulation of small GTPase mediated signal transduction	0.0061923	0.0187136	0.00996259	GRB2/NTRK1/SRC	3
	GO:0061035	regulation of cartilage development	0.00643724	0.0191805	0.0102112	RELA/CTNNB1/SMAD3	3
	GO:0044766	multi-organism transport	0.00668789	0.0198354	0.0105598	RPS27A/UBC/XPO1	3
	GO:1902579	multi-organism localization	0.00668789	0.0198354	0.0105598	RPS27A/UBC/XPO1	3
	GO:0014015	positive regulation of gliogenesis	0.00694429	0.0205013	0.0109143	HDAC2/HDAC1/RELA	3
	GO:0032507	maintenance of protein location in cell	0.00694429	0.0205013	0.0109143	HNRNPU/AKT1/HSPA5	3
	GO:1900006	positive regulation of dendrite development	0.00694429	0.0205013	0.0109143	EZH2/OBSL1/CUL7	3
	GO:0007422	peripheral nervous system development	0.00720646	0.0211201	0.0112438	AKT1/CDK1/RELA	3
	GO:0150076	neuroinflammatory response	0.00720646	0.0211201	0.0112438	APP/JUN/EGFR	3
	GO:0000422	autophagy of mitochondrion	0.00747444	0.0218061	0.011609	CDC37/TP53/SMURF1	3
	GO:0061726	mitochondrion disassembly	0.00747444	0.0218061	0.011609	CDC37/TP53/SMURF1	3
	GO:0031397	negative regulation of protein ubiquitination	0.00774825	0.0222615	0.0118514	AKT1/U2AF2/ARRB2	3
	GO:0048678	response to axon injury	0.00774825	0.0222615	0.0118514	CDK1/NTRK1/JUN	3
	GO:0030433	ubiquitin-dependent ERAD pathway	0.00802793	0.0229217	0.0122029	HSPA5/VCP/FBXO6	3
	GO:0031016	pancreas development	0.00802793	0.0229217	0.0122029	AKT1/SMAD2/CTNNB1	3
	GO:0055072	iron ion homeostasis	0.0083135	0.0235696	0.0125478	CAND1/MYC/CUL1	3
	GO:0021766	hippocampus development	0.00890243	0.0249315	0.0132728	HDAC1/EZH2/YWHAE	3
	GO:0032436	positive regulation of proteasomal ubiquitin-dependent protein catabolic process	0.00890243	0.0249315	0.0132728	AKT1/VCP/MDM2	3
	GO:0048708	astrocyte differentiation	0.00890243	0.0249315	0.0132728	APP/EGFR/MAPK1	3
	GO:0110110	positive regulation of animal organ morphogenesis	0.00890243	0.0249315	0.0132728	MYC/AR/CTNNB1	3
	GO:0045913	positive regulation of carbohydrate metabolic process	0.00951525	0.0262363	0.0139675	APP/AKT1/SRC	3
	GO:0071277	cellular response to calcium ion	0.00951525	0.0262363	0.0139675	FUS/JUN/HSPA5	3
	GO:0009798	axis specification	0.0101521	0.027778	0.0147883	RNF2/SMAD2/CTNNB1	3
	GO:0006303	double-strand break repair via nonhomologous end joining	0.0104797	0.0285044	0.0151749	XRCC6/PRKDC/BRCA1	3
	GO:0032760	positive regulation of tumor necrosis factor production	0.0104797	0.0285044	0.0151749	APP/HDAC2/HSPB1	3
	GO:0048013	ephrin receptor signaling pathway	0.0104797	0.0285044	0.0151749	NTRK1/ACTB/SRC	3
	GO:0060291	long-term synaptic potentiation	0.0104797	0.0285044	0.0151749	APP/STAU1/MAPK1	3
	GO:0034103	regulation of tissue remodeling	0.011153	0.0300058	0.0159743	TP53/SRC/EGFR	3
	GO:1903557	positive regulation of tumor necrosis factor superfamily cytokine production	0.011153	0.0300058	0.0159743	APP/HDAC2/HSPB1	3
	GO:2000177	regulation of neural precursor cell proliferation	0.011153	0.0300058	0.0159743	TP53/FLNA/CTNNB1	3
	GO:0055013	cardiac muscle cell development	0.0114989	0.030578	0.0162789	HNRNPU/CDK1/OBSL1	3
	GO:0097306	cellular response to alcohol	0.0114989	0.030578	0.0162789	AKT1/CTNNB1/BRCA1	3
	GO:0034333	adherens junction assembly	0.0118508	0.031462	0.0167495	SRC/CTNNB1/SMAD3	3
	GO:0045639	positive regulation of myeloid cell differentiation	0.012209	0.0319935	0.0170325	TRAF6/JUN/RB1	3
	GO:0051899	membrane depolarization	0.012209	0.0319935	0.0170325	PARP1/JUN/SRC	3
	GO:0010972	negative regulation of G2/M transition of mitotic cell cycle	0.0129438	0.0334515	0.0178087	CDK1/CUL1/BRCA1	3
	GO:0032092	positive regulation of protein binding	0.0129438	0.0334515	0.0178087	APP/HSP90AB1/EP300	3
	GO:0048704	embryonic skeletal system morphogenesis	0.0129438	0.0334515	0.0178087	SMAD2/CTNNB1/SMAD3	3
	GO:0000726	non-recombinational repair	0.0133205	0.0343428	0.0182832	XRCC6/PRKDC/BRCA1	3
	GO:0051651	maintenance of location in cell	0.0137035	0.0350002	0.0186332	HNRNPU/AKT1/HSPA5	3
	GO:0055006	cardiac cell development	0.0137035	0.0350002	0.0186332	HNRNPU/CDK1/OBSL1	3
	GO:0060337	type I interferon signaling pathway	0.0137035	0.0350002	0.0186332	CDC37/HSP90AB1/IKBKE	3
	GO:0071357	cellular response to type I interferon	0.0137035	0.0350002	0.0186332	CDC37/HSP90AB1/IKBKE	3
	GO:0048010	vascular endothelial growth factor receptor signaling pathway	0.0140926	0.0358448	0.0190828	HSP90AA1/HSPB1/SRC	3
	GO:0007044	cell-substrate junction assembly	0.0144881	0.0364462	0.019403	FN1/SRC/SMAD3	3
	GO:0030316	osteoclast differentiation	0.0144881	0.0364462	0.019403	TRAF6/SRC/CTNNB1	3
	GO:0043255	regulation of carbohydrate biosynthetic process	0.0144881	0.0364462	0.019403	AKT1/EP300/CLTC	3
	GO:0048709	oligodendrocyte differentiation	0.0144881	0.0364462	0.019403	HDAC2/HDAC1/CTNNB1	3
	GO:0006626	protein targeting to mitochondrion	0.0148897	0.0372533	0.0198327	HSP90AA1/HSPA4/HUWE1	3
	GO:0030038	contractile actin filament bundle assembly	0.0148897	0.0372533	0.0198327	CUL3/SRC/SMAD3	3
	GO:0043149	stress fiber assembly	0.0148897	0.0372533	0.0198327	CUL3/SRC/SMAD3	3
	GO:0034340	response to type I interferon	0.0152977	0.0379258	0.0201907	CDC37/HSP90AB1/IKBKE	3
	GO:0048525	negative regulation of viral process	0.0152977	0.0379258	0.0201907	HDAC1/JUN/TARDBP	3
	GO:0036503	ERAD pathway	0.0157119	0.0387971	0.0206545	HSPA5/VCP/FBXO6	3
	GO:0055024	regulation of cardiac muscle tissue development	0.0157119	0.0387971	0.0206545	CDK1/ARRB2/MAPK1	3
	GO:0060079	excitatory postsynaptic potential	0.0157119	0.0387971	0.0206545	APP/AKT1/ARRB2	3
	GO:0000018	regulation of DNA recombination	0.0161324	0.0393818	0.0209658	RPA2/PARP1/FUS	3
	GO:0021549	cerebellum development	0.0165593	0.040393	0.0215042	TP53/EZH2/HSPA5	3
	GO:0034766	negative regulation of ion transmembrane transport	0.0169924	0.0411375	0.0219005	AKT1/YWHAE/YWHAQ	3
	GO:0019233	sensory perception of pain	0.0174318	0.0420746	0.0223994	NTRK1/ARRB2/MAPK1	3
	GO:1901800	positive regulation of proteasomal protein catabolic process	0.0174318	0.0420746	0.0223994	AKT1/VCP/MDM2	3
	GO:0007009	plasma membrane organization	0.0178776	0.0428856	0.0228311	MYH9/AKT1/AR	3
	GO:1902750	negative regulation of cell cycle G2/M phase transition	0.0178776	0.0428856	0.0228311	CDK1/CUL1/BRCA1	3
	GO:0051341	regulation of oxidoreductase activity	0.0187882	0.0447105	0.0238027	AKT1/HSP90AA1/EGFR	3
	GO:0051225	spindle assembly	0.0192529	0.0456813	0.0243195	HNRNPU/FLNA/TUBB	3
	GO:0060071	Wnt signaling pathway, planar cell polarity pathway	0.0192529	0.0456813	0.0243195	ARRB2/SMURF1/CLTC	3
	GO:0099565	chemical synaptic transmission, postsynaptic	0.0192529	0.0456813	0.0243195	APP/AKT1/ARRB2	3
	GO:0021761	limbic system development	0.0197241	0.0465587	0.0247866	HDAC1/EZH2/YWHAE	3
	GO:0090175	regulation of establishment of planar polarity	0.0202015	0.0475809	0.0253308	ARRB2/SMURF1/CLTC	3
	GO:0022037	metencephalon development	0.0206854	0.0484014	0.0257676	TP53/EZH2/HSPA5	3
	GO:0031623	receptor internalization	0.0206854	0.0484014	0.0257676	GRB2/ARRB2/CLTC	3
	GO:0035305	negative regulation of dephosphorylation	0.0206854	0.0484014	0.0257676	YWHAE/YWHAB/CCDC8	3
	GO:0072676	lymphocyte migration	0.0206854	0.0484014	0.0257676	APP/AKT1/ITGA4	3
	GO:1904019	epithelial cell apoptotic process	0.0206854	0.0484014	0.0257676	ARRB2/ITGA4/RB1	3
	GO:0001938	positive regulation of endothelial cell proliferation	0.0211756	0.0494763	0.0263399	AKT1/JUN/ITGA4	3
	GO:0010918	positive regulation of mitochondrial membrane potential	0.00119407	0.00505123	0.00268914	AKT1/VCP	2
	GO:0048340	paraxial mesoderm morphogenesis	0.00119407	0.00505123	0.00268914	SMAD2/SMAD3	2
	GO:0060768	regulation of epithelial cell proliferation involved in prostate gland development	0.00119407	0.00505123	0.00268914	AR/CTNNB1	2
	GO:1901526	positive regulation of mitophagy	0.00119407	0.00505123	0.00268914	CDC37/SMURF1	2
	GO:1902101	positive regulation of metaphase/anaphase transition of cell cycle	0.00119407	0.00505123	0.00268914	CUL3/RB1	2
	GO:1903799	negative regulation of production of miRNAs involved in gene silencing by miRNA	0.00119407	0.00505123	0.00268914	TP53/ESR1	2
	GO:1903800	positive regulation of production of miRNAs involved in gene silencing by miRNA	0.00119407	0.00505123	0.00268914	TP53/EGFR	2
	GO:1903862	positive regulation of oxidative phosphorylation	0.00119407	0.00505123	0.00268914	CDK1/VCP	2
	GO:0009950	dorsal/ventral axis specification	0.00145443	0.00587398	0.00312715	SMAD2/CTNNB1	2
	GO:0033148	positive regulation of intracellular estrogen receptor signaling pathway	0.00145443	0.00587398	0.00312715	PARP1/AR	2
	GO:0033234	negative regulation of protein sumoylation	0.00145443	0.00587398	0.00312715	RELA/CTNNB1	2
	GO:0051974	negative regulation of telomerase activity	0.00145443	0.00587398	0.00312715	TP53/SRC	2
	GO:0060439	trachea morphogenesis	0.00145443	0.00587398	0.00312715	CTNNB1/MAPK1	2
	GO:0060736	prostate gland growth	0.00145443	0.00587398	0.00312715	ESR1/AR	2
	GO:0060767	epithelial cell proliferation involved in prostate gland development	0.00145443	0.00587398	0.00312715	AR/CTNNB1	2
	GO:0072584	caveolin-mediated endocytosis	0.00145443	0.00587398	0.00312715	SRC/MAPK1	2
	GO:1905820	positive regulation of chromosome separation	0.00145443	0.00587398	0.00312715	CUL3/RB1	2
	GO:1990440	positive regulation of transcription from RNA polymerase II promoter in response to endoplasmic reticulum stress	0.00145443	0.00587398	0.00312715	TP53/HSPA5	2
	GO:0006983	ER overload response	0.00173935	0.00673738	0.0035868	TP53/HSPA5	2
	GO:0010623	programmed cell death involved in cell development	0.00173935	0.00673738	0.0035868	NTRK1/PRKDC	2
	GO:0010826	negative regulation of centrosome duplication	0.00173935	0.00673738	0.0035868	NPM1/BRCA1	2
	GO:0034244	negative regulation of transcription elongation from RNA polymerase II promoter	0.00173935	0.00673738	0.0035868	HNRNPU/EZH2	2
	GO:0051095	regulation of helicase activity	0.00173935	0.00673738	0.0035868	TP53/MCM2	2
	GO:0060742	epithelial cell differentiation involved in prostate gland development	0.00173935	0.00673738	0.0035868	AR/CTNNB1	2
	GO:0097201	negative regulation of transcription from RNA polymerase II promoter in response to stress	0.00173935	0.00673738	0.0035868	JUN/VHL	2
	GO:0099640	axo-dendritic protein transport	0.00173935	0.00673738	0.0035868	HNRNPU/HSPB1	2
	GO:1903894	regulation of IRE1-mediated unfolded protein response	0.00173935	0.00673738	0.0035868	HSPA5/COPS5	2
	GO:0000054	ribosomal subunit export from nucleus	0.00204858	0.00771216	0.00410575	NPM1/XPO1	2
	GO:0033750	ribosome localization	0.00204858	0.00771216	0.00410575	NPM1/XPO1	2
	GO:0071287	cellular response to manganese ion	0.00204858	0.00771216	0.00410575	APP/HSPA5	2
	GO:1904925	positive regulation of autophagy of mitochondrion in response to mitochondrial depolarization	0.00204858	0.00771216	0.00410575	CDC37/SMURF1	2
	GO:1990403	embryonic brain development	0.00204858	0.00771216	0.00410575	RPL10/CTNNB1	2
	GO:0006268	DNA unwinding involved in DNA replication	0.00238185	0.0087217	0.0046432	RPA1/MCM2	2
	GO:0032785	negative regulation of DNA-templated transcription, elongation	0.00238185	0.0087217	0.0046432	HNRNPU/EZH2	2
	GO:0035112	genitalia morphogenesis	0.00238185	0.0087217	0.0046432	AR/CTNNB1	2
	GO:0046606	negative regulation of centrosome cycle	0.00238185	0.0087217	0.0046432	NPM1/BRCA1	2
	GO:0060009	Sertoli cell development	0.00238185	0.0087217	0.0046432	FLNA/NTRK1	2
	GO:0071391	cellular response to estrogen stimulus	0.00238185	0.0087217	0.0046432	ESR1/MDM2	2
	GO:0071428	rRNA-containing ribonucleoprotein complex export from nucleus	0.00238185	0.0087217	0.0046432	NPM1/XPO1	2
	GO:0090151	establishment of protein localization to mitochondrial membrane	0.00238185	0.0087217	0.0046432	HSP90AA1/HSPA4	2
	GO:1903351	cellular response to dopamine	0.00238185	0.0087217	0.0046432	HDAC2/MAPK1	2
	GO:1904923	regulation of autophagy of mitochondrion in response to mitochondrial depolarization	0.00238185	0.0087217	0.0046432	CDC37/SMURF1	2
	GO:0034349	glial cell apoptotic process	0.00273891	0.00976231	0.00519719	TP53/RB1	2
	GO:0045410	positive regulation of interleukin-6 biosynthetic process	0.00273891	0.00976231	0.00519719	APP/TRAF6	2
	GO:0045838	positive regulation of membrane potential	0.00273891	0.00976231	0.00519719	AKT1/VCP	2
	GO:0050961	detection of temperature stimulus involved in sensory perception	0.00273891	0.00976231	0.00519719	NTRK1/ARRB2	2
	GO:0050965	detection of temperature stimulus involved in sensory perception of pain	0.00273891	0.00976231	0.00519719	NTRK1/ARRB2	2
	GO:0098840	protein transport along microtubule	0.00273891	0.00976231	0.00519719	HNRNPU/HSPB1	2
	GO:0099118	microtubule-based protein transport	0.00273891	0.00976231	0.00519719	HNRNPU/HSPB1	2
	GO:1903350	response to dopamine	0.00273891	0.00976231	0.00519719	HDAC2/MAPK1	2
	GO:1903729	regulation of plasma membrane organization	0.00273891	0.00976231	0.00519719	MYH9/AR	2
	GO:0010225	response to UV-C	0.00311951	0.0109132	0.00580989	TP53/MDM2	2
	GO:0048385	regulation of retinoic acid receptor signaling pathway	0.00311951	0.0109132	0.00580989	EZH2/SNW1	2
	GO:0060572	morphogenesis of an epithelial bud	0.00311951	0.0109132	0.00580989	AR/CTNNB1	2
	GO:0060965	negative regulation of gene silencing by miRNA	0.00311951	0.0109132	0.00580989	TP53/ESR1	2
	GO:1990000	amyloid fibril formation	0.00311951	0.0109132	0.00580989	APP/MDM2	2
	GO:0006474	N-terminal protein amino acid acetylation	0.00352339	0.0119114	0.00634129	EP300/CREBBP	2
	GO:0006978	DNA damage response, signal transduction by p53 class mediator resulting in transcription of p21 class mediator	0.00352339	0.0119114	0.00634129	TP53/BRCA1	2
	GO:0032460	negative regulation of protein oligomerization	0.00352339	0.0119114	0.00634129	EP300/SRC	2
	GO:0033145	positive regulation of intracellular steroid hormone receptor signaling pathway	0.00352339	0.0119114	0.00634129	PARP1/AR	2
	GO:0038092	nodal signaling pathway	0.00352339	0.0119114	0.00634129	SMAD2/SMAD3	2
	GO:2000641	regulation of early endosome to late endosome transport	0.00352339	0.0119114	0.00634129	SRC/MAPK1	2
	GO:0006349	regulation of gene expression by genetic imprinting	0.00395031	0.0130259	0.00693463	EED/BRCA1	2
	GO:0007252	I-kappaB phosphorylation	0.00395031	0.0130259	0.00693463	AKT1/IKBKE	2
	GO:0009048	dosage compensation by inactivation of X chromosome	0.00395031	0.0130259	0.00693463	HNRNPU/BRCA1	2
	GO:0031293	membrane protein intracellular domain proteolysis	0.00395031	0.0130259	0.00693463	TRAF6/RELA	2
	GO:0035994	response to muscle stretch	0.00395031	0.0130259	0.00693463	JUN/RELA	2
	GO:0042772	DNA damage response, signal transduction resulting in transcription	0.00395031	0.0130259	0.00693463	TP53/BRCA1	2
	GO:0045056	transcytosis	0.00395031	0.0130259	0.00693463	SRC/CLTC	2
	GO:0048339	paraxial mesoderm development	0.00395031	0.0130259	0.00693463	SMAD2/SMAD3	2
	GO:0060749	mammary gland alveolus development	0.00395031	0.0130259	0.00693463	ESR1/AR	2
	GO:0061377	mammary gland lobule development	0.00395031	0.0130259	0.00693463	ESR1/AR	2
	GO:2000757	negative regulation of peptidyl-lysine acetylation	0.00395031	0.0130259	0.00693463	HDAC2/BRCA1	2
	GO:0016048	detection of temperature stimulus	0.00440001	0.0141178	0.00751593	NTRK1/ARRB2	2
	GO:0048025	negative regulation of mRNA splicing, via spliceosome	0.00440001	0.0141178	0.00751593	HNRNPK/U2AF2	2
	GO:0060149	negative regulation of posttranscriptional gene silencing	0.00440001	0.0141178	0.00751593	TP53/ESR1	2
	GO:0060438	trachea development	0.00440001	0.0141178	0.00751593	CTNNB1/MAPK1	2
	GO:0060716	labyrinthine layer blood vessel development	0.00440001	0.0141178	0.00751593	AKT1/MAPK1	2
	GO:0060967	negative regulation of gene silencing by RNA	0.00440001	0.0141178	0.00751593	TP53/ESR1	2
	GO:0071243	cellular response to arsenic-containing substance	0.00440001	0.0141178	0.00751593	HNRNPA1/VCP	2
	GO:0090201	negative regulation of release of cytochrome c from mitochondria	0.00440001	0.0141178	0.00751593	AKT1/ARRB2	2
	GO:1902074	response to salt	0.00440001	0.0141178	0.00751593	HNRNPA1/HSPA5	2
	GO:1902176	negative regulation of oxidative stress-induced intrinsic apoptotic signaling pathway	0.00440001	0.0141178	0.00751593	AKT1/HSPB1	2
	GO:2000010	positive regulation of protein localization to cell surface	0.00440001	0.0141178	0.00751593	AKT1/HSP90AB1	2
	GO:0007549	dosage compensation	0.00487225	0.0153121	0.00815175	HNRNPU/BRCA1	2
	GO:0010042	response to manganese ion	0.00487225	0.0153121	0.00815175	APP/HSPA5	2
	GO:0030220	platelet formation	0.00487225	0.0153121	0.00815175	MYH9/EP300	2
	GO:0032042	mitochondrial DNA metabolic process	0.00487225	0.0153121	0.00815175	TP53/PARP1	2
	GO:0042535	positive regulation of tumor necrosis factor biosynthetic process	0.00487225	0.0153121	0.00815175	APP/HSPB1	2
	GO:0045655	regulation of monocyte differentiation	0.00487225	0.0153121	0.00815175	MYC/JUN	2
	GO:0060008	Sertoli cell differentiation	0.00487225	0.0153121	0.00815175	FLNA/NTRK1	2
	GO:0060039	pericardium development	0.00487225	0.0153121	0.00815175	SMAD2/SMAD3	2
	GO:0098780	response to mitochondrial depolarisation	0.00487225	0.0153121	0.00815175	CDC37/SMURF1	2
	GO:1903599	positive regulation of autophagy of mitochondrion	0.00487225	0.0153121	0.00815175	CDC37/SMURF1	2
	GO:0032332	positive regulation of chondrocyte differentiation	0.00536678	0.0166226	0.0088494	RELA/SMAD3	2
	GO:0036344	platelet morphogenesis	0.00536678	0.0166226	0.0088494	MYH9/EP300	2
	GO:0048485	sympathetic nervous system development	0.00536678	0.0166226	0.0088494	NTRK1/CTNNB1	2
	GO:0050951	sensory perception of temperature stimulus	0.00536678	0.0166226	0.0088494	NTRK1/ARRB2	2
	GO:0051900	regulation of mitochondrial depolarization	0.00536678	0.0166226	0.0088494	PARP1/SRC	2
	GO:0071459	protein localization to chromosome, centromeric region	0.00536678	0.0166226	0.0088494	CDK1/RB1	2
	GO:1900273	positive regulation of long-term synaptic potentiation	0.00536678	0.0166226	0.0088494	APP/STAU1	2
	GO:1903055	positive regulation of extracellular matrix organization	0.00536678	0.0166226	0.0088494	RB1/SMAD3	2
	GO:0001759	organ induction	0.00588337	0.017895	0.00952683	AR/CTNNB1	2
	GO:0007063	regulation of sister chromatid cohesion	0.00588337	0.017895	0.00952683	RB1/CTNNB1	2
	GO:0007398	ectoderm development	0.00588337	0.017895	0.00952683	SMURF1/CTNNB1	2
	GO:0030878	thyroid gland development	0.00588337	0.017895	0.00952683	SMAD3/MAPK1	2
	GO:0031342	negative regulation of cell killing	0.00588337	0.017895	0.00952683	ARRB2/HSP90AB1	2
	GO:0033622	integrin activation	0.00588337	0.017895	0.00952683	FN1/SRC	2
	GO:0043496	regulation of protein homodimerization activity	0.00588337	0.017895	0.00952683	ITGA4/HSPA5	2
	GO:0046599	regulation of centriole replication	0.00588337	0.017895	0.00952683	NPM1/BRCA1	2
	GO:0060065	uterus development	0.00588337	0.017895	0.00952683	ESR1/SRC	2
	GO:1901984	negative regulation of protein acetylation	0.00588337	0.017895	0.00952683	HDAC2/BRCA1	2
	GO:0006359	regulation of transcription by RNA polymerase III	0.00642178	0.0191522	0.0101961	AR/BRCA1	2
	GO:0007617	mating behavior	0.00642178	0.0191522	0.0101961	APP/HDAC2	2
	GO:0030539	male genitalia development	0.00642178	0.0191522	0.0101961	AR/CTNNB1	2
	GO:0032799	low-density lipoprotein receptor particle metabolic process	0.00642178	0.0191522	0.0101961	HNRNPK/CLTC	2
	GO:0048714	positive regulation of oligodendrocyte differentiation	0.00642178	0.0191522	0.0101961	HDAC2/HDAC1	2
	GO:0051882	mitochondrial depolarization	0.00642178	0.0191522	0.0101961	PARP1/SRC	2
	GO:0071157	negative regulation of cell cycle arrest	0.00642178	0.0191522	0.0101961	HSP90AB1/MDM2	2
	GO:0072215	regulation of metanephros development	0.00642178	0.0191522	0.0101961	MYC/CTNNB1	2
	GO:2000637	positive regulation of gene silencing by miRNA	0.00642178	0.0191522	0.0101961	TP53/EGFR	2
	GO:0033119	negative regulation of RNA splicing	0.00698176	0.0205177	0.0109231	HNRNPK/U2AF2	2
	GO:0051220	cytoplasmic sequestering of protein	0.00698176	0.0205177	0.0109231	FLNA/YWHAB	2
	GO:0060148	positive regulation of posttranscriptional gene silencing	0.00698176	0.0205177	0.0109231	TP53/EGFR	2
	GO:0071218	cellular response to misfolded protein	0.00698176	0.0205177	0.0109231	CUL3/VCP	2
	GO:1903649	regulation of cytoplasmic transport	0.00698176	0.0205177	0.0109231	SRC/MAPK1	2
	GO:0002053	positive regulation of mesenchymal cell proliferation	0.00756308	0.0218663	0.011641	MYC/CTNNB1	2
	GO:0009299	mRNA transcription	0.00756308	0.0218663	0.011641	TP53/FLNA	2
	GO:0030325	adrenal gland development	0.00756308	0.0218663	0.011641	SMAD2/SMAD3	2
	GO:0050901	leukocyte tethering or rolling	0.00756308	0.0218663	0.011641	ITGA4/VCAM1	2
	GO:0060330	regulation of response to interferon-gamma	0.00756308	0.0218663	0.011641	CDC37/HSP90AB1	2
	GO:0060334	regulation of interferon-gamma-mediated signaling pathway	0.00756308	0.0218663	0.011641	CDC37/HSP90AB1	2
	GO:1900101	regulation of endoplasmic reticulum unfolded protein response	0.00756308	0.0218663	0.011641	HSPA5/COPS5	2
	GO:1904385	cellular response to angiotensin	0.00756308	0.0218663	0.011641	RELA/SRC	2
	GO:0002360	T cell lineage commitment	0.0081655	0.0231704	0.0123353	TP53/PRKDC	2
	GO:0032967	positive regulation of collagen biosynthetic process	0.0081655	0.0231704	0.0123353	HDAC2/ARRB2	2
	GO:0051788	response to misfolded protein	0.0081655	0.0231704	0.0123353	CUL3/VCP	2
	GO:0060740	prostate gland epithelium morphogenesis	0.0081655	0.0231704	0.0123353	ESR1/AR	2
	GO:1903203	regulation of oxidative stress-induced neuron death	0.0081655	0.0231704	0.0123353	PARP1/CTNNB1	2
	GO:1903579	negative regulation of ATP metabolic process	0.0081655	0.0231704	0.0123353	TP53/PARP1	2
	GO:0010714	positive regulation of collagen metabolic process	0.00878879	0.0247425	0.0131722	HDAC2/ARRB2	2
	GO:0010971	positive regulation of G2/M transition of mitotic cell cycle	0.00878879	0.0247425	0.0131722	APP/CDK1	2
	GO:0036475	neuron death in response to oxidative stress	0.00878879	0.0247425	0.0131722	PARP1/CTNNB1	2
	GO:0048143	astrocyte activation	0.00878879	0.0247425	0.0131722	APP/EGFR	2
	GO:0071514	genetic imprinting	0.00878879	0.0247425	0.0131722	EED/BRCA1	2
	GO:0001702	gastrulation with mouth forming second	0.00943272	0.0260576	0.0138724	RNF2/CTNNB1	2
	GO:0006515	protein quality control for misfolded or incompletely synthesized proteins	0.00943272	0.0260576	0.0138724	CUL3/VCP	2
	GO:0033598	mammary gland epithelial cell proliferation	0.00943272	0.0260576	0.0138724	ESR1/MAPK1	2
	GO:0045408	regulation of interleukin-6 biosynthetic process	0.00943272	0.0260576	0.0138724	APP/TRAF6	2
	GO:0050686	negative regulation of mRNA processing	0.00943272	0.0260576	0.0138724	HNRNPK/U2AF2	2
	GO:0060512	prostate gland morphogenesis	0.00943272	0.0260576	0.0138724	ESR1/AR	2
	GO:0086013	membrane repolarization during cardiac muscle cell action potential	0.00943272	0.0260576	0.0138724	FLNA/YWHAE	2
	GO:1900543	negative regulation of purine nucleotide metabolic process	0.00943272	0.0260576	0.0138724	TP53/PARP1	2
	GO:1990776	response to angiotensin	0.00943272	0.0260576	0.0138724	RELA/SRC	2
	GO:0000083	regulation of transcription involved in G1/S transition of mitotic cell cycle	0.0100971	0.0276508	0.0147205	PCNA/RB1	2
	GO:0010800	positive regulation of peptidyl-threonine phosphorylation	0.0100971	0.0276508	0.0147205	APP/MAPK1	2
	GO:0010954	positive regulation of protein processing	0.0100971	0.0276508	0.0147205	MYH9/SRC	2
	GO:0031365	N-terminal protein amino acid modification	0.0100971	0.0276508	0.0147205	EP300/CREBBP	2
	GO:0042226	interleukin-6 biosynthetic process	0.0100971	0.0276508	0.0147205	APP/TRAF6	2
	GO:0045980	negative regulation of nucleotide metabolic process	0.0100971	0.0276508	0.0147205	TP53/PARP1	2
	GO:0000002	mitochondrial genome maintenance	0.0107816	0.0291284	0.0155072	TP53/PARP1	2
	GO:0034243	regulation of transcription elongation from RNA polymerase II promoter	0.0107816	0.0291284	0.0155072	HNRNPU/EZH2	2
	GO:0044818	mitotic G2/M transition checkpoint	0.0107816	0.0291284	0.0155072	CDK1/BRCA1	2
	GO:0048147	negative regulation of fibroblast proliferation	0.0107816	0.0291284	0.0155072	MYC/TP53	2
	GO:0048384	retinoic acid receptor signaling pathway	0.0107816	0.0291284	0.0155072	EZH2/SNW1	2
	GO:0002082	regulation of oxidative phosphorylation	0.0114861	0.030578	0.0162789	CDK1/VCP	2
	GO:0003299	muscle hypertrophy in response to stress	0.0114861	0.030578	0.0162789	EZH2/SMAD3	2
	GO:0010165	response to X-ray	0.0114861	0.030578	0.0162789	TP53/XRCC6	2
	GO:0014887	cardiac muscle adaptation	0.0114861	0.030578	0.0162789	EZH2/SMAD3	2
	GO:0014898	cardiac muscle hypertrophy in response to stress	0.0114861	0.030578	0.0162789	EZH2/SMAD3	2
	GO:0019098	reproductive behavior	0.0114861	0.030578	0.0162789	APP/HDAC2	2
	GO:0031572	G2 DNA damage checkpoint	0.0114861	0.030578	0.0162789	CDK1/BRCA1	2
	GO:0043457	regulation of cellular respiration	0.0114861	0.030578	0.0162789	CDK1/VCP	2
	GO:0086011	membrane repolarization during action potential	0.0114861	0.030578	0.0162789	FLNA/YWHAE	2
	GO:1903319	positive regulation of protein maturation	0.0114861	0.030578	0.0162789	MYH9/SRC	2
	GO:2000406	positive regulation of T cell migration	0.0114861	0.030578	0.0162789	APP/ITGA4	2
	GO:0008608	attachment of spindle microtubules to kinetochore	0.0122103	0.0319935	0.0170325	HNRNPU/RB1	2
	GO:0045907	positive regulation of vasoconstriction	0.0122103	0.0319935	0.0170325	AKT1/EGFR	2
	GO:0045922	negative regulation of fatty acid metabolic process	0.0122103	0.0319935	0.0170325	AKT1/BRCA1	2
	GO:0046685	response to arsenic-containing substance	0.0122103	0.0319935	0.0170325	HNRNPA1/VCP	2
	GO:0051085	chaperone cofactor-dependent protein refolding	0.0122103	0.0319935	0.0170325	HSPA5/HSPA8	2
	GO:0051385	response to mineralocorticoid	0.0122103	0.0319935	0.0170325	PARP1/SRC	2
	GO:0051968	positive regulation of synaptic transmission, glutamatergic	0.0122103	0.0319935	0.0170325	NTRK1/EGFR	2
	GO:0060674	placenta blood vessel development	0.0122103	0.0319935	0.0170325	AKT1/MAPK1	2
	GO:0071295	cellular response to vitamin	0.0122103	0.0319935	0.0170325	SNW1/MDM2	2
	GO:0009303	rRNA transcription	0.012954	0.0334515	0.0178087	TP53/SIRT7	2
	GO:0010092	specification of animal organ identity	0.012954	0.0334515	0.0178087	AR/CTNNB1	2
	GO:0010464	regulation of mesenchymal cell proliferation	0.012954	0.0334515	0.0178087	MYC/CTNNB1	2
	GO:0014072	response to isoquinoline alkaloid	0.012954	0.0334515	0.0178087	RELA/MDM2	2
	GO:0016242	negative regulation of macroautophagy	0.012954	0.0334515	0.0178087	TP53/AKT1	2
	GO:0036003	positive regulation of transcription from RNA polymerase II promoter in response to stress	0.012954	0.0334515	0.0178087	TP53/HSPA5	2
	GO:0043278	response to morphine	0.012954	0.0334515	0.0178087	RELA/MDM2	2
	GO:0061036	positive regulation of cartilage development	0.012954	0.0334515	0.0178087	RELA/SMAD3	2
	GO:1902692	regulation of neuroblast proliferation	0.012954	0.0334515	0.0178087	TP53/CTNNB1	2
	GO:0010922	positive regulation of phosphatase activity	0.013717	0.0350002	0.0186332	HSP90AB1/SMAD3	2
	GO:0031128	developmental induction	0.013717	0.0350002	0.0186332	AR/CTNNB1	2
	GO:0032148	activation of protein kinase B activity	0.013717	0.0350002	0.0186332	AKT1/SRC	2
	GO:0033120	positive regulation of RNA splicing	0.013717	0.0350002	0.0186332	U2AF2/SNW1	2
	GO:0042533	tumor necrosis factor biosynthetic process	0.013717	0.0350002	0.0186332	APP/HSPB1	2
	GO:0042534	regulation of tumor necrosis factor biosynthetic process	0.013717	0.0350002	0.0186332	APP/HSPB1	2
	GO:0043516	regulation of DNA damage response, signal transduction by p53 class mediator	0.013717	0.0350002	0.0186332	TP53/MDM2	2
	GO:0001893	maternal placenta development	0.0144991	0.0364462	0.019403	AKT1/MAPK1	2
	GO:0021955	central nervous system neuron axonogenesis	0.0144991	0.0364462	0.019403	HSP90AA1/HSP90AB1	2
	GO:0032735	positive regulation of interleukin-12 production	0.0144991	0.0364462	0.019403	TRAF6/RELA	2
	GO:0032801	receptor catabolic process	0.0144991	0.0364462	0.019403	SMURF1/CLTC	2
	GO:0033144	negative regulation of intracellular steroid hormone receptor signaling pathway	0.0144991	0.0364462	0.019403	HDAC1/BRCA1	2
	GO:0098751	bone cell development	0.0144991	0.0364462	0.019403	EP300/SRC	2
	GO:1905332	positive regulation of morphogenesis of an epithelium	0.0144991	0.0364462	0.019403	AR/CTNNB1	2
	GO:0000578	embryonic axis specification	0.0153001	0.0379258	0.0201907	SMAD2/CTNNB1	2
	GO:0071392	cellular response to estradiol stimulus	0.0153001	0.0379258	0.0201907	ESR1/EGFR	2
	GO:0071634	regulation of transforming growth factor beta production	0.0153001	0.0379258	0.0201907	HSP90AB1/SMAD3	2
	GO:0097242	amyloid-beta clearance	0.0153001	0.0379258	0.0201907	HDAC1/CLTC	2
	GO:2001171	positive regulation of ATP biosynthetic process	0.0153001	0.0379258	0.0201907	APP/VCP	2
	GO:0003156	regulation of animal organ formation	0.0161197	0.0393805	0.0209651	AR/CTNNB1	2
	GO:0006270	DNA replication initiation	0.0161197	0.0393805	0.0209651	CDK2/MCM2	2
	GO:0006623	protein targeting to vacuole	0.0161197	0.0393805	0.0209651	HSPA8/SMURF1	2
	GO:0030212	hyaluronan metabolic process	0.0161197	0.0393805	0.0209651	AKT1/CLTC	2
	GO:0032885	regulation of polysaccharide biosynthetic process	0.0161197	0.0393805	0.0209651	AKT1/CLTC	2
	GO:0034405	response to fluid shear stress	0.0161197	0.0393805	0.0209651	AKT1/SRC	2
	GO:0051084	'de novo' posttranslational protein folding	0.0161197	0.0393805	0.0209651	HSPA5/HSPA8	2
	GO:0060236	regulation of mitotic spindle organization	0.0161197	0.0393805	0.0209651	HNRNPU/CLTC	2
	GO:2000403	positive regulation of lymphocyte migration	0.0161197	0.0393805	0.0209651	APP/ITGA4	2
	GO:0016572	histone phosphorylation	0.0169577	0.0411153	0.0218887	CDK2/CDK1	2
	GO:0019068	virion assembly	0.0169577	0.0411153	0.0218887	RPS27A/UBC	2
	GO:0035329	hippo signaling	0.0169577	0.0411153	0.0218887	YWHAE/YWHAB	2
	GO:0045022	early endosome to late endosome transport	0.0169577	0.0411153	0.0218887	SRC/MAPK1	2
	GO:0048009	insulin-like growth factor receptor signaling pathway	0.0169577	0.0411153	0.0218887	AKT1/AR	2
	GO:0060045	positive regulation of cardiac muscle cell proliferation	0.0169577	0.0411153	0.0218887	CDK1/MAPK1	2
	GO:0071604	transforming growth factor beta production	0.0169577	0.0411153	0.0218887	HSP90AB1/SMAD3	2
	GO:1904037	positive regulation of epithelial cell apoptotic process	0.0169577	0.0411153	0.0218887	ARRB2/ITGA4	2
	GO:0045911	positive regulation of DNA recombination	0.0178139	0.0428039	0.0227877	PARP1/FUS	2
	GO:0050775	positive regulation of dendrite morphogenesis	0.0178139	0.0428039	0.0227877	OBSL1/CUL7	2
	GO:0060306	regulation of membrane repolarization	0.0178139	0.0428039	0.0227877	FLNA/YWHAE	2
	GO:0060969	negative regulation of gene silencing	0.0178139	0.0428039	0.0227877	TP53/ESR1	2
	GO:2000648	positive regulation of stem cell proliferation	0.0178139	0.0428039	0.0227877	HNRNPU/CTNNB1	2
	GO:0006734	NADH metabolic process	0.0186881	0.0445054	0.0236935	TP53/VCP	2
	GO:0007618	mating	0.0186881	0.0445054	0.0236935	APP/HDAC2	2
	GO:0045124	regulation of bone resorption	0.0186881	0.0445054	0.0236935	SRC/EGFR	2
	GO:0071548	response to dexamethasone	0.0186881	0.0445054	0.0236935	PCNA/EGFR	2
	GO:0072583	clathrin-dependent endocytosis	0.0186881	0.0445054	0.0236935	ITGA4/CLTC	2
	GO:0006458	'de novo' protein folding	0.0195802	0.0462869	0.0246419	HSPA5/HSPA8	2
	GO:0040019	positive regulation of embryonic development	0.0195802	0.0462869	0.0246419	AR/CTNNB1	2
	GO:0090224	regulation of spindle organization	0.0195802	0.0462869	0.0246419	HNRNPU/CLTC	2
	GO:0098927	vesicle-mediated transport between endosomal compartments	0.0195802	0.0462869	0.0246419	SRC/MAPK1	2
	GO:1903053	regulation of extracellular matrix organization	0.0195802	0.0462869	0.0246419	RB1/SMAD3	2
	GO:0010907	positive regulation of glucose metabolic process	0.0204898	0.0481188	0.0256171	AKT1/SRC	2
	GO:0031641	regulation of myelination	0.0204898	0.0481188	0.0256171	AKT1/CTNNB1	2
	GO:0051154	negative regulation of striated muscle cell differentiation	0.0204898	0.0481188	0.0256171	HDAC5/EZH2	2
	GO:0099622	cardiac muscle cell membrane repolarization	0.0204898	0.0481188	0.0256171	FLNA/YWHAE	2
	GO:0010863	positive regulation of phospholipase C activity	0.0214168	0.0497866	0.026505	ESR1/EGFR	2
	GO:0021795	cerebral cortex cell migration	0.0214168	0.0497866	0.026505	CTNNB1/EGFR	2
	GO:0032881	regulation of polysaccharide metabolic process	0.0214168	0.0497866	0.026505	AKT1/CLTC	2
	GO:0032924	activin receptor signaling pathway	0.0214168	0.0497866	0.026505	SMAD2/SMAD3	2
	GO:0034383	low-density lipoprotein particle clearance	0.0214168	0.0497866	0.026505	HNRNPK/CLTC	2
	GO:0045746	negative regulation of Notch signaling pathway	0.0214168	0.0497866	0.026505	AKT1/EGFR	2
	GO:0051602	response to electrical stimulus	0.0214168	0.0497866	0.026505	NTRK1/SRC	2
cellular component	GO:0000790	nuclear chromatin	1.55451e-16	5.40968e-14	3.27264e-14	MYC/TP53/HNRNPK/RNF2/SUZ12/HDAC2/HDAC1/EED/EZH2/JUN/TARDBP/ESR1/AR/RELA/ACTB/RB1/SMAD2/CTNNB1/SMAD3/SIRT7/CREBBP	21
	GO:0005925	focal adhesion	1.33261e-12	1.54583e-10	9.35169e-11	MYH9/HNRNPK/FLNA/NPM1/ITGA4/HSPB1/HSPA5/HSPA8/YWHAZ/YWHAG/YWHAE/YWHAB/ACTB/YWHAQ/CTNNB1/EGFR/CLTC/MAPK1	18
	GO:0005924	cell-substrate adherens junction	1.50849e-12	1.54583e-10	9.35169e-11	MYH9/HNRNPK/FLNA/NPM1/ITGA4/HSPB1/HSPA5/HSPA8/YWHAZ/YWHAG/YWHAE/YWHAB/ACTB/YWHAQ/CTNNB1/EGFR/CLTC/MAPK1	18
	GO:0030055	cell-substrate junction	1.77682e-12	1.54583e-10	9.35169e-11	MYH9/HNRNPK/FLNA/NPM1/ITGA4/HSPB1/HSPA5/HSPA8/YWHAZ/YWHAG/YWHAE/YWHAB/ACTB/YWHAQ/CTNNB1/EGFR/CLTC/MAPK1	18
	GO:0005667	transcription factor complex	3.50275e-10	2.0316e-08	1.22904e-08	HNRNPU/CDK2/TP53/PARP1/HDAC1/XRCC6/JUN/HSP90AB1/EP300/RELA/RB1/SMAD2/CTNNB1/SMAD3/PRKDC	15
	GO:0032993	protein-DNA complex	2.32867e-11	1.62076e-09	9.80495e-10	RPA2/RPA1/RPA3/CDC5L/SUZ12/PARP1/PCNA/XRCC6/NPM1/ESR1/EP300/CTNNB1/PRKDC	13
	GO:0000151	ubiquitin ligase complex	1.44492e-09	6.28541e-08	3.80243e-08	CAND1/RNF2/CUL5/CUL3/CUL1/CUL2/CUL4B/IKBKG/CUL7/VHL/BRCA1/FBXO6/BMI1	13
	GO:0031983	vesicle lumen	1.31785e-08	4.16919e-07	2.5222e-07	CAND1/APP/FN1/EEF1A1/XRCC6/HSP90AA1/HSP90AB1/HSPA8/TUBB/HUWE1/VCP/EGFR/MAPK1	13
	GO:0005819	spindle	1.73722e-08	4.97732e-07	3.01109e-07	APP/HNRNPU/MYH9/AKT1/CDK1/NPM1/CUL3/HSPB1/IKBKG/RB1/CTNNB1/CLTC/MAPK1	13
	GO:0098687	chromosomal region	1.85935e-08	4.97732e-07	3.01109e-07	HNRNPU/RPA2/CDK2/RPA1/CDK1/PARP1/PCNA/XRCC6/EZH2/MCM2/XPO1/SIRT7/PRKDC	13
	GO:0034774	secretory granule lumen	6.56526e-08	1.42794e-06	8.6385e-07	CAND1/APP/FN1/EEF1A1/XRCC6/HSP90AA1/HSP90AB1/HSPA8/TUBB/HUWE1/VCP/MAPK1	12
	GO:0060205	cytoplasmic vesicle lumen	1.15025e-07	2.27395e-06	1.37565e-06	CAND1/APP/FN1/EEF1A1/XRCC6/HSP90AA1/HSP90AB1/HSPA8/TUBB/HUWE1/VCP/MAPK1	12
	GO:0000781	chromosome, telomeric region	4.63688e-10	2.30519e-08	1.39455e-08	RPA2/CDK2/RPA1/CDK1/PARP1/PCNA/XRCC6/EZH2/MCM2/SIRT7/PRKDC	11
	GO:0043025	neuronal cell body	3.62918e-05	0.000308038	0.000186351	APP/STAU1/FLNA/NTRK1/HDAC1/FUS/ITGA4/HSP90AA1/HSP90AB1/SMURF1/MAPK1	11
	GO:1904813	ficolin-1-rich granule lumen	1.12828e-08	4.16919e-07	2.5222e-07	CAND1/EEF1A1/XRCC6/HSP90AA1/HSP90AB1/HSPA8/HUWE1/VCP/MAPK1	9
	GO:0000784	nuclear chromosome, telomeric region	1.21088e-08	4.16919e-07	2.5222e-07	RPA2/RPA1/CDK1/PARP1/PCNA/XRCC6/MCM2/SIRT7/PRKDC	9
	GO:0101002	ficolin-1-rich granule	3.56017e-07	5.89971e-06	3.56909e-06	CAND1/EEF1A1/XRCC6/HSP90AA1/HSP90AB1/HSPA8/HUWE1/VCP/MAPK1	9
	GO:0042470	melanosome	5.63212e-08	1.30665e-06	7.90473e-07	HSP90AA1/HSP90AB1/HSPA5/HSPA8/YWHAZ/YWHAE/YWHAB/CLTC	8
	GO:0048770	pigment granule	5.63212e-08	1.30665e-06	7.90473e-07	HSP90AA1/HSP90AB1/HSPA5/HSPA8/YWHAZ/YWHAE/YWHAB/CLTC	8
	GO:0031461	cullin-RING ubiquitin ligase complex	1.21628e-06	1.62794e-05	9.8484e-06	CAND1/CUL5/CUL3/CUL1/CUL2/CUL4B/CUL7/FBXO6	8
	GO:0036464	cytoplasmic ribonucleoprotein granule	1.07497e-05	0.000106882	6.46596e-05	HNRNPU/STAU1/HNRNPK/TARDBP/PAN2/ACTB/TUBB/VCP	8
	GO:0035770	ribonucleoprotein granule	1.55115e-05	0.000149944	9.07103e-05	HNRNPU/STAU1/HNRNPK/TARDBP/PAN2/ACTB/TUBB/VCP	8
	GO:0098978	glutamatergic synapse	0.000350777	0.00221946	0.00134269	STAU1/FLNA/YWHAZ/YWHAE/RELA/ACTB/SRC/VCP	8
	GO:0033267	axon part	0.000636766	0.00369517	0.00223544	APP/ITGA4/HSP90AA1/HSP90AB1/HSPB1/HSPA8/YWHAE/ACTB	8
	GO:0090575	RNA polymerase II transcription factor complex	1.70751e-05	0.000158556	9.59199e-05	HNRNPU/TP53/JUN/RB1/SMAD2/CTNNB1/SMAD3	7
	GO:0005681	spliceosomal complex	3.85085e-05	0.00031907	0.000193025	HNRNPU/HNRNPK/HNRNPA1/CDC5L/U2AF2/HSPA8/SNW1	7
	GO:0044798	nuclear transcription factor complex	6.51243e-05	0.000503628	0.000304675	HNRNPU/TP53/JUN/RB1/SMAD2/CTNNB1/SMAD3	7
	GO:0061695	transferase complex, transferring phosphorus-containing groups	0.000311498	0.00204531	0.00123733	CDK2/TP53/CDK1/PCNA/IKBKG/RB1/SNW1	7
	GO:0150034	distal axon	0.00055228	0.00335841	0.00203171	APP/ITGA4/HSP90AA1/HSP90AB1/HSPA8/YWHAE/ACTB	7
	GO:0030139	endocytic vesicle	0.00079229	0.00451995	0.00273439	RPS27A/UBC/ARRB2/HSP90AA1/EGFR/CLTC/MDM2	7
	GO:0098589	membrane region	0.00125508	0.00682448	0.00412854	APP/XPO1/TUBB/SRC/CTNNB1/EGFR/MAPK1	7
	GO:0016607	nuclear speck	0.00366432	0.015551	0.00940776	HNRNPU/CDC5L/U2AF2/HDAC5/TARDBP/AR/SNW1	7
	GO:0005911	cell-cell junction	0.0079579	0.0276935	0.0167535	APP/GRB2/MYH9/AKT1/FLNA/OBSL1/CTNNB1	7
	GO:0005635	nuclear envelope	0.00841973	0.0287096	0.0173682	APP/PARP1/XPO1/TUBB/SMAD3/EGFR/UBE2I	7
	GO:0010008	endosome membrane	0.00992418	0.0316845	0.0191679	TRAF6/RPS27A/NTRK1/UBC/EGFR/CLTC/IKBKE	7
	GO:0031519	PcG protein complex	1.17618e-07	2.27395e-06	1.37565e-06	RNF2/SUZ12/HDAC2/EED/EZH2/BMI1	6
	GO:0019005	SCF ubiquitin ligase complex	7.67263e-07	1.1609e-05	7.023e-06	CUL5/CUL3/CUL1/CUL2/CUL4B/FBXO6	6
	GO:0005657	replication fork	1.30999e-06	1.68843e-05	1.02143e-05	RPA2/RPA1/RPA3/TP53/CDC5L/PCNA	6
	GO:0090734	site of DNA damage	1.68051e-06	2.08863e-05	1.26354e-05	RPA2/RPA1/RPA3/TP53/PARP1/VCP	6
	GO:1902554	serine/threonine protein kinase complex	5.03866e-06	5.6563e-05	3.42184e-05	CDK2/CDK1/PCNA/IKBKG/RB1/SNW1	6
	GO:0016605	PML body	9.97045e-06	0.000104183	6.30266e-05	RPA2/RPA1/TP53/RB1/IKBKE/UBE2I	6
	GO:1902911	protein kinase complex	1.73135e-05	0.000158556	9.59199e-05	CDK2/CDK1/PCNA/IKBKG/RB1/SNW1	6
	GO:0005938	cell cortex	0.00438125	0.0179373	0.0108514	MYH9/TRAF6/FLNA/EEF1A1/ACTB/CTNNB1	6
	GO:0045121	membrane raft	0.00488248	0.0191686	0.0115962	APP/TUBB/SRC/CTNNB1/EGFR/MAPK1	6
	GO:0098857	membrane microdomain	0.0049574	0.0191686	0.0115962	APP/TUBB/SRC/CTNNB1/EGFR/MAPK1	6
	GO:0045177	apical part of cell	0.0123207	0.0371104	0.0224503	APP/FN1/HSP90AB1/CTNNB1/VCAM1/EGFR	6
	GO:0030894	replisome	1.65702e-07	3.03496e-06	1.83603e-06	RPA2/RPA1/RPA3/CDC5L/PCNA	5
	GO:0000803	sex chromosome	3.53374e-07	5.89971e-06	3.56909e-06	HNRNPU/CDK2/RNF2/SUZ12/EED	5
	GO:0008180	COP9 signalosome	9.13038e-07	1.3239e-05	8.0091e-06	GRB2/MYH9/HSP90AB1/HSPA5/COPS5	5
	GO:0043596	nuclear replication fork	1.77965e-06	2.13558e-05	1.29194e-05	RPA2/RPA1/RPA3/CDC5L/PCNA	5
	GO:0000307	cyclin-dependent protein kinase holoenzyme complex	2.01222e-06	2.33418e-05	1.41209e-05	CDK2/CDK1/PCNA/RB1/SNW1	5
	GO:0035861	site of double-strand break	1.01788e-05	0.000104183	6.30266e-05	RPA2/RPA3/TP53/PARP1/VCP	5
	GO:0000792	heterochromatin	4.33591e-05	0.000350906	0.000212284	RNF2/SUZ12/HDAC1/EED/SIRT7	5
	GO:0035097	histone methyltransferase complex	6.93214e-05	0.000524431	0.00031726	RNF2/SUZ12/HDAC2/EED/EZH2	5
	GO:0071013	catalytic step 2 spliceosome	7.32608e-05	0.000542442	0.000328156	HNRNPU/HNRNPK/HNRNPA1/CDC5L/SNW1	5
	GO:1904949	ATPase complex	0.000148675	0.00107789	0.000652084	SUZ12/HDAC2/HDAC1/RB1/VCP	5
	GO:0072686	mitotic spindle	0.000212534	0.00145023	0.000877334	HNRNPU/CDK1/IKBKG/CLTC/MAPK1	5
	GO:0034708	methyltransferase complex	0.000251391	0.00168238	0.00101778	RNF2/SUZ12/HDAC2/EED/EZH2	5
	GO:0000922	spindle pole	0.00136473	0.00730653	0.00442017	HNRNPU/NPM1/CUL3/IKBKG/CTNNB1	5
	GO:0030426	growth cone	0.00164092	0.00852299	0.00515608	APP/ITGA4/HSP90AA1/HSP90AB1/YWHAE	5
	GO:0005775	vacuolar lumen	0.00168349	0.00861552	0.00521205	HSP90AA1/HSPA8/TUBB/VCP/MAPK1	5
	GO:0030427	site of polarized growth	0.00186193	0.0091261	0.00552093	APP/ITGA4/HSP90AA1/HSP90AB1/YWHAE	5
	GO:0044448	cell cortex part	0.00225988	0.0109227	0.00660782	MYH9/FLNA/EEF1A1/ACTB/CTNNB1	5
	GO:0044445	cytosolic part	0.00782813	0.0275171	0.0166467	RPL10/UBL4A/RPS27A/HSPA8/IKBKG	5
	GO:0005662	DNA replication factor A complex	7.51011e-07	1.1609e-05	7.023e-06	RPA2/RPA1/RPA3/CDC5L	4
	GO:0035098	ESC/E(Z) complex	9.97533e-07	1.38857e-05	8.40028e-06	SUZ12/HDAC2/EED/EZH2	4
	GO:0043601	nuclear replisome	5.64899e-06	6.14328e-05	3.71644e-05	RPA2/RPA1/RPA3/CDC5L	4
	GO:0005720	nuclear heterochromatin	2.66929e-05	0.000238183	0.000144091	RNF2/SUZ12/EED/SIRT7	4
	GO:0000152	nuclear ubiquitin ligase complex	6.10272e-05	0.000482669	0.000291996	RNF2/CUL7/BRCA1/BMI1	4
	GO:0005876	spindle microtubule	0.000211785	0.00145023	0.000877334	HNRNPU/CDK1/CUL3/CLTC	4
	GO:0010494	cytoplasmic stress granule	0.000326583	0.00210465	0.00127323	STAU1/HNRNPK/TARDBP/VCP	4
	GO:0070603	SWI/SNF superfamily-type complex	0.000559735	0.00335841	0.00203171	SUZ12/HDAC2/HDAC1/RB1	4
	GO:0017053	transcriptional repressor complex	0.000816685	0.00458397	0.00277312	HDAC2/HDAC1/JUN/YWHAB	4
	GO:0030863	cortical cytoskeleton	0.0026857	0.012138	0.00734299	MYH9/FLNA/EEF1A1/ACTB	4
	GO:0034399	nuclear periphery	0.00415347	0.0174146	0.0105351	HNRNPU/TP53/PCNA/SNW1	4
	GO:0030018	Z disc	0.0042672	0.0176784	0.0106947	FLNA/OBSL1/HSPB1/CTNNB1	4
	GO:0031674	I band	0.00565965	0.0215469	0.013035	FLNA/OBSL1/HSPB1/CTNNB1	4
	GO:0072562	blood microparticle	0.00623303	0.0230755	0.0139598	FN1/HSPA8/YWHAZ/ACTB	4
	GO:0030666	endocytic vesicle membrane	0.00968084	0.0313071	0.0189395	RPS27A/UBC/CLTC/MDM2	4
	GO:0000974	Prp19 complex	3.28449e-05	0.000285751	0.000172868	CDC5L/U2AF2/HSPA8	3
	GO:0101031	chaperone complex	0.000171203	0.00121589	0.000735566	CDC37/HSP90AB1/HSPA8	3
	GO:0002102	podosome	0.000438525	0.00272512	0.00164859	HNRNPK/SRC/VCAM1	3
	GO:0005790	smooth endoplasmic reticulum	0.000637099	0.00369517	0.00223544	APP/RPL10/HSPA5	3
	GO:0000791	euchromatin	0.000885328	0.00489038	0.00295849	RNF2/JUN/CTNNB1	3
	GO:0000118	histone deacetylase complex	0.00301403	0.013111	0.00793166	HDAC2/HDAC1/HDAC5	3
	GO:0005905	clathrin-coated pit	0.0049205	0.0191686	0.0115962	APP/ARRB2/CLTC	3
	GO:0018995	host	0.00575823	0.0215469	0.013035	RPS27A/UBC/XPO1	3
	GO:0043657	host cell	0.00575823	0.0215469	0.013035	RPS27A/UBC/XPO1	3
	GO:0044215	other organism	0.00667645	0.0239526	0.0144904	RPS27A/UBC/XPO1	3
	GO:0044216	other organism cell	0.00667645	0.0239526	0.0144904	RPS27A/UBC/XPO1	3
	GO:0044217	other organism part	0.00667645	0.0239526	0.0144904	RPS27A/UBC/XPO1	3
	GO:0005901	caveola	0.00741906	0.0263452	0.0159378	SRC/CTNNB1/MAPK1	3
	GO:0120111	neuron projection cytoplasm	0.00848248	0.0287096	0.0173682	HNRNPU/HSPB1/MAPK1	3
	GO:0000123	histone acetyltransferase complex	0.00876158	0.0293176	0.017736	EP300/ACTB/CREBBP	3
	GO:0005684	U2-type spliceosomal complex	0.0102376	0.0323881	0.0195935	CDC5L/U2AF2/SNW1	3
	GO:0035578	azurophil granule lumen	0.0105491	0.0330728	0.0200077	TUBB/VCP/MAPK1	3
	GO:0031248	protein acetyltransferase complex	0.0118496	0.0361725	0.021883	EP300/ACTB/CREBBP	3
	GO:1902493	acetyltransferase complex	0.0118496	0.0361725	0.021883	EP300/ACTB/CREBBP	3
	GO:0016363	nuclear matrix	0.0171022	0.0491866	0.0297559	HNRNPU/TP53/SNW1	3
	GO:0044853	plasma membrane raft	0.0171022	0.0491866	0.0297559	SRC/CTNNB1/MAPK1	3
	GO:0019908	nuclear cyclin-dependent protein kinase holoenzyme complex	0.00156237	0.00823796	0.00498364	RB1/SNW1	2
	GO:0016580	Sin3 complex	0.00184047	0.0091261	0.00552093	HDAC2/HDAC1	2
	GO:0044292	dendrite terminus	0.00184047	0.0091261	0.00552093	HSP90AA1/HSP90AB1	2
	GO:0016581	NuRD complex	0.00246156	0.0112714	0.00681873	HDAC2/HDAC1	2
	GO:0035102	PRC1 complex	0.00246156	0.0112714	0.00681873	RNF2/BMI1	2
	GO:0045120	pronucleus	0.00246156	0.0112714	0.00681873	EED/EZH2	2
	GO:0090545	CHD-type complex	0.00246156	0.0112714	0.00681873	HDAC2/HDAC1	2
	GO:0000153	cytoplasmic ubiquitin ligase complex	0.00280412	0.0123523	0.00747268	CUL2/VHL	2
	GO:0070822	Sin3-type complex	0.00280412	0.0123523	0.00747268	HDAC2/HDAC1	2
	GO:0090723	growth cone part	0.00355221	0.0152613	0.00923251	APP/YWHAE	2
	GO:0032806	carboxy-terminal domain protein kinase complex	0.00482855	0.0191686	0.0115962	RB1/SNW1	2
	GO:0099091	postsynaptic specialization, intracellular component	0.00482855	0.0191686	0.0115962	SRC/CTNNB1	2
	GO:0044295	axonal growth cone	0.00849739	0.0287096	0.0173682	HSP90AA1/HSP90AB1	2
	GO:0090568	nuclear transcriptional repressor complex	0.00909749	0.0301517	0.0182406	HDAC2/HDAC1	2
	GO:0005719	nuclear euchromatin	0.00971598	0.0313071	0.0189395	JUN/CTNNB1	2
	GO:0071007	U2-type catalytic step 2 spliceosome	0.00971598	0.0313071	0.0189395	CDC5L/SNW1	2
	GO:0032839	dendrite cytoplasm	0.0110074	0.0342016	0.0206906	HNRNPU/MAPK1	2
	GO:0051233	spindle midzone	0.0123701	0.0371104	0.0224503	APP/HNRNPU	2
	GO:0043198	dendritic shaft	0.0138026	0.041054	0.0248361	APP/FLNA	2
	GO:0000795	synaptonemal complex	0.0168711	0.0491866	0.0297559	BRCA1/UBE2I	2
	GO:0099086	synaptonemal structure	0.0168711	0.0491866	0.0297559	BRCA1/UBE2I	2
molecular function	GO:0031625	ubiquitin protein ligase binding	1.04549e-31	3.85786e-29	2.3551e-29	TRAF6/RPA2/TP53/CUL5/RPS27A/UBC/JUN/ARRB2/CUL3/CUL1/CUL2/CUL4B/HSP90AA1/HSP90AB1/HSPA5/HSPA8/YWHAZ/YWHAE/RELA/IKBKG/CUL7/TUBB/RB1/SRC/SMAD2/SMAD3/VCP/EGFR/IKBKE/BRCA1/MDM2	31
	GO:0044389	ubiquitin-like protein ligase binding	6.99162e-31	1.28995e-28	7.87478e-29	TRAF6/RPA2/TP53/CUL5/RPS27A/UBC/JUN/ARRB2/CUL3/CUL1/CUL2/CUL4B/HSP90AA1/HSP90AB1/HSPA5/HSPA8/YWHAZ/YWHAE/RELA/IKBKG/CUL7/TUBB/RB1/SRC/SMAD2/SMAD3/VCP/EGFR/IKBKE/BRCA1/MDM2	31
	GO:0050839	cell adhesion molecule binding	9.77879e-08	2.25523e-06	1.37675e-06	MYH9/FN1/HNRNPK/FLNA/ITGA4/HSP90AB1/HSPA5/HSPA8/YWHAZ/YWHAE/YWHAB/SRC/CTNNB1/VCAM1/EGFR	15
	GO:0001085	RNA polymerase II transcription factor binding	3.03886e-12	1.92825e-10	1.17714e-10	HNRNPU/TP53/HDAC2/HDAC1/HDAC5/JUN/ESR1/AR/EP300/RB1/CTNNB1/SMAD3/CREBBP	13
	GO:0019902	phosphatase binding	2.88658e-11	1.33143e-09	8.12799e-10	GRB2/STAU1/RPA2/TP53/AKT1/CDC5L/SMAD2/CTNNB1/SMAD3/VCP/EGFR/MAPK1/IKBKE	13
	GO:0001228	DNA-binding transcription activator activity, RNA polymerase II-specific	8.93644e-07	1.37398e-05	8.38771e-06	MYC/TP53/HNRNPK/CDC5L/PARP1/JUN/TARDBP/ESR1/AR/EP300/RELA/SMAD2/SMAD3	13
	GO:0045296	cadherin binding	2.8923e-07	5.3363e-06	3.25765e-06	MYH9/HNRNPK/FLNA/HSP90AB1/HSPA5/HSPA8/YWHAZ/YWHAE/YWHAB/SRC/CTNNB1/EGFR	12
	GO:0019787	ubiquitin-like protein transferase activity	2.54268e-06	3.35089e-05	2.04562e-05	TRAF6/UBL4A/RNF2/CUL5/CUL3/SMURF1/HUWE1/VHL/BRCA1/UBE2I/FBXO6/MDM2	12
	GO:0033613	activating transcription factor binding	1.28454e-12	1.18499e-10	7.234e-11	MYC/HDAC1/NPM1/JUN/EP300/RELA/RB1/SMAD2/CTNNB1/SMAD3/CREBBP	11
	GO:0035258	steroid hormone receptor binding	3.13537e-12	1.92825e-10	1.17714e-10	PARP1/PCNA/FUS/ESR1/EP300/RB1/SRC/CTNNB1/SMAD3/SNW1/BRCA1	11
	GO:0042826	histone deacetylase binding	2.53288e-11	1.33143e-09	8.12799e-10	TRAF6/TP53/PARP1/HDAC2/HDAC1/HDAC5/HSP90AA1/HSP90AB1/YWHAE/YWHAB/RELA	11
	GO:0035257	nuclear hormone receptor binding	7.69317e-10	2.83878e-08	1.73299e-08	PARP1/PCNA/FUS/ESR1/EP300/RB1/SRC/CTNNB1/SMAD3/SNW1/BRCA1	11
	GO:0051427	hormone receptor binding	6.15204e-09	1.89175e-07	1.15486e-07	PARP1/PCNA/FUS/ESR1/EP300/RB1/SRC/CTNNB1/SMAD3/SNW1/BRCA1	11
	GO:0019903	protein phosphatase binding	5.37864e-09	1.80429e-07	1.10146e-07	GRB2/STAU1/RPA2/TP53/AKT1/CDC5L/CTNNB1/VCP/EGFR/IKBKE	10
	GO:0003713	transcription coactivator activity	1.0841e-05	0.000106071	6.47534e-05	FUS/NPM1/JUN/EP300/RB1/COPS5/CTNNB1/SNW1/BRCA1/CREBBP	10
	GO:0004842	ubiquitin-protein transferase activity	5.05481e-05	0.000347476	0.000212123	TRAF6/RNF2/CUL5/CUL3/SMURF1/HUWE1/VHL/BRCA1/FBXO6/MDM2	10
	GO:0097718	disordered domain specific binding	1.16243e-13	1.42979e-11	8.72845e-12	FN1/TP53/HSP90AA1/HSP90AB1/RB1/SMAD2/CTNNB1/CLTC/MDM2	9
	GO:0003684	damaged DNA binding	8.33222e-11	3.41621e-09	2.08549e-09	RPA2/RPA1/RPA3/PCNA/XRCC6/CUL4B/EP300/BRCA1/CREBBP	9
	GO:0031490	chromatin DNA binding	1.97296e-08	4.85348e-07	2.9629e-07	HNRNPU/SUZ12/HDAC2/HDAC1/EZH2/EP300/RELA/ACTB/SMAD3	9
	GO:0046332	SMAD binding	1.38176e-08	3.64192e-07	2.22328e-07	FLNA/PARP1/JUN/SMURF1/SMAD2/CTNNB1/SMAD3/SNW1	8
	GO:0047485	protein N-terminus binding	1.588e-07	3.08407e-06	1.88273e-06	TRAF6/RPA2/TP53/PARP1/HDAC1/RELA/YWHAQ/MDM2	8
	GO:0035326	enhancer binding	7.34627e-07	1.1786e-05	7.19498e-06	TP53/HDAC2/HDAC1/JUN/RELA/ACTB/SMAD2/SMAD3	8
	GO:1990841	promoter-specific chromatin binding	7.85898e-09	2.23074e-07	1.3618e-07	HNRNPU/TP53/SUZ12/HDAC2/HDAC1/EZH2/BMI1	7
	GO:0003697	single-stranded DNA binding	3.07616e-06	3.78368e-05	2.30982e-05	HNRNPU/RPA2/RPA1/RPA3/HNRNPK/HNRNPA1/MCM2	7
	GO:0044325	ion channel binding	5.70631e-06	6.19302e-05	3.78065e-05	FLNA/HSP90AB1/YWHAZ/YWHAE/SRC/YWHAQ/CTNNB1	7
	GO:0008022	protein C-terminus binding	8.08877e-05	0.000523641	0.000319667	FN1/XRCC6/EP300/YWHAB/SRC/YWHAQ/CTNNB1	7
	GO:0061630	ubiquitin protein ligase activity	0.000227599	0.00135458	0.00082693	TRAF6/RNF2/SMURF1/HUWE1/VHL/FBXO6/MDM2	7
	GO:0061659	ubiquitin-like protein ligase activity	0.000290167	0.00167299	0.00102131	TRAF6/RNF2/SMURF1/HUWE1/VHL/FBXO6/MDM2	7
	GO:0016887	ATPase activity	0.00547436	0.0187041	0.0114183	MYH9/HSP90AA1/HSP90AB1/HSPA5/HSPA8/MCM2/VCP	7
	GO:0004674	protein serine/threonine kinase activity	0.0110198	0.0327451	0.0199899	CDK2/AKT1/CDK1/EGFR/MAPK1/IKBKE/PRKDC	7
	GO:0030331	estrogen receptor binding	1.10304e-07	2.39425e-06	1.46162e-06	PARP1/PCNA/FUS/ESR1/SRC/CTNNB1	6
	GO:0001102	RNA polymerase II activating transcription factor binding	4.59626e-07	8.07629e-06	4.93032e-06	JUN/EP300/RB1/CTNNB1/SMAD3/CREBBP	6
	GO:0070491	repressing transcription factor binding	2.64636e-06	3.36726e-05	2.05561e-05	MYC/HDAC2/HDAC1/HDAC5/RELA/CTNNB1	6
	GO:0051219	phosphoprotein binding	6.61149e-06	6.9704e-05	4.25521e-05	GRB2/YWHAE/YWHAB/RB1/SRC/MAPK1	6
	GO:0000980	RNA polymerase II distal enhancer sequence-specific DNA binding	1.82789e-05	0.000154112	9.40804e-05	TP53/HDAC2/HDAC1/JUN/RELA/ACTB	6
	GO:0051087	chaperone binding	2.16748e-05	0.000166779	0.000101813	CDC37/FN1/TP53/UBL4A/HSPA5/HSPA8	6
	GO:0001158	enhancer sequence-specific DNA binding	5.17918e-05	0.000347476	0.000212123	TP53/HDAC2/HDAC1/JUN/RELA/ACTB	6
	GO:0031072	heat shock protein binding	5.17918e-05	0.000347476	0.000212123	CDC37/CDK1/HDAC2/HSP90AB1/HSPA5/HSPA8	6
	GO:0051082	unfolded protein binding	8.84361e-05	0.000562637	0.000343472	CDC37/NPM1/HSP90AA1/HSP90AB1/HSPA5/HSPA8	6
	GO:0042623	ATPase activity, coupled	0.00497388	0.017819	0.010878	MYH9/HSP90AA1/HSP90AB1/HSPA5/HSPA8/MCM2	6
	GO:0070412	R-SMAD binding	1.46064e-07	2.99432e-06	1.82794e-06	PARP1/JUN/SMURF1/SMAD2/SMAD3	5
	GO:0051059	NF-kappaB binding	5.02114e-07	8.42182e-06	5.14126e-06	HDAC2/HDAC1/NPM1/EP300/RELA	5
	GO:0050681	androgen receptor binding	4.29986e-06	4.95828e-05	3.02688e-05	EP300/RB1/CTNNB1/SNW1/BRCA1	5
	GO:0048156	tau protein binding	4.81622e-06	5.38541e-05	3.28763e-05	HSP90AA1/HSP90AB1/EP300/ACTB/SMAD2	5
	GO:0005080	protein kinase C binding	1.09233e-05	0.000106071	6.47534e-05	AKT1/HDAC5/HSPB1/YWHAG/SRC	5
	GO:0001047	core promoter binding	1.31265e-05	0.000124197	7.58182e-05	MYC/TP53/HDAC1/NPM1/EZH2	5
	GO:0097110	scaffold protein binding	1.85632e-05	0.000154112	9.40804e-05	CDC37/HSP90AA1/YWHAE/SRC/MDM2	5
	GO:0002039	p53 binding	3.2139e-05	0.000237186	0.000144795	TP53/HDAC1/EP300/CREBBP/MDM2	5
	GO:0002020	protease binding	0.000726239	0.00382832	0.00233707	FN1/TP53/UBC/VCP/CLTC	5
	GO:0005178	integrin binding	0.000834464	0.0042259	0.00257978	MYH9/FN1/SRC/VCAM1/EGFR	5
	GO:0043021	ribonucleoprotein complex binding	0.000863303	0.00430485	0.00262798	HNRNPU/NPM1/EZH2/HSPA5/MDM2	5
	GO:0019887	protein kinase regulator activity	0.0032625	0.0130855	0.00798828	CDC37/NPM1/HSP90AB1/HSPB1/YWHAG	5
	GO:0005516	calmodulin binding	0.0050968	0.0180703	0.0110314	MYH9/AKT1/EEF1A1/EWSR1/EGFR	5
	GO:0019207	kinase regulator activity	0.00588358	0.0199178	0.0121592	CDC37/NPM1/HSP90AB1/HSPB1/YWHAG	5
	GO:0060090	molecular adaptor activity	0.0102372	0.0312193	0.0190584	GRB2/ARRB2/OBSL1/HSPA8/SRC	5
	GO:0003714	transcription corepressor activity	0.0104121	0.0313426	0.0191337	HNRNPU/HDAC1/EZH2/SNW1/CREBBP	5
	GO:0017136	NAD-dependent histone deacetylase activity	1.1517e-06	1.69991e-05	1.03774e-05	HDAC2/HDAC1/HDAC5/SIRT7	4
	GO:0023026	MHC class II protein complex binding	1.52908e-06	2.08975e-05	1.27573e-05	HSP90AA1/HSP90AB1/HSPA8/YWHAE	4
	GO:0034979	NAD-dependent protein deacetylase activity	1.52908e-06	2.08975e-05	1.27573e-05	HDAC2/HDAC1/HDAC5/SIRT7	4
	GO:0001091	RNA polymerase II basal transcription factor binding	4.00191e-06	4.76357e-05	2.90801e-05	HNRNPU/TP53/ESR1/AR	4
	GO:0023023	MHC protein complex binding	1.02291e-05	0.000104848	6.40066e-05	HSP90AA1/HSP90AB1/HSPA8/YWHAE	4
	GO:0004407	histone deacetylase activity	1.6347e-05	0.000150801	9.20593e-05	HDAC2/HDAC1/HDAC5/SIRT7	4
	GO:0033558	protein deacetylase activity	1.88822e-05	0.000154112	9.40804e-05	HDAC2/HDAC1/HDAC5/SIRT7	4
	GO:0030332	cyclin binding	2.16948e-05	0.000166779	0.000101813	CDK2/CDK1/XRCC6/CUL3	4
	GO:0042162	telomeric DNA binding	5.07537e-05	0.000347476	0.000212123	RPA2/RPA1/HNRNPA1/XRCC6	4
	GO:0019213	deacetylase activity	0.000101271	0.000633373	0.000386655	HDAC2/HDAC1/HDAC5/SIRT7	4
	GO:0045309	protein phosphorylated amino acid binding	0.000180982	0.00109479	0.000668337	GRB2/YWHAE/YWHAB/MAPK1	4
	GO:0036002	pre-mRNA binding	0.000410046	0.0023278	0.00142105	HNRNPU/HNRNPA1/U2AF2/EP300	4
	GO:0001098	basal transcription machinery binding	0.000681793	0.00369973	0.00225857	HNRNPU/TP53/ESR1/AR	4
	GO:0001099	basal RNA polymerase II transcription machinery binding	0.000681793	0.00369973	0.00225857	HNRNPU/TP53/ESR1/AR	4
	GO:0016811	hydrolase activity, acting on carbon-nitrogen (but not peptide) bonds, in linear amides	0.00071828	0.00382832	0.00233707	HDAC2/HDAC1/HDAC5/SIRT7	4
	GO:0003725	double-stranded RNA binding	0.000795365	0.00413366	0.00252347	HNRNPU/STAU1/HSP90AB1/CLTC	4
	GO:0043130	ubiquitin binding	0.000836019	0.0042259	0.00257978	HSPB1/IKBKG/SMAD3/MDM2	4
	GO:0008013	beta-catenin binding	0.00111127	0.00546743	0.0033377	ESR1/AR/EP300/SMAD3	4
	GO:0031491	nucleosome binding	0.00127029	0.00608751	0.00371624	HDAC2/HDAC1/EED/ACTB	4
	GO:1990782	protein tyrosine kinase binding	0.00177111	0.00778022	0.00474959	TP53/PCNA/HSP90AA1/YWHAG	4
	GO:0003727	single-stranded RNA binding	0.00191496	0.00810221	0.00494615	HNRNPU/HNRNPA1/U2AF2/TARDBP	4
	GO:0032182	ubiquitin-like protein binding	0.00198983	0.00815831	0.0049804	HSPB1/IKBKG/SMAD3/MDM2	4
	GO:0016810	hydrolase activity, acting on carbon-nitrogen (but not peptide) bonds	0.00485559	0.0175658	0.0107234	HDAC2/HDAC1/HDAC5/SIRT7	4
	GO:0140030	modification-dependent protein binding	0.00841578	0.0267709	0.0163428	SUZ12/IKBKG/VCP/IKBKE	4
	GO:0030674	protein binding, bridging	0.014765	0.0409645	0.0250076	GRB2/OBSL1/HSPA8/SRC	4
	GO:0031078	histone deacetylase activity (H3-K14 specific)	1.92117e-05	0.000154112	9.40804e-05	HDAC2/HDAC1/HDAC5	3
	GO:0032041	NAD-dependent histone deacetylase activity (H3-K14 specific)	1.92117e-05	0.000154112	9.40804e-05	HDAC2/HDAC1/HDAC5	3
	GO:0098505	G-rich strand telomeric DNA binding	1.92117e-05	0.000154112	9.40804e-05	RPA2/RPA1/HNRNPA1	3
	GO:0070411	I-SMAD binding	2.63099e-05	0.00019813	0.000120952	SMURF1/SMAD2/CTNNB1	3
	GO:0043047	single-stranded telomeric DNA binding	3.49389e-05	0.000252793	0.000154323	RPA2/RPA1/HNRNPA1	3
	GO:0098847	sequence-specific single stranded DNA binding	5.73444e-05	0.000377859	0.000230671	RPA2/RPA1/HNRNPA1	3
	GO:0070182	DNA polymerase binding	0.000149616	0.000920137	0.000561716	PCNA/HSP90AA1/HSP90AB1	3
	GO:0044183	protein binding involved in protein folding	0.000269086	0.00157607	0.000962145	HSPB1/HSPA5/HSPA8	3
	GO:0071889	14-3-3 protein binding	0.000541977	0.00303014	0.00184981	AKT1/ARRB2/YWHAQ	3
	GO:0016504	peptidase activator activity	0.00120694	0.00586002	0.00357736	APP/FN1/VCP	3
	GO:0001221	transcription cofactor binding	0.00173066	0.00769416	0.00469705	CDC5L/ESR1/RELA	3
	GO:0018024	histone-lysine N-methyltransferase activity	0.00184989	0.00803069	0.00490249	SUZ12/EED/EZH2	3
	GO:0001046	core promoter sequence-specific DNA binding	0.00197412	0.00815831	0.0049804	TP53/HDAC1/EZH2	3
	GO:0031593	polyubiquitin modification-dependent protein binding	0.00282859	0.0114698	0.00700194	IKBKG/VCP/IKBKE	3
	GO:0031492	nucleosomal DNA binding	0.00350701	0.0137669	0.00840426	HDAC2/HDAC1/ACTB	3
	GO:0042054	histone methyltransferase activity	0.00388033	0.0148758	0.00908123	SUZ12/EED/EZH2	3
	GO:0016279	protein-lysine N-methyltransferase activity	0.00448419	0.0165467	0.0101012	SUZ12/EED/EZH2	3
	GO:0016278	lysine N-methyltransferase activity	0.0046974	0.0171618	0.0104767	SUZ12/EED/EZH2	3
	GO:0004860	protein kinase inhibitor activity	0.00514197	0.0180703	0.0110314	NPM1/HSPB1/YWHAG	3
	GO:0019210	kinase inhibitor activity	0.00610507	0.0202952	0.0123896	NPM1/HSPB1/YWHAG	3
	GO:0030971	receptor tyrosine kinase binding	0.0066243	0.0216316	0.0132054	TP53/PCNA/YWHAG	3
	GO:0008276	protein methyltransferase activity	0.0124783	0.0359726	0.0219602	SUZ12/EED/EZH2	3
	GO:0003730	mRNA 3'-UTR binding	0.0140775	0.0396535	0.0242072	HNRNPU/TP53/TARDBP	3
	GO:0008170	N-methyltransferase activity	0.0162331	0.0440442	0.0268876	SUZ12/EED/EZH2	3
	GO:0005072	transforming growth factor beta receptor, cytoplasmic mediator activity	0.00132698	0.0061207	0.0037365	SMAD2/SMAD3	2
	GO:0005165	neurotrophin receptor binding	0.00132698	0.0061207	0.0037365	GRB2/NTRK1	2
	GO:0030957	Tat protein binding	0.00132698	0.0061207	0.0037365	NPM1/ACTB	2
	GO:0031386	protein tag	0.00161602	0.00727209	0.00443939	RPS27A/UBC	2
	GO:0043422	protein kinase B binding	0.00161602	0.00727209	0.00443939	TRAF6/ARRB2	2
	GO:0042975	peroxisome proliferator activated receptor binding	0.00193224	0.00810221	0.00494615	IKBKG/MDM2	2
	GO:0070410	co-SMAD binding	0.00193224	0.00810221	0.00494615	SMAD2/SMAD3	2
	GO:0032794	GTPase activating protein binding	0.00346284	0.0137397	0.00838765	AKT1/TUBB	2
	GO:0035173	histone kinase activity	0.00391044	0.0148758	0.00908123	CDK2/CDK1	2
	GO:1990381	ubiquitin-specific protease binding	0.00391044	0.0148758	0.00908123	VCP/CLTC	2
	GO:0008353	RNA polymerase II CTD heptapeptide repeat kinase activity	0.00438344	0.0163383	0.00997401	CDK1/MAPK1	2
	GO:0031435	mitogen-activated protein kinase kinase kinase binding	0.00438344	0.0163383	0.00997401	TRAF6/MAPK1	2
	GO:0008157	protein phosphatase 1 binding	0.00540445	0.0186378	0.0113778	STAU1/CDC5L	2
	GO:0042288	MHC class I protein binding	0.00540445	0.0186378	0.0113778	TUBB/VCP	2
	GO:0019789	SUMO transferase activity	0.00595189	0.0199659	0.0121886	UBE2I/MDM2	2
	GO:0017025	TBP-class protein binding	0.00652359	0.0214929	0.0131208	CAND1/ESR1	2
	GO:0001223	transcription coactivator binding	0.00711926	0.0230439	0.0140676	ESR1/RELA	2
	GO:0033612	receptor serine/threonine kinase binding	0.00838139	0.0267709	0.0163428	SRC/MDM2	2
	GO:0005112	Notch binding	0.00904732	0.0280543	0.0171263	CUL3/SNW1	2
	GO:0042974	retinoic acid receptor binding	0.00904732	0.0280543	0.0171263	FUS/SNW1	2
	GO:0051787	misfolded protein binding	0.00904732	0.0280543	0.0171263	HSPA5/HSPA8	2
	GO:0046875	ephrin receptor binding	0.00973612	0.0299386	0.0182766	GRB2/SRC	2
	GO:0043425	bHLH transcription factor binding	0.0104475	0.0313426	0.0191337	SMAD3/CREBBP	2
	GO:0004693	cyclin-dependent protein serine/threonine kinase activity	0.0111813	0.0327451	0.0199899	CDK2/CDK1	2
	GO:0035035	histone acetyltransferase binding	0.0111813	0.0327451	0.0199899	TP53/PCNA	2
	GO:0097472	cyclin-dependent protein kinase activity	0.0119371	0.0346833	0.0211731	CDK2/CDK1	2
	GO:0030291	protein serine/threonine kinase inhibitor activity	0.0135139	0.0383587	0.0234168	HSPB1/YWHAG	2
	GO:0051721	protein phosphatase 2A binding	0.0135139	0.0383587	0.0234168	TP53/AKT1	2
	GO:0008187	poly-pyrimidine tract binding	0.0143344	0.0400711	0.0244622	HNRNPU/U2AF2	2
	GO:0000979	RNA polymerase II core promoter sequence-specific DNA binding	0.0151759	0.0417904	0.0255118	HDAC1/EZH2	2
	GO:0001103	RNA polymerase II repressing transcription factor binding	0.0160382	0.0438378	0.0267617	HDAC2/HDAC1	2

## Sheet: PPI data
Alzheimer's disease-related differentially expressed genes (DEGs)		YZQX putative targets
GAS2L1		PTGS1
DTNA		PTGS2
MALAT1		NCOA2
PXDC1		NOS2
HSD17B7		HTR
NSUN6		KCNH2
AMER2		ESR1
SEMA4C		AR
COL27A1		SCN5A
ITPKB		PPARG
NUCKS1		F7
ERBB2IP		KDR
SRRM2		RXRA
MAFF		ADRB2
KLF15		ESR2
ARHGEF40		DPP4
BCL6		MAPK14
MED13L		GSK3B
SASH1		HSP90AA1
TNPO1		CDK2
MAP4K4		CHEK1
CREBBP		IGHG1
SLC35E1		CCNA2
JUND		NCOA1
IDH3G		NR3C2
NFIA		NR3C1
ANP32B		PGR
ATP5C1		PRSS1
FAM63A		PDE10A
TUBB		CALM1
ACACB		CHRM3
MKNK2		CHRM1
BBX		CHRM5
NFKBIA		HTR3A
TOB1		ADRA2C
PFKFB3		CHRM4
SNRNP48		OPRD1
CTD-3092A11.2		ADRA1B
KIAA0485		SLC6A3
LUC7L3		ADRA1D
QKI		SLC6A4
ADAM33		OPRM1
RFX4		DRD1
EZR		DRD5
TAF3		SLC6A2
DNAJC1		ADRA1A
CDK13		CHRM2
LOC101929787		GABRA1
SOX2		GRIA2
ATP8B1		AKR1B1
NOTCH2		MMP3
LPP		ACHE
NOTCH2NL		MAOB
HIPK2		RELA
MSI2		EGFR
VCAN		AKT1
PRR34-AS1		VEGFA
GLUL		CCND1
PGF		BCL2
RP11-403P17.4		BCL2L1
PRR11		FOS
KIF5B		CDKN1A
PLSCR4		EIF6
ZFP36L1		BAX
HIP1R		CASP9
ZC3H7B		PLAU
ANKRD36		MMP2
RP11-194N12.2		MMP9
KMT2E		MAPK1
ATP5B		IL10RB
LIFR		EGF
PSMB3		RB1
RAB11FIP3		TNFSF15
PCYOX1L		JUN
ME3		IL6
RPS16P5		AHSA1
LOC202181		CASP3
PTMA		TP63
LRP4		ELK1
RAD51C		NFKBIA
PALLD		POR
MT1M		ODC1
MNT		CASP8
ZBED6		TOP1
AFF1		RAF1
RAP1GDS1		SOD1
IQCA1		PRKCA
NME1		MMP1
CASP6		HIF1A
CCDC152		STAT1
ID4		RUNX1T1
UBXN2A		CDK1
ITGB5		HSPA5
COPG2IT1		ERBB2
NLN		ACACA
TP53INP1		HMOX1
MEGF10		CYP3A4
GFAP		CYP1A2
RBM25		CAV1
EMC4		MYC
CMBL		F3
NDUFA7		GJA1
ANKDD1A		CYP1A1
DDIT4		ICAM1
NACC2		IL1B
PMP2		CCL2
AP3M2		SELE
MXI1		VCAM1
SYMPK		PTGER3
LOC100272216		IL8RA
HIF3A		PRKCB
CALM1		BIRC5
ESF1		DUOX2
PSMB7		NOS3
TGFBR3		HSPB1
ZNF423		SULT1E1
STK35		MGAM
TUBB4B		IL2
ANXA6		NR1I2
ATP6V1G2		CYP1B1
PTPN3		CCNB1
C9orf64		PLAT
PCDHGA4		THBD
PALD1		SERPINE1
MYO10		COL1A1
MLLT11		IFNGR1
ZNF721		ALOX5
TJAP1		IL1A
ZNF160		MPO
ZNRF3		TOP2A
DDX59		NCF1
CEBPB		ABCG2
ITPRIPL2		HAS2
FBXW12		GSTP1
TUBB3		NFE2L2
SLC35B1		NQO1
HDAC7		PARP1
FAT1		AHR
TJP1		PSMD3
SLC25A4		SLC2A4
MT2A		COL3A1
SKI		CXCL11
SAMD4A		CXCL2
PDCD6		DCAF5
ADCYAP1		NR1I3
TBL1X		CHEK2
UCHL1		INSRR
CSRNP1		CLDN4
TNS1		PPARA
RELL1		PPARD
COL5A3		HSF1
AGAP4		CRP
PSD2		CXCL10
NEK7		CHUK
YAP1		SPP1
SOX9		RUNX2
GLS2		RASSF1
CSPG5		E2F1
GRAMD1C		E2F2
ATP1A2		ACPP
BAG3		CTSD
CDK2AP1		IGFBP3
EMX2OS		IGF2
INA		CD40LG
ACOT7		IRF1
SEMA3F		ERBB3
PHF6		PON1
FAM107B		DIO1
ZNF415		PCOLCE
SLC12A7		NPEPPS
DBT		HK2
ANKRD13D		RASA1
PARD3		GSTM1
KCNJ10		GSTM2
KCNE4		ADH1C
MAPKBP1		ADRA2A
FBXL17		LTA4H
SST		MAOA
SCARNA17		CTRB1
GLIS3		ADRB1
POU3F3		CHRNA2
CXCR4		MAP2
MGC12488		IKBKB
ASAH2B		MAPK8
SLC5A3		PPP3CA
PLOD2		AKR1C3
ZCCHC24		SLPI
CD200		RXRG
RASEF		CASP1
LOC100289333		ADCYAP1
TNFRSF10B		PSMG1
CEBPD		MAP2K4
LDLRAP1		CACNA1S
ATP6V1H
GRAMD3
JPX
SLC22A3
ATP6V1B2
BMPR1B
MT1G
SCN2B
PTPRZ1
SEPP1
GPI
NUMBL
TUSC3
FAR2
METTL7A
KAT2B
LOC101060510
SF3B5
TFEB
SCRIB
MZT2B
ANLN
EIF2B3
AQP4
PTN
RTN3
PSAT1
RP11-73M18.8
LOC286437
SLC7A2
CLDN15
ELAVL3
SLC1A6
RHOBTB3
MT1F
SLIRP
LOC100130987
GOT1
FGF12
SLC39A12
CDC37
CRYM
SLC38A2
CTB-12A17.3
RHPN2
SERPINE2
ARHGEF26
JAZF1
PSMA5
ZIC1
ZBTB20
DYNC1I1
HVCN1
SDR16C5
MSX1
CALY
GRIN1
TBC1D7
MAP2K4
DHCR24
SULT4A1
HSPA2
RIN2
GPRC5B
XAF1
GJA1
CHRM1
ZFP36L2
ZNF204P
LOC101927166
RAB13
XRCC2
WWTR1
EMX2
SLC1A3
NUDT2
UQCRFS1
RTN4IP1
DHRS7B
GOLIM4
LOC286367
AMOTL2
ATRNL1
ATP6V1E1
MDH1
EFHD1
GPER1
SDC4
MT1E
TMEM123
NFIC
GABRG2
EEF1A2
FGFR3
FHL2
CNOT10
GPAM
COPS3
ZIC2
SV2B
SDHB
ELTD1
SLC26A6
PECAM1
HSP90B1
CHGB
NRXN3
MEG3
TBC1D9
TNS3
RWDD2B
SRGN
PON2
IL17RB
SPP1
IRF2BPL
ND6
AGAP9
NOMO3
RP11-416I2.1
PCSK5
NRN1
RHOU
CA10
JAZF1-AS1
SSBP3-AS1
RAB3C
FIBP
RP11-373D23.2
FYCO1
RP11-334C17.5
STAT4
NIT2
SUSD4
MT1H
AK090844
LOC100131541
NXN
NECAP1
GABRA4
C1QTNF4
OSMR
LOC728061
LOC100130429
MT1X
RAB31
CAMK1G
RP11-395B7.7
PIDD1
CDK7
GABRG1
LOC439911
ACKR3
BC022892
LOC100134445
LARGE
LOC646014
FAM198B
CHCHD6
BCAS1
KLF2
C11orf73
CRMP1
PCAT19
SLAIN1
VASN
CUL1
MPV17
KIF1C
SYN2
RRAGB
MIR7-3HG
COPS5
GABRA1
BC045805
ID2
NKX2-2
CARTPT
NVL
LOC100289019
MAML2
SERTM1
SLC25A18
TM7SF2
DYRK4
DTX3L
MAL2
SURF2
LOC100289283
KIFAP3
C21orf91
FOXC1
RP11-157P1.4
LOC100129447
VASP
MTX2
OLIG1
RP11-1114A5.4
STMN2
HPRT1
ZNF566
WDR70
IMPDH2
ID3
ARPC1A
RP11-389C8.2
C11orf96
APOO
FAM71E1
CLPP
LDHA
RP11-357G3.2
ITGA6
PPIH
KLF4
AMPH
BEX4
SMYD3
TFAP2C
AHNAK
CARD6
PPEF1
PRO2852
DNTTIP1
EPS8
ARHGEF1
PTPRO
PLP1
CAPNS1
KDM1A
GAREML
LOC102724356
BLVRB
BEX5
CCK
AX747507
NUDT18
MYBPC1
CLEC2L
TUBA4A
F3
MRVI1
APOLD1
PAXIP1OS
HSP90AB1
TNFRSF1A
RGS7
C19orf18
ITGAV
LAMB2
WDR7
MIR302B
STAR
PSMG1
ROMO1
CUX1
HMP19
AEBP1
PRMT7
CECR6
RNF181
PAIP2B
ZWINT
LAMP5
PBXIP1
MROH6
CALB1
C14orf37
MECR
RP11-690I21.2
CRB2
NCALD
LPAR1
ZBBX
IGFBP7
PPM1E
ACTL6B
EMC9
SLC18B1
USP39
FAM107A
ANKRD36B
AIF1L
EPAS1
RP11-295G20.2
AF289551
HSPB3
RUVBL1
TBC1D19
UQCRC1
LOC101930415
RP11-69I8.2
LOC100507557
PDK4
TARBP1
C14orf119
SERPINF1
LOC102724870
LOC100133089
ABT1
GLRX
LINC00889
LRRC32
SLC27A4
ATOX1
RP11-589P10.5
TMEM191A
ST6GALNAC5
SNX31
GNG3
SNX10
IFITM1
LSM7
HACL1
LOC283484
RPA3
SEPSECS-AS1
YBX3
MIF
ERICH3
SMYD5
MRPL37
PRO1804
IGFBPL1
ZNF57
BC041025
CSPG4
PRR3
FGR
LOC100134822
UBE2T
SSSCA1
ATOH7
DDIT4L
KCNJ16
RP11-271C24.3
SOX2-OT
SGIP1
MRPS28
HEPH
LEAP2
CXCL1
RPH3A
GABRD
SLCO4A1
MAEL
ATP6AP1
CCNA1
C11orf97
LATS2
PHYHD1
PSMC4
ENC1
CHST6
RP11-38P22.2
LOC100506563
COL1A2
C15orf52
LRMP
PPP1R14C
FOXD1
PET112
SOSTDC1
MSH2
ASAP1-IT2
PCSK1
FHOD3
UBL7
CASP7
ELMO1
AY940074
PAQR6
PSMD8
CDK5
AQP11
ERC2-IT1
EIF3C
LAMTOR2
VAC14-AS1
AP000347.2
DMAP1
C14orf79
LOC285696
ACTRT3
EXOSC5
CCT7
ZNF488
NAT6
THEM6
ESAM
LOC729870
EPDR1
SMIM10
SCO1
MIR34A
SPHKAP
YJEFN3
ANKRD34C
PNMAL2
LENG8
TCIRG1
RBP4
TCAP
NPTX2
NME7
CHAF1B
MRGPRF
GJA4
PODXL2
PKD1P1
RP4-758J24.5
NLRC5
AK021977
FAM65C
LRRC4
SYAP1
ZNF217
NEUROD6
ACSF2
RP3-327A19.5
SLC39A10
TTLL1
SLC14A1
EIF3G
UHRF1
NDRG2
NECAB1
WDR46
GIMAP7
TDRD10
CHI3L1
ANKRD39
NELL2
PEAR1
RP11-65J3.14
SLC6A12
BC045789
PCDHAC2
PLK2
LRRC75A
UBE2S
OR7E47P
KDELC2
NELL1
P2RY14
COG7
ZNF222
CORO1A
PRKAG1
STAG3L3
LOC100129973
GOLT1A
MTFR1L
CLTC-IT1
APLNR
FCRLB
SLC16A9
TMEM59L
LOC100288310
AP000265.1
OCA2
AOC3
RARRES2
FLJ37786
PP12719
AP000253.1
SERPINI1
NEU1
LSR
SYT1
RDH5
LOC102724611
PDE6H
SCN3B
ZNF713
DUSP4
OSTF1
KRTAP10-11
AMZ2P1
PSMC3
RFWD3
LYPD6B
IL13RA2
LOC158434
TMEM200A
NWD2
ZMAT4
HIGD1B
VSIG10L
RP11-421E14.2
SUSD1
PYCRL
PLA2G4A
TGFB1I1
SERPINA3
POR
PPARG
LRRC69
RTBDN
LOC101929143
TYRP1
TMEM151A
RP11-305O6.3
ZNF165
DYDC2
HLA-DRB4
SLC30A3
SNCB
LOC100132891
TAC1
UBE2M
RGS1
PVALB
RSPO2
RPS4Y1
FREM3
XIST
